# Supplementary material for: Guaiane sesquiterpenes from the gorgonian Echinogorgia flora collected in the South China Sea
Source: Royal Society of Chemistry journal article supplement (doi:10.1039/d1ra08631f), 2022-01-01
Supplement: d1ra08631f1.pdf [file d1ra08631f1.pdf]

## Supporting Information

### **Guaiane Sesquiterpenes from the Gorgonian *Echinogorgia flora* Collected in the South China Sea**

Xiangchao Luo,<sup>‡ab</sup> Rongcui Wu,<sup>‡ab</sup> Xiao Han,<sup>‡ab</sup> Xuli Tang,<sup>c</sup> Qi Wang,<sup>abd</sup> Pinglin Li,<sup>\*ab</sup> and Guoqiang Li<sup>\*ab</sup>

<sup>a</sup> Key Laboratory of Marine Drugs, Chinese Ministry of Education, School of Medicine and Pharmacy, Ocean University of China, Qingdao 266003, People's Republic of China

<sup>b</sup> Laboratory of Marine Drugs and Biological Products, Pilot National Laboratory for Marine Science and Technology, Qingdao 266235, People's Republic of China

<sup>c</sup> College of Chemistry and Chemical Engineering, Ocean University of China, Qingdao 266100, People's Republic of China

<sup>d</sup> Department of Natural Medicinal Chemistry and Pharmacognosy, School of Pharmacy, Qingdao University, Qingdao 266021, People's Republic of China

## Contents

|                                                                                                                                                                                                                                                                                                                                                                                                                                                                                                                          |    |
|--------------------------------------------------------------------------------------------------------------------------------------------------------------------------------------------------------------------------------------------------------------------------------------------------------------------------------------------------------------------------------------------------------------------------------------------------------------------------------------------------------------------------|----|
| <b>Fig. S1.</b> The target structures of compound <b>1</b> for calculation.....                                                                                                                                                                                                                                                                                                                                                                                                                                          | 4  |
| <b>Table S1.</b> Stable conformers of compound <b>1</b> with (4 <i>R</i> , 6 <i>R</i> , 8 <i>R</i> )- <b>1a</b> , (4 <i>R</i> , 6 <i>R</i> , 8 <i>S</i> )- <b>1b</b> , (4 <i>R</i> , 6 <i>S</i> , 8 <i>R</i> )- <b>1c</b> and (4 <i>R</i> , 6 <i>S</i> , 8 <i>S</i> )- <b>1d</b> configurations, respectively.....                                                                                                                                                                                                       | 4  |
| <b>Table S2.</b> Important thermodynamic parameters (a.u.) of the optimized compound <b>1</b> with simplified structures at B3LYP/6-31+G(d,p) level in the gas phase.....                                                                                                                                                                                                                                                                                                                                                | 4  |
| <b>Table S3.</b> Optimized Z-Matrixes of compound <b>1</b> with simplified structures in the Gas Phase (Å) at B3LYP/6-31+G(d,p) level.....                                                                                                                                                                                                                                                                                                                                                                               | 5  |
| <b>Fig. S2</b> The fitting lines of experimental and calculated NMR data of <b>1</b> .....                                                                                                                                                                                                                                                                                                                                                                                                                               | 7  |
| <b>Table S4</b> Chemical shifts of experimental and calculated NMR and spatial distance between H-4 and N-1' .....                                                                                                                                                                                                                                                                                                                                                                                                       | 8  |
| <b>Fig. S3</b> Detailed DP4+ probability (calculated at PCM/b3lyp/6-311+G(d,p) level) for compound <b>1</b> . Isomer 1 is (4 <i>R</i> , 6 <i>R</i> , 8 <i>R</i> )- <b>1a</b> , isomer 2 is (4 <i>R</i> , 6 <i>R</i> , 8 <i>S</i> )- <b>1b</b> , isomer 3 is (4 <i>R</i> , 6 <i>S</i> , 8 <i>R</i> )- <b>1c</b> , and isomer 4 is (4 <i>R</i> , 6 <i>S</i> , 8 <i>S</i> )- <b>1d</b> .....                                                                                                                                | 8  |
| <b>Fig. S4.</b> The target structures of compound <b>2</b> for calculation.....                                                                                                                                                                                                                                                                                                                                                                                                                                          | 9  |
| <b>Table S5.</b> Stable conformers of compound <b>2</b> with (1 <i>R</i> , 5 <i>S</i> , 8 <i>S</i> )- <b>2a</b> and (1 <i>R</i> , 5 <i>R</i> , 8 <i>S</i> )- <b>2b</b> configurations, respectively.....                                                                                                                                                                                                                                                                                                                 | 9  |
| <b>Table S6.</b> Important thermodynamic parameters (a.u.) of the optimized compound <b>2</b> with simplified structures at B3LYP/6-31+G(d,p) level in the gas phase.....                                                                                                                                                                                                                                                                                                                                                | 9  |
| <b>Table S7.</b> Optimized Z-Matrixes of compound <b>2</b> with simplified structures in the Gas Phase (Å) at B3LYP/6-31+G(d,p) level.....                                                                                                                                                                                                                                                                                                                                                                               | 9  |
| <b>Fig. S5.</b> Detailed DP4+ probability (calculated at PCM/b3lyp/6-311+G(d,p) level) for compound <b>2</b> . Isomer 1 is (1 <i>R</i> , 5 <i>S</i> , 8 <i>S</i> )- <b>2a</b> , isomer 2 is (1 <i>R</i> , 5 <i>R</i> , 8 <i>S</i> )- <b>2b</b> , isomer 3 is (1 <i>R</i> , 5 <i>R</i> , 8 <i>R</i> )- <b>2c</b> , isomer 4 is (1 <i>R</i> , 5 <i>R</i> , 8 <i>S</i> )- <b>2d</b> , isomer 5 is (1 <i>R</i> , 5 <i>S</i> , 8 <i>R</i> )- <b>2e</b> , isomer 6 is (1 <i>R</i> , 5 <i>S</i> , 8 <i>S</i> )- <b>2f</b> ..... | 11 |
| <b>Table S8.</b> Stable conformers of compound <b>3</b> with (1 <i>S</i> , 4 <i>R</i> , 8 <i>R</i> , 10 <i>R</i> )- <b>3a</b> and(1 <i>R</i> , 4 <i>S</i> , 8 <i>S</i> , 10 <i>S</i> )- <b>3b</b> configurations, respectively.....                                                                                                                                                                                                                                                                                      | 12 |
| <b>Table S9.</b> Important thermodynamic parameters (a.u.) of the optimized compound <b>3</b> with simplified structures at B3LYP/6-31+G(d,p) level in the gas phase.....                                                                                                                                                                                                                                                                                                                                                | 12 |
| <b>Table S10.</b> Optimized Z-Matrixes of compound <b>3</b> with simplified structures in the Gas Phase (Å) at B3LYP/6-31+G(d,p) level.....                                                                                                                                                                                                                                                                                                                                                                              | 12 |
| <b>Table S11.</b> Stable conformers of compound <b>4</b> with (1 <i>R</i> , 5 <i>S</i> , 8 <i>S</i> , 10 <i>R</i> )- <b>4a</b> and (1 <i>S</i> , 5 <i>R</i> , 8 <i>R</i> , 10 <i>S</i> )- <b>4b</b> configurations, respectively.....                                                                                                                                                                                                                                                                                    | 13 |
| <b>Table S12.</b> Important thermodynamic parameters (a.u.) of the optimized compound <b>4</b> at B3LYP/6-31+G(d,p) level in the gas phase.....                                                                                                                                                                                                                                                                                                                                                                          | 13 |
| <b>Table S13.</b> Optimized Z-Matrixes of compound <b>4</b> with simplified structures in the Gas Phase (Å) at B3LYP/6-31+G(d,p) level.....                                                                                                                                                                                                                                                                                                                                                                              | 14 |
| <b>Fig. S6 (A)</b> Experimental ECD spectra of <b>3-4</b> ; <b>(B)</b> optimal conformations and MOs of <b>3</b> and <b>4e</b> (the enantiomer of <b>4</b> ).....                                                                                                                                                                                                                                                                                                                                                        | 15 |
| <b>Fig. S7.</b> HRESIMS spectrum of compound <b>1</b> .....                                                                                                                                                                                                                                                                                                                                                                                                                                                              | 16 |
| <b>Fig. S8.</b> <sup>1</sup> H NMR spectrum of compound <b>1</b> in CDCl <sub>3</sub> .....                                                                                                                                                                                                                                                                                                                                                                                                                              | 16 |
| <b>Fig. S9.</b> <sup>13</sup> C NMR spectrum of compound <b>1</b> in CDCl <sub>3</sub> .....                                                                                                                                                                                                                                                                                                                                                                                                                             | 17 |
| <b>Fig. S10.</b> <sup>13</sup> C and DEPT spectrum of compound <b>1</b> in CDCl <sub>3</sub> .....                                                                                                                                                                                                                                                                                                                                                                                                                       | 17 |

|                                                                                                               |    |
|---------------------------------------------------------------------------------------------------------------|----|
| <b>Fig. S11.</b> HSQC spectrum of compound <b>1</b> in CDCl <sub>3</sub> .....                                | 18 |
| <b>Fig. S12.</b> <sup>1</sup> H- <sup>1</sup> H-COSY spectrum of compound <b>1</b> in CDCl <sub>3</sub> ..... | 18 |
| <b>Fig. S13.</b> HMBC spectrum of compound <b>1</b> in CDCl <sub>3</sub> .....                                | 19 |
| <b>Fig. S14.</b> NOESY spectrum of compound <b>1</b> in CDCl <sub>3</sub> .....                               | 19 |
| <b>Fig. S15.</b> IR spectrum of compound <b>1</b> .....                                                       | 20 |
| <b>Fig. S16.</b> UV spectrum of compound <b>1</b> .....                                                       | 20 |
| <b>Fig. S17.</b> HRESIMS spectrum of compound <b>2</b> .....                                                  | 21 |
| <b>Fig. S18.</b> <sup>1</sup> H NMR spectrum of compound <b>2</b> in CDCl <sub>3</sub> .....                  | 21 |
| <b>Fig. S19.</b> <sup>13</sup> C NMR spectrum of compound <b>2</b> in CDCl <sub>3</sub> .....                 | 22 |
| <b>Fig. S20.</b> <sup>13</sup> C and DEPT spectrum of compound <b>2</b> in CDCl <sub>3</sub> .....            | 22 |
| <b>Fig. S21.</b> HSQC spectrum of compound <b>2</b> in CDCl <sub>3</sub> .....                                | 23 |
| <b>Fig. S22.</b> <sup>1</sup> H- <sup>1</sup> H-COSY spectrum of compound <b>2</b> in CDCl <sub>3</sub> ..... | 23 |
| <b>Fig. S23.</b> NOESY spectrum of compound <b>2</b> in CDCl <sub>3</sub> .....                               | 24 |
| <b>Fig. S24.</b> HMBC spectrum of compound <b>2</b> in CDCl <sub>3</sub> .....                                | 24 |
| <b>Fig. S25.</b> IR spectrum of compound <b>2</b> .....                                                       | 25 |
| <b>Fig. S26.</b> UV spectrum of compound <b>2</b> .....                                                       | 25 |
| <b>Fig. S27.</b> HRESIMS spectrum of compound <b>3</b> .....                                                  | 26 |
| <b>Fig. S28.</b> <sup>1</sup> H NMR spectrum of compound <b>3</b> in DMSO.....                                | 26 |
| <b>Fig. S29.</b> <sup>13</sup> C NMR spectrum of compound <b>3</b> in DMSO.....                               | 27 |
| <b>Fig. S30.</b> <sup>13</sup> C and DEPT spectrum of compound <b>3</b> in DMSO.....                          | 27 |
| <b>Fig. S31.</b> HSQC spectrum of compound <b>3</b> in DMSO.....                                              | 28 |
| <b>Fig. S32.</b> <sup>1</sup> H- <sup>1</sup> H-COSY spectrum of compound <b>3</b> in DMSO.....               | 28 |
| <b>Fig. S33.</b> HMBC spectrum of compound <b>3</b> in DMSO.....                                              | 29 |
| <b>Fig. S34.</b> NOESY spectrum of compound <b>3</b> in DMSO.....                                             | 29 |
| <b>Fig. S35.</b> IR spectrum of compound <b>3</b> .....                                                       | 30 |
| <b>Fig. S36.</b> UV spectrum of compound <b>3</b> .....                                                       | 30 |
| <b>Fig. S37.</b> HRESIMS spectrum of compound <b>4</b> .....                                                  | 31 |
| <b>Fig. S38.</b> <sup>1</sup> H NMR spectrum of compound <b>4</b> in DMSO.....                                | 31 |
| <b>Fig. S39.</b> <sup>13</sup> C NMR spectrum of compound <b>4</b> in DMSO.....                               | 32 |
| <b>Fig. S40.</b> HSQC spectrum of compound <b>4</b> in DMSO.....                                              | 32 |
| <b>Fig. S41.</b> <sup>1</sup> H- <sup>1</sup> H-COSY NMR spectrum of compound <b>4</b> in DMSO.....           | 33 |
| <b>Fig. S42.</b> HMBC NMR spectrum of compound <b>4</b> in DMSO.....                                          | 33 |
| <b>Fig. S43.</b> NOESY spectrum of compound <b>4</b> in CDCl <sub>3</sub> .....                               | 34 |
| <b>Fig. S44.</b> IR spectrum of compound <b>4</b> .....                                                       | 34 |
| <b>Fig. S45.</b> UV spectrum of compound <b>4</b> .....                                                       | 35 |

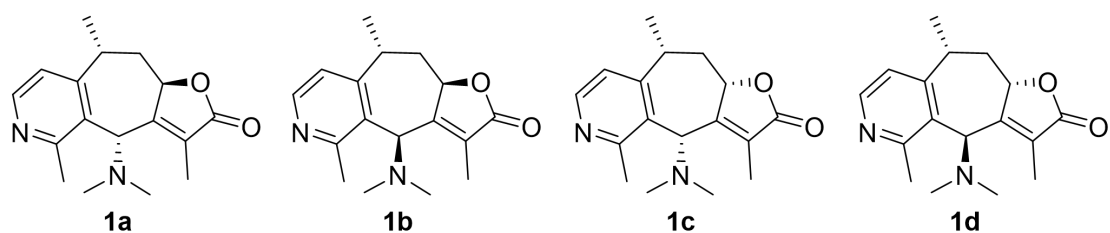

**Fig. S1.** The target structures of compound **1** for calculation.

**Table S1.** Stable conformers of compound **1** with (4*R*, 6*R*, 8*R*)-**1a**, (4*R*, 6*R*, 8*S*)-**1b**, (4*R*, 6*S*, 8*R*)-**1c** and (4*R*, 6*S*, 8*S*)-**1d** configurations, respectively.

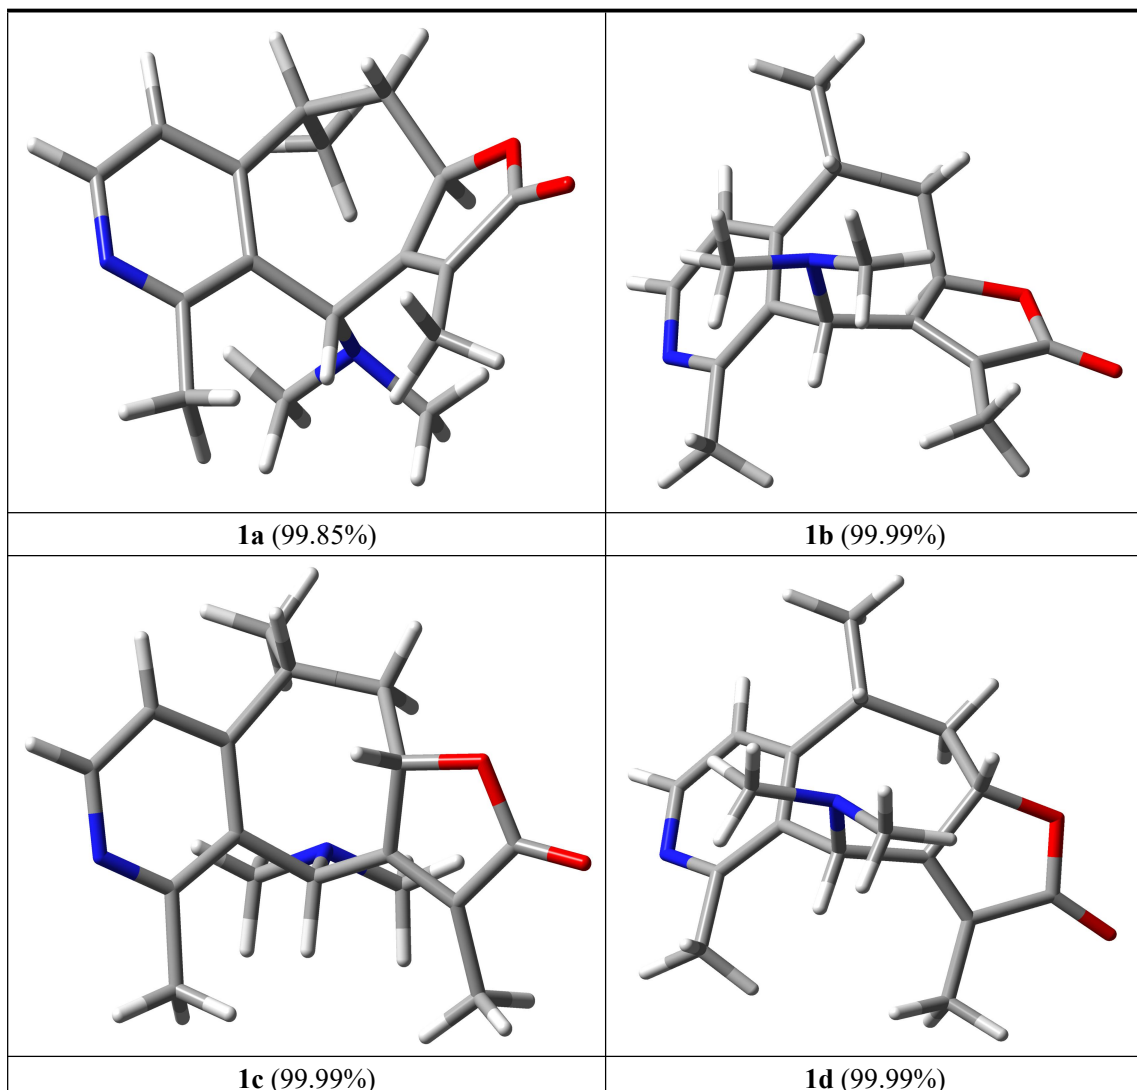

**Table S2.** Important thermodynamic parameters (a.u.) of the optimized compound **1** with simplified structures at B3LYP/6-31+G(d,p) level in the gas phase.

| NO.       | E+ZPE       | G           | NO.       | E+ZPE       | G           |
|-----------|-------------|-------------|-----------|-------------|-------------|
| <b>1a</b> | -920.670050 | -920.717362 | <b>1b</b> | -920.666615 | -920.713374 |
| <b>1c</b> | -920.663978 | -920.710861 | <b>1d</b> | -920.673352 | -920.720436 |

**Table S3.** Optimized Z-Matrixes of compound **1** with simplified structures in the Gas Phase (Å) at B3LYP/6-31+G(d,p) level.

| <b>1a</b> |           |           |           | <b>1b</b> |           |           |           |
|-----------|-----------|-----------|-----------|-----------|-----------|-----------|-----------|
| C         | 1.558967  | 1.069277  | -0.539885 | C         | 1.734230  | 0.816509  | -0.080712 |
| C         | 1.291596  | -0.285838 | -0.227453 | C         | 1.258819  | -0.470487 | 0.276978  |
| C         | 0.095753  | -0.746867 | 0.619686  | C         | -0.059257 | -1.008665 | -0.298187 |
| C         | -1.213518 | -0.237927 | 0.066669  | C         | -1.206871 | -0.129465 | 0.173454  |
| C         | -1.636128 | 1.203066  | 0.197717  | C         | -0.995244 | 1.310456  | 0.590210  |
| C         | -0.762007 | 2.193546  | -0.574534 | C         | -0.361376 | 2.244984  | -0.439670 |
| C         | 0.717542  | 2.288002  | -0.150892 | C         | 0.957137  | 1.698555  | -1.058513 |
| C         | -2.177962 | -0.921851 | -0.573492 | C         | -2.485413 | -0.461814 | 0.428367  |
| C         | -3.297624 | 0.015952  | -0.855935 | C         | -3.194504 | 0.754225  | 0.914237  |
| O         | -2.963073 | 1.251213  | -0.361910 | O         | -2.297262 | 1.788914  | 0.965692  |
| O         | -4.353345 | -0.210260 | -1.396326 | O         | -4.353940 | 0.872703  | 1.228613  |
| N         | 0.217706  | -0.369104 | 2.053769  | N         | 0.025087  | -1.126586 | -1.782082 |
| C         | -2.286282 | -2.354045 | -0.986692 | C         | -3.231273 | -1.751441 | 0.313272  |
| C         | -0.853599 | -0.967455 | 2.850933  | C         | 1.091754  | -2.044894 | -2.178513 |
| C         | 1.513783  | -0.718375 | 2.635359  | C         | -1.226303 | -1.517914 | -2.424062 |
| C         | 2.705515  | 1.336426  | -1.300553 | C         | 2.931104  | 1.242622  | 0.499867  |
| C         | 3.519812  | 0.299778  | -1.730327 | C         | 3.595168  | 0.408747  | 1.394482  |
| N         | 3.262979  | -0.982405 | -1.467445 | N         | 3.150981  | -0.797610 | 1.747733  |
| C         | 2.176016  | -1.273691 | -0.735716 | C         | 2.000603  | -1.233400 | 1.202910  |
| C         | 1.983408  | -2.760985 | -0.511161 | C         | 1.570242  | -2.608197 | 1.670669  |
| C         | 0.910771  | 2.731266  | 1.313957  | C         | 1.767347  | 2.853461  | -1.659188 |
| H         | 0.055590  | -1.842388 | 0.545018  | H         | -0.243513 | -2.010059 | 0.122842  |
| H         | -1.709493 | 1.499176  | 1.250016  | H         | -0.379903 | 1.323457  | 1.499641  |
| H         | -1.217772 | 3.184668  | -0.468742 | H         | -0.177085 | 3.206012  | 0.054615  |
| H         | -0.820498 | 1.928659  | -1.636462 | H         | -1.085274 | 2.430310  | -1.240454 |
| H         | 1.117354  | 3.103092  | -0.765736 | H         | 0.663951  | 1.031123  | -1.873472 |
| H         | -1.557074 | -2.989920 | -0.478921 | H         | -3.900133 | -1.865077 | 1.171264  |
| H         | -3.292892 | -2.727025 | -0.776319 | H         | -2.561627 | -2.613068 | 0.261823  |
| H         | -2.133730 | -2.457380 | -2.067333 | H         | -3.865107 | -1.761543 | -0.580995 |
| H         | -0.765026 | -0.624342 | 3.885594  | H         | 0.904652  | -3.086148 | -1.853243 |
| H         | -1.833818 | -0.664946 | 2.476539  | H         | 2.049536  | -1.723376 | -1.766085 |
| H         | -0.818559 | -2.073266 | 2.854028  | H         | 1.175224  | -2.045504 | -3.269163 |
| H         | 2.324676  | -0.238947 | 2.085619  | H         | -1.576047 | -2.523554 | -2.124828 |
| H         | 1.701615  | -1.807451 | 2.655635  | H         | -2.014681 | -0.797735 | -2.203326 |
| H         | 1.543630  | -0.357432 | 3.667747  | H         | -1.073850 | -1.528629 | -3.507360 |
| H         | 2.953031  | 2.360723  | -1.563711 | H         | 3.350441  | 2.212950  | 0.261537  |
| H         | 4.411646  | 0.502869  | -2.320833 | H         | 4.530232  | 0.728449  | 1.851862  |
| H         | 1.986759  | -3.030226 | 0.549992  | H         | 0.595297  | -2.587781 | 2.170452  |
| H         | 1.043513  | -3.127128 | -0.939085 | H         | 2.312992  | -2.974209 | 2.380170  |

|           |           |           |           |           |           |           |           |
|-----------|-----------|-----------|-----------|-----------|-----------|-----------|-----------|
| H         | 2.806874  | -3.281274 | -1.000956 | H         | 1.498128  | -3.323293 | 0.843786  |
| H         | 0.560325  | 1.968955  | 2.011709  | H         | 2.677953  | 2.495417  | -2.149337 |
| H         | 1.969741  | 2.921142  | 1.516133  | H         | 2.053262  | 3.595716  | -0.905812 |
| H         | 0.364402  | 3.663692  | 1.495606  | H         | 1.165717  | 3.373264  | -2.411520 |
| <b>1c</b> |           |           |           | <b>1d</b> |           |           |           |
| C         | 1.705674  | 0.925086  | -0.336344 | C         | -1.623765 | 0.888487  | -0.277636 |
| C         | 1.285377  | -0.423595 | -0.266856 | C         | -1.212583 | -0.459357 | -0.150349 |
| C         | -0.003620 | -0.837779 | 0.446452  | C         | 0.001709  | -0.860448 | 0.698727  |
| C         | -1.202378 | -0.214918 | -0.233033 | C         | 1.246092  | -0.206592 | 0.140695  |
| C         | -1.150360 | 1.194469  | -0.765524 | C         | 1.554562  | 1.255978  | 0.357410  |
| C         | -0.558189 | 2.183544  | 0.232967  | C         | 0.514699  | 2.240678  | -0.182350 |
| C         | 0.994853  | 2.172596  | 0.215941  | C         | -0.894868 | 2.032052  | 0.429287  |
| C         | -2.436080 | -0.709975 | -0.429323 | C         | 2.223032  | -0.753320 | -0.603792 |
| C         | -3.279070 | 0.378050  | -0.999274 | C         | 3.221608  | 0.306812  | -0.905053 |
| O         | -2.507986 | 1.507161  | -1.120575 | O         | 2.807835  | 1.473842  | -0.313088 |
| O         | -4.447511 | 0.345533  | -1.299985 | O         | 4.248176  | 0.220031  | -1.534428 |
| N         | 0.064666  | -0.470473 | 1.891752  | N         | -0.162051 | -0.533933 | 2.137303  |
| C         | -3.042773 | -2.041398 | -0.127097 | C         | 2.432442  | -2.139829 | -1.121397 |
| C         | 1.198915  | -1.128540 | 2.543905  | C         | -1.414848 | -1.047156 | 2.690913  |
| C         | -1.160497 | -0.785685 | 2.625604  | C         | 0.964376  | -1.037841 | 2.922975  |
| C         | 2.919859  | 1.175962  | -0.992497 | C         | -2.722371 | 1.148417  | -1.103030 |
| C         | 3.649170  | 0.132926  | -1.542368 | C         | -3.354801 | 0.099812  | -1.760265 |
| N         | 3.242986  | -1.138638 | -1.510159 | N         | -2.979244 | -1.174029 | -1.645022 |
| C         | 2.084556  | -1.413262 | -0.891721 | C         | -1.929390 | -1.454942 | -0.854532 |
| C         | 1.701052  | -2.878872 | -0.924529 | C         | -1.592260 | -2.930794 | -0.785619 |
| C         | 1.552079  | 2.579749  | 1.594290  | C         | -1.667680 | 3.359167  | 0.432322  |
| H         | -0.115702 | -1.929474 | 0.364915  | H         | 0.136096  | -1.946711 | 0.589702  |
| H         | -0.569692 | 1.230067  | -1.698178 | H         | 1.711346  | 1.458633  | 1.424685  |
| H         | -0.902555 | 3.190118  | -0.024804 | H         | 0.869753  | 3.250721  | 0.049105  |
| H         | -0.934173 | 1.957079  | 1.233920  | H         | 0.475315  | 2.156856  | -1.274218 |
| H         | 1.288472  | 2.962711  | -0.486625 | H         | -0.757326 | 1.724026  | 1.471997  |
| H         | -2.287832 | -2.799364 | 0.093821  | H         | 3.495481  | -2.393298 | -1.079995 |
| H         | -3.722846 | -1.975295 | 0.729966  | H         | 1.865913  | -2.883727 | -0.555885 |
| H         | -3.645508 | -2.375143 | -0.977235 | H         | 2.132535  | -2.212093 | -2.173542 |
| H         | 1.253202  | -0.796616 | 3.584759  | H         | -1.490748 | -0.739769 | 3.738049  |
| H         | 1.111301  | -2.231503 | 2.544944  | H         | -2.270626 | -0.636231 | 2.153200  |
| H         | 2.135450  | -0.859109 | 2.053336  | H         | -1.481930 | -2.150752 | 2.658340  |
| H         | -1.406565 | -1.864007 | 2.616479  | H         | 0.843815  | -0.728942 | 3.965240  |
| H         | -2.010613 | -0.236310 | 2.219394  | H         | 1.908822  | -0.630026 | 2.555879  |
| H         | -1.031323 | -0.482273 | 3.668473  | H         | 1.041779  | -2.141182 | 2.900292  |
| H         | 3.287432  | 2.194774  | -1.079110 | H         | -3.089631 | 2.157936  | -1.240425 |
| H         | 4.595003  | 0.324446  | -2.046285 | H         | -4.207719 | 0.292716  | -2.409053 |
| H         | 1.644915  | -3.316266 | 0.078472  | H         | -2.324994 | -3.471112 | -1.385684 |

|   |          |           |           |   |           |           |           |
|---|----------|-----------|-----------|---|-----------|-----------|-----------|
| H | 0.731856 | -3.042774 | -1.408176 | H | -0.595449 | -3.148842 | -1.184336 |
| H | 2.463934 | -3.414417 | -1.490310 | H | -1.627515 | -3.319223 | 0.237829  |
| H | 2.641619 | 2.678047  | 1.570484  | H | -1.739575 | 3.797665  | -0.568947 |
| H | 1.280562 | 1.832647  | 2.343011  | H | -2.681772 | 3.238175  | 0.825060  |
| H | 1.132070 | 3.544733  | 1.898511  | H | -1.148322 | 4.083188  | 1.067029  |

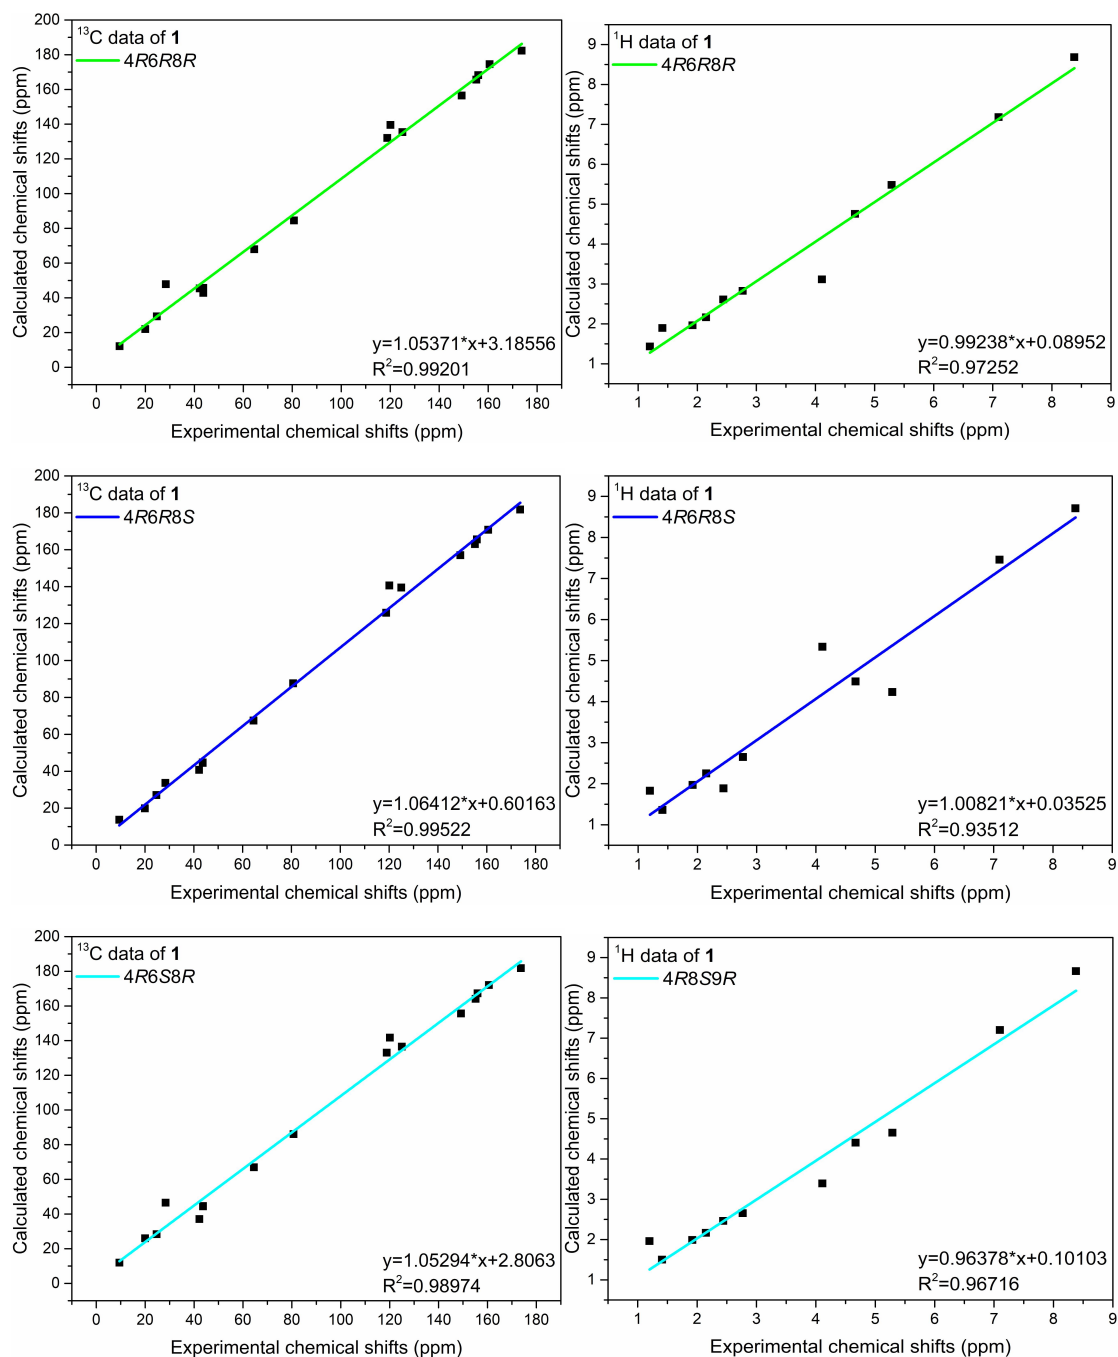

**Fig. S2** The fitting lines of experimental and calculated NMR data of **1**.

**Table S4** Chemical shifts of experimental and calculated NMR and spatial distance between H-4 and N-1'.

|                   | Chemical shift (ppm) | Spatial distance (Å) |
|-------------------|----------------------|----------------------|
| Exptl.            | 4.11                 | --                   |
| Calcd. For 4R6R8R | 3.12                 | 4.56                 |
| Calcd. For 4R6R8S | 5.33                 | 2.25                 |
| Calcd. For 4R6S8R | 3.39                 | 4.35                 |
| Calcd. For 4R6S8S | 4.45                 | 2.42                 |

|    | A          | B    | C            | D        | E           | F        | G               | H        |
|----|------------|------|--------------|----------|-------------|----------|-----------------|----------|
| 1  | Functional |      | Solvent?     |          | Basis Set   |          | Type of Data    |          |
| 2  | B3LYP      |      | PCM          |          | 6-31+G(d,p) |          | Unscaled Shifts |          |
| 3  |            |      |              |          |             |          |                 |          |
| 12 |            |      | DP4+         | 0.00%    | 0.00%       | 0.00%    | 100.00%         | -        |
| 14 | Nuclei     | sp2? | Experimental | Isomer 1 | Isomer 2    | Isomer 3 | Isomer 4        | Isomer 5 |
| 15 | C          | x    | 155.2        | 165.6309 | 163.031     | 164.0987 | 165.6045        |          |
| 16 | C          | x    | 120.1        | 139.4987 | 140.6198    | 141.7372 | 139.2584        |          |
| 17 | C          |      | 64.5         | 67.9516  | 67.441      | 66.9533  | 69.3415         |          |
| 18 | C          | x    | 160.6        | 174.5185 | 170.7675    | 172.0453 | 173.3425        |          |
| 19 | C          |      | 80.7         | 84.5074  | 87.6118     | 86.0367  | 86.2166         |          |
| 20 | C          |      | 42.2         | 45.3764  | 40.7453     | 37.0889  | 47.5415         |          |
| 21 | C          |      | 28.4         | 47.795   | 33.6546     | 46.5458  | 34.6522         |          |
| 22 | C          | x    | 125          | 135.381  | 139.5042    | 136.5257 | 134.7425        |          |
| 23 | C          | x    | 173.7        | 182.3171 | 181.7725    | 181.7933 | 181.9192        |          |
| 24 | C          |      | 9.5          | 12.1005  | 13.7195     | 11.9115  | 12.0503         |          |
| 25 | C          |      | 43.7         | 44.4804  | 46.60623745 | 44.3971  | 43.1678         |          |
| 26 | C          |      | 43.7         | 44.7492  | 42.48684755 | 44.5548  | 43.173          |          |
| 27 | C          | x    | 118.8        | 132.0331 | 125.8288    | 133.0309 | 124.326         |          |
| 28 | C          | x    | 149.2        | 156.4742 | 157.0274    | 155.6494 | 156.8612        |          |
| 29 | C          | x    | 156          | 168.1975 | 165.5414    | 167.2391 | 166.3813        |          |
| 30 | C          |      | 24.7         | 29.3018  | 27.0638     | 28.358   | 28.5173         |          |
| 31 | C          |      | 20           | 21.9811  | 19.8791     | 26.0044  | 20.9726         |          |
| 32 |            |      |              |          |             |          |                 |          |
| 33 | H          |      | 4.67         | 4.76     | 4.49        | 4.41     | 4.71            |          |
| 34 | H          |      | 5.29         | 5.48     | 4.23        | 4.65     | 5.41            |          |
| 35 | H          |      | 2.44         | 2.61     | 1.89        | 2.46     | 2.40            |          |
| 36 | H          |      | 1.2          | 1.43     | 1.83        | 1.96     | 1.13            |          |
| 37 | H          |      | 4.11         | 3.12     | 5.33        | 3.39     | 4.45            |          |
| 38 | H          |      | 1.92         | 1.96     | 1.97        | 1.99     | 1.95            |          |
| 39 | H          |      | 2.15         | 2.16     | 2.25        | 2.17     | 2.14            |          |
| 40 | H          | x    | 7.1          | 7.18     | 7.46        | 7.20     | 7.34            |          |
| 41 | H          | x    | 8.38         | 8.68     | 8.71        | 8.66     | 8.57            |          |
| 42 | H          |      | 2.77         | 2.83     | 2.65        | 2.65     | 2.83            |          |
| 43 | H          |      | 1.41         | 1.90     | 1.36        | 1.50     | 1.39            |          |
| 44 |            |      |              |          |             |          |                 |          |

  

|    | A                | B | C        | D        | E           | F        | G               | H        |
|----|------------------|---|----------|----------|-------------|----------|-----------------|----------|
| 1  | Functional       |   | Solvent? |          | Basis Set   |          | Type of Data    |          |
| 2  | B3LYP            |   | PCM      |          | 6-31+G(d,p) |          | Unscaled Shifts |          |
| 3  |                  |   |          |          |             |          |                 |          |
| 4  |                  |   | Isomer 1 | Isomer 2 | Isomer 3    | Isomer 4 | Isomer 5        | Isomer 6 |
| 5  | sDP4+ (H data)   |   | 0.00%    | 0.00%    | 0.00%       | 100.00%  | -               | -        |
| 6  | sDP4+ (C data)   |   | 0.00%    | 0.05%    | 0.00%       | 99.95%   | -               | -        |
| 7  | sDP4+ (all data) |   | 0.00%    | 0.00%    | 0.00%       | 100.00%  | -               | -        |
| 8  | uDP4+ (H data)   |   | 0.00%    | 0.00%    | 0.00%       | 100.00%  | -               | -        |
| 9  | uDP4+ (C data)   |   | 0.00%    | 1.01%    | 0.00%       | 98.99%   | -               | -        |
| 10 | uDP4+ (all data) |   | 0.00%    | 0.00%    | 0.00%       | 100.00%  | -               | -        |
| 11 | DP4+ (H data)    |   | 0.00%    | 0.00%    | 0.00%       | 100.00%  | -               | -        |
| 12 | DP4+ (C data)    |   | 0.00%    | 0.00%    | 0.00%       | 100.00%  | -               | -        |
| 13 | DP4+ (all data)  |   | 0.00%    | 0.00%    | 0.00%       | 100.00%  | -               | -        |

**Fig. S3** Detailed DP4+ probability (calculated at PCM/b3lyp/6-311+G(d,p) level) for compound 1. Isomer 1 is (4R, 6R, 8R)-**1a**, isomer 2 is (4R, 6R, 8S)-**1b**, isomer 3 is (4R, 6S, 8R)-**1c**, and isomer 4 is (4R, 6S, 8S)-**1d**.



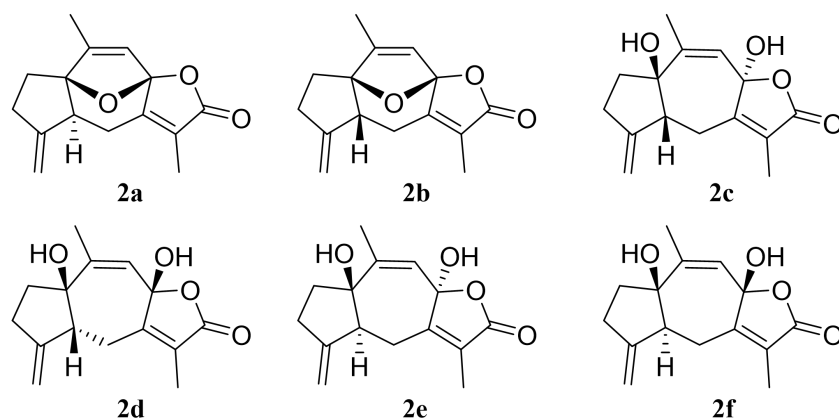

**Fig. S4.** The target structures of compound **2** for calculation.

**Table S5.** Stable conformers of compound **2** with (1*R*, 5*S*, 8*S*)-**2a** and (1*R*, 5*R*, 8*S*)-**2b** configurations, respectively.

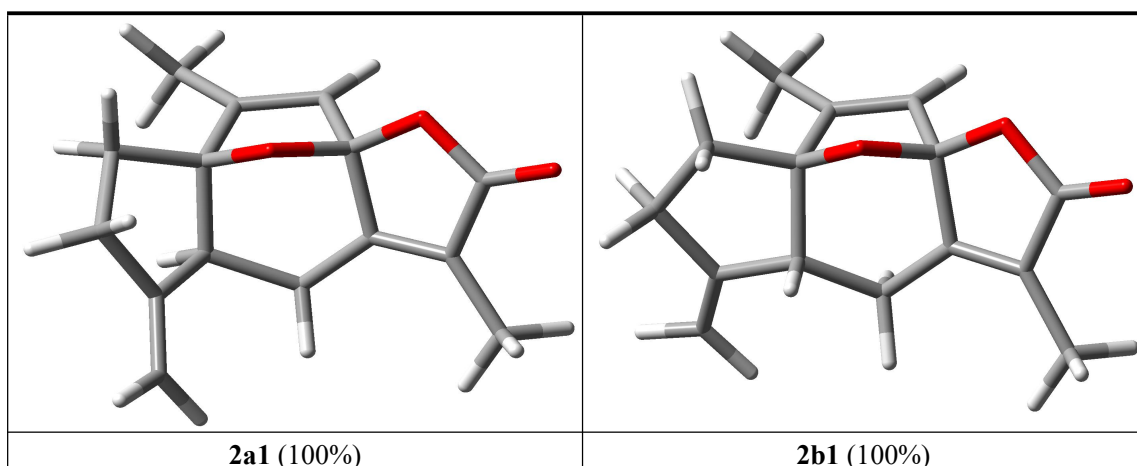

**Table S6.** Important thermodynamic parameters (a.u.) of the optimized compound **2** with simplified structures at B3LYP/6-31+G(d,p) level in the gas phase.

| conformations | E+ZPE       | G           | conformations | E+ZPE       | G           |
|---------------|-------------|-------------|---------------|-------------|-------------|
| <b>2a1</b>    | -806.605191 | -806.647421 | <b>2b1</b>    | -806.600672 | -806.642066 |

**Table S7.** Optimized Z-Matrixes of compound **2** with simplified structures in the Gas Phase (Å) at B3LYP/6-31+G(d,p) level.

| <b>2a1</b> |           |           | <b>2b1</b> |   |           |           |           |
|------------|-----------|-----------|------------|---|-----------|-----------|-----------|
| C          | -1.478349 | -0.514769 | -0.223943  | C | -1.160734 | -0.616712 | -0.543077 |
| C          | -1.401156 | 0.706664  | 0.750932   | C | -1.151928 | 0.940744  | -0.420980 |
| C          | -0.016518 | 0.842626  | 1.455138   | C | -0.039036 | 1.454740  | 0.514807  |
| C          | 1.091636  | 0.247899  | 0.635340   | C | 1.192076  | 0.622782  | 0.264289  |
| C          | 0.718212  | -0.919727 | -0.255292  | C | 0.972583  | -0.864074 | 0.005778  |
| C          | 0.058592  | -2.073440 | 0.477561   | C | 0.172736  | -1.502742 | 1.120958  |
| C          | -1.257542 | -1.843817 | 0.497976   | C | -1.117390 | -1.321382 | 0.826527  |

|   |           |           |           |   |           |           |           |
|---|-----------|-----------|-----------|---|-----------|-----------|-----------|
| C | 2.372686  | 0.567908  | 0.414736  | C | 2.497188  | 0.890241  | 0.134424  |
| C | 2.897679  | -0.380878 | -0.607188 | C | 3.185711  | -0.390614 | -0.196095 |
| O | 1.873739  | -1.241949 | -0.987290 | O | 2.239186  | -1.406007 | -0.261543 |
| C | -2.721531 | -0.233099 | -1.059574 | C | -2.384790 | -0.868840 | -1.425287 |
| C | -2.635106 | 1.287419  | -1.321567 | C | -3.408617 | 0.219011  | -0.978873 |
| C | -1.874332 | 1.861309  | -0.127662 | C | -2.605334 | 1.261800  | -0.191749 |
| C | -1.681722 | 3.157711  | 0.109528  | C | -3.107887 | 2.223186  | 0.582732  |
| O | 4.001228  | -0.453203 | -1.081152 | O | 4.356280  | -0.594855 | -0.384171 |
| C | -2.347376 | -2.623355 | 1.160114  | C | -2.318831 | -1.656714 | 1.651831  |
| C | 3.236275  | 1.660691  | 0.955486  | C | 3.270512  | 2.164725  | 0.234115  |
| O | -0.326544 | -0.433584 | -1.095950 | O | 0.101028  | -0.990933 | -1.125259 |
| H | -2.159741 | 0.555506  | 1.533383  | H | -0.895132 | 1.269370  | -1.440346 |
| H | 0.194502  | 1.887901  | 1.698351  | H | 0.160075  | 2.519424  | 0.357626  |
| H | -0.061828 | 0.307433  | 2.412272  | H | -0.353666 | 1.336828  | 1.559861  |
| H | 0.612215  | -2.875142 | 0.950644  | H | 0.611865  | -1.913243 | 2.021896  |
| H | -2.732017 | -0.832551 | -1.972987 | H | -2.084770 | -0.721893 | -2.467246 |
| H | -3.616293 | -0.479727 | -0.476546 | H | -2.774136 | -1.886213 | -1.337966 |
| H | -3.617977 | 1.751348  | -1.448985 | H | -4.202071 | -0.203453 | -0.354236 |
| H | -2.066259 | 1.472102  | -2.239080 | H | -3.903635 | 0.672425  | -1.844599 |
| H | -1.124917 | 3.513921  | 0.971662  | H | -2.467576 | 2.917159  | 1.119630  |
| H | -2.075212 | 3.920798  | -0.556143 | H | -4.179388 | 2.360842  | 0.700207  |
| H | -1.950940 | -3.494622 | 1.687271  | H | -2.031237 | -2.180646 | 2.567004  |
| H | -2.894250 | -2.007329 | 1.885566  | H | -2.868158 | -0.750968 | 1.934311  |
| H | -3.084488 | -2.973204 | 0.427487  | H | -3.018071 | -2.296116 | 1.100227  |
| H | 4.090349  | 1.244442  | 1.501192  | H | 4.024759  | 2.097353  | 1.025660  |
| H | 2.681444  | 2.316199  | 1.630984  | H | 2.619676  | 3.016186  | 0.446744  |
| H | 3.649358  | 2.263962  | 0.140550  | H | 3.811945  | 2.360397  | -0.697394 |

|    | A          | B    | C           | D        | E            | F        | G               | H        | I        |
|----|------------|------|-------------|----------|--------------|----------|-----------------|----------|----------|
| 1  | Functional |      | Solvent?    |          | Basis Set    |          | Type of Data    |          |          |
| 2  | B3LYP      |      | PCM         |          | 6-311+G(d,p) |          | Unscaled Shifts |          |          |
| 3  |            |      |             |          |              |          |                 |          |          |
| 12 |            |      | DP4+        | 99.89%   | 0.11%        | 0.00%    | 0.00%           | 0.00%    | 0.00%    |
| 14 | Nuclei     | sp2? | Experiments | Isomer 1 | Isomer 2     | Isomer 3 | Isomer 4        | Isomer 5 | Isomer 6 |
| 15 | C          |      | 95.75       | 103.16   | 99.95        | 92.05    | 92.32           | 88.99    | 89.20    |
| 16 | C          |      | 42.13       | 48.36    | 54.14        | 66.54    | 57.04           | 52.38    | 57.85    |
| 17 | C          |      | 22.45       | 27.81    | 27.64        | 36.25    | 35.62           | 29.93    | 31.36    |
| 18 | C          | x    | 154.25      | 166.72   | 167.37       | 168.42   | 170.85          | 170.27   | 169.70   |
| 19 | C          |      | 108.89      | 114.98   | 116.56       | 109.35   | 108.82          | 109.76   | 109.69   |
| 20 | C          | x    | 125.10      | 133.77   | 133.82       | 128.71   | 131.05          | 132.87   | 132.93   |
| 21 | C          | x    | 148.04      | 161.77   | 160.67       | 160.38   | 162.13          | 161.05   | 166.25   |
| 22 | C          | x    | 120.56      | 128.59   | 129.89       | 133.02   | 131.87          | 134.73   | 132.75   |
| 23 | C          | x    | 172.63      | 181.83   | 181.69       | 180.08   | 180.69          | 179.64   | 180.17   |
| 24 | C          |      | 30.47       | 34.80    | 33.32        | 41.74    | 39.55           | 41.70    | 40.52    |
| 25 | C          |      | 30.39       | 35.95    | 34.89        | 32.64    | 35.90           | 34.85    | 35.84    |
| 26 | C          | x    | 150.29      | 165.38   | 162.15       | 170.00   | 170.65          | 168.31   | 168.52   |
| 27 | C          | x    | 107.60      | 111.36   | 110.47       | 113.90   | 111.37          | 111.02   | 110.93   |
| 28 | C          |      | 13.37       | 14.68    | 16.96        | 27.73    | 24.72           | 24.50    | 24.53    |
| 29 | C          |      | 8.69        | 10.54    | 10.82        | 11.08    | 10.95           | 10.85    | 11.19    |
| 30 |            |      |             |          |              |          |                 |          |          |
| 31 | H          |      | 2.46        | 2.74     | 2.79         | 2.52     | 3.54            | 2.65     | 3.68     |
| 32 | H          |      | 2.91        | 3.10     | 3.09         | 2.85     | 2.81            | 3.00     | 2.91     |
| 33 | H          |      | 2.67        | 2.82     | 2.32         | 2.73     | 2.46            | 2.78     | 3.10     |
| 34 | H          | x    | 5.78        | 5.89     | 5.98         | 6.04     | 6.00            | 6.06     | 6.05     |
| 35 | H          |      | 2.60        | 1.88     | 2.04         | 2.19     | 2.10            | 1.82     | 2.03     |
| 36 | H          |      | 2.67        | 1.98     | 2.10         | 2.26     | 1.72            | 2.01     | 1.89     |
| 37 | H          |      | 1.99        | 2.74     | 2.57         | 2.71     | 2.45            | 2.84     | 2.51     |
| 38 | H          |      | 1.96        | 2.81     | 2.92         | 2.64     | 2.95            | 2.58     | 2.94     |
| 39 | H          | x    | 4.93        | 5.28     | 5.12         | 5.48     | 5.36            | 5.33     | 5.39     |
| 40 | H          | x    | 5.07        | 5.40     | 5.13         | 5.34     | 5.25            | 5.19     | 5.22     |
| 41 | H          |      | 1.89        | 2.00     | 1.93         | 2.01     | 2.03            | 2.03     | 1.89     |
| 42 | H          |      | 1.79        | 1.78     | 1.84         | 1.86     | 1.82            | 1.84     | 1.89     |

  

|    | A                | B | C        | D        | E            | F        | G               | H        |
|----|------------------|---|----------|----------|--------------|----------|-----------------|----------|
| 1  | Functional       |   | Solvent? |          | Basis Set    |          | Type of Data    |          |
| 2  | B3LYP            |   | PCM      |          | 6-311+G(d,p) |          | Unscaled Shifts |          |
| 3  |                  |   |          |          |              |          |                 |          |
| 4  |                  |   | Isomer 1 | Isomer 2 | Isomer 3     | Isomer 4 | Isomer 5        | Isomer 6 |
| 5  | sDP4+ (H data)   |   | 3.02%    | 0.51%    | 65.08%       | 0.01%    | 31.38%          | 0.00%    |
| 6  | sDP4+ (C data)   |   | 90.60%   | 9.40%    | 0.00%        | 0.00%    | 0.00%           | 0.00%    |
| 7  | sDP4+ (all data) |   | 98.27%   | 1.73%    | 0.00%        | 0.00%    | 0.00%           | 0.00%    |
| 8  | uDP4+ (H data)   |   | 0.11%    | 0.07%    | 98.82%       | 0.01%    | 0.98%           | 0.00%    |
| 9  | uDP4+ (C data)   |   | 91.07%   | 8.93%    | 0.00%        | 0.00%    | 0.00%           | 0.00%    |
| 10 | uDP4+ (all data) |   | 94.01%   | 5.99%    | 0.00%        | 0.00%    | 0.00%           | 0.00%    |
| 11 | DP4+ (H data)    |   | 0.01%    | 0.00%    | 99.52%       | 0.00%    | 0.47%           | 0.00%    |
| 12 | DP4+ (C data)    |   | 98.99%   | 1.01%    | 0.00%        | 0.00%    | 0.00%           | 0.00%    |
| 13 | DP4+ (all data)  |   | 99.89%   | 0.11%    | 0.00%        | 0.00%    | 0.00%           | 0.00%    |

**Fig. S5.** Detailed DP4+ probability (calculated at PCM/b3lyp/6-311+G(d,p) level) for compound 2. Isomer 1 is (1*R*, 5*S*, 8*S*)-**2a**, isomer 2 is (1*R*, 5*R*, 8*S*)-**2b**, isomer 3 is (1*R*, 5*R*, 8*R*)-**2c**, isomer 4 is (1*R*, 5*R*, 8*S*)-**2d**, isomer 5 is (1*R*, 5*S*, 8*R*)-**2e**, isomer 6 is (1*R*, 5*S*, 8*S*)-**2f**.

**Table S8.** Stable conformers of compound **3** with (1*S*, 4*R*, 8*R*, 10*R*)-**3a** and(1*R*, 4*S*, 8*S*, 10*S*)-**3b** configurations, respectively.

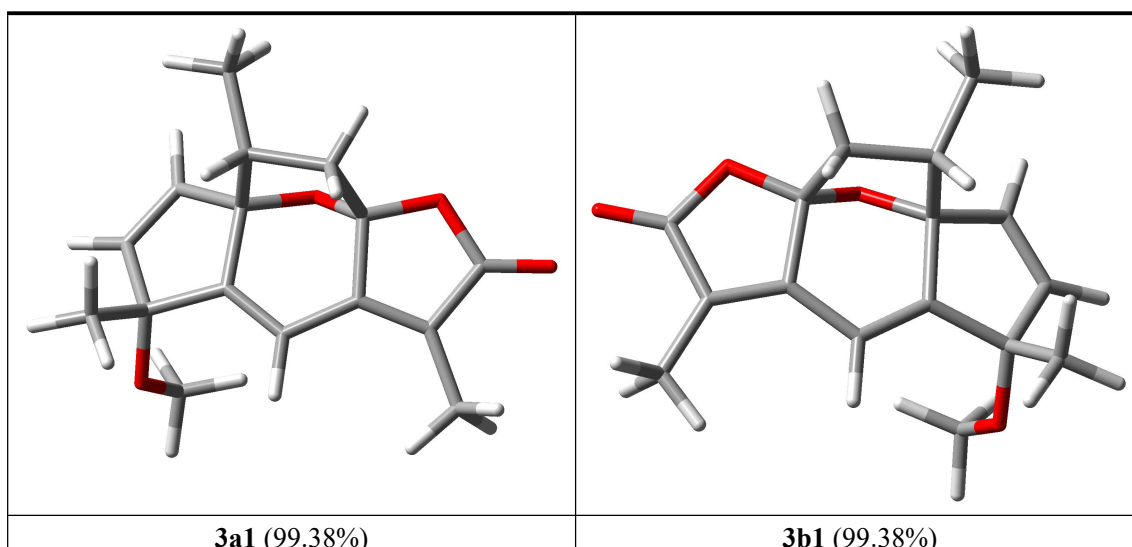

**Table S9.** Important thermodynamic parameters (a.u.) of the optimized compound **3** with simplified structures at B3LYP/6-31+G(d,p) level in the gas phase.

| NO.        | E+ZPE       | G           | NO.        | E+ZPE       | G           |
|------------|-------------|-------------|------------|-------------|-------------|
| <b>3a1</b> | -921.104802 | -921.149688 | <b>3b1</b> | -921.104802 | -921.149688 |

**Table S10.** Optimized Z-Matrixes of compound **3** with simplified structures in the Gas Phase (Å) at B3LYP/6-31+G(d,p) level.

| <b>3a1</b> |           |           | <b>3b1</b> |   |           |           |           |
|------------|-----------|-----------|------------|---|-----------|-----------|-----------|
| C          | -0.834277 | 0.982343  | -0.329107  | C | 0.834277  | 0.982343  | -0.329107 |
| C          | -1.069920 | -0.364933 | 0.351658   | C | 1.069920  | -0.364933 | 0.351658  |
| C          | -0.034303 | -1.135482 | 0.733374   | C | 0.034303  | -1.135482 | 0.733374  |
| C          | 1.290009  | -0.633095 | 0.431029   | C | -1.290009 | -0.633095 | 0.431029  |
| C          | 1.362772  | 0.781877  | -0.118538  | C | -1.362772 | 0.781877  | -0.118538 |
| C          | 1.019570  | 1.887487  | 0.908759   | C | -1.019570 | 1.887487  | 0.908759  |
| C          | -0.499401 | 2.112087  | 0.712574   | C | 0.499401  | 2.112087  | 0.712574  |
| C          | 2.514806  | -1.189883 | 0.361241   | C | -2.514806 | -1.189883 | 0.361241  |
| C          | 3.401027  | -0.218305 | -0.328911  | C | -3.401027 | -0.218305 | -0.328911 |
| O          | 2.661629  | 0.917522  | -0.642373  | O | -2.661629 | 0.917522  | -0.642373 |
| C          | -2.092736 | 1.148006  | -1.135185  | C | 2.092736  | 1.148006  | -1.135185 |
| C          | -3.022336 | 0.250942  | -0.792561  | C | 3.022336  | 0.250942  | -0.792561 |
| C          | -2.548759 | -0.730968 | 0.274271   | C | 2.548759  | -0.730968 | 0.274271  |
| C          | -0.823312 | 3.518106  | 0.198497   | C | 0.823312  | 3.518106  | 0.198497  |
| O          | 4.564644  | -0.322466 | -0.620429  | O | -4.564644 | -0.322466 | -0.620429 |
| C          | 3.015957  | -2.537698 | 0.761622   | C | -3.015957 | -2.537698 | 0.761622  |
| C          | -3.286448 | -0.539654 | 1.607879   | C | 3.286448  | -0.539654 | 1.607879  |
| O          | 0.367626  | 0.931612  | -1.133000  | O | -0.367626 | 0.931612  | -1.133000 |

|   |           |           |           |   |           |           |           |
|---|-----------|-----------|-----------|---|-----------|-----------|-----------|
| O | -2.777021 | -2.102933 | -0.057838 | O | 2.777021  | -2.102933 | -0.057838 |
| C | -2.333129 | -2.528877 | -1.340980 | C | 2.333129  | -2.528877 | -1.340980 |
| H | -0.181534 | -2.141576 | 1.116402  | H | 0.181534  | -2.141576 | 1.116402  |
| H | 1.594203  | 2.778704  | 0.644143  | H | -1.594203 | 2.778704  | 0.644143  |
| H | 1.292696  | 1.595213  | 1.925327  | H | -1.292696 | 1.595213  | 1.925327  |
| H | -1.051865 | 1.930551  | 1.639865  | H | 1.051865  | 1.930551  | 1.639865  |
| H | -2.214055 | 1.947986  | -1.856602 | H | 2.214055  | 1.947986  | -1.856602 |
| H | -4.032251 | 0.205472  | -1.188747 | H | 4.032251  | 0.205472  | -1.188747 |
| H | -0.463997 | 4.273448  | 0.904773  | H | 0.463997  | 4.273448  | 0.904773  |
| H | -1.900593 | 3.665379  | 0.072832  | H | 1.900593  | 3.665379  | 0.072832  |
| H | -0.334205 | 3.699726  | -0.764159 | H | 0.334205  | 3.699726  | -0.764159 |
| H | 2.231575  | -3.139051 | 1.227052  | H | -2.231575 | -3.139051 | 1.227052  |
| H | 3.403268  | -3.079653 | -0.108012 | H | -3.403268 | -3.079653 | -0.108012 |
| H | 3.848979  | -2.445464 | 1.467188  | H | -3.848979 | -2.445464 | 1.467188  |
| H | -4.354369 | -0.731368 | 1.468751  | H | 4.354369  | -0.731368 | 1.468751  |
| H | -2.901336 | -1.248682 | 2.345670  | H | 2.901336  | -1.248682 | 2.345670  |
| H | -3.157007 | 0.476634  | 1.988404  | H | 3.157007  | 0.476634  | 1.988404  |
| H | -2.552365 | -3.597348 | -1.395659 | H | 2.552365  | -3.597348 | -1.395659 |
| H | -2.863481 | -2.015247 | -2.152607 | H | 2.863481  | -2.015247 | -2.152607 |
| H | -1.255793 | -2.376320 | -1.479226 | H | 1.255793  | -2.376320 | -1.479226 |

**Table S11.** Stable conformers of compound **4** with (1*R*, 5*S*, 8*S*, 10*R*)-**4a** and (1*S*, 5*R*, 8*R*, 10*S*)-**4b** configurations, respectively.

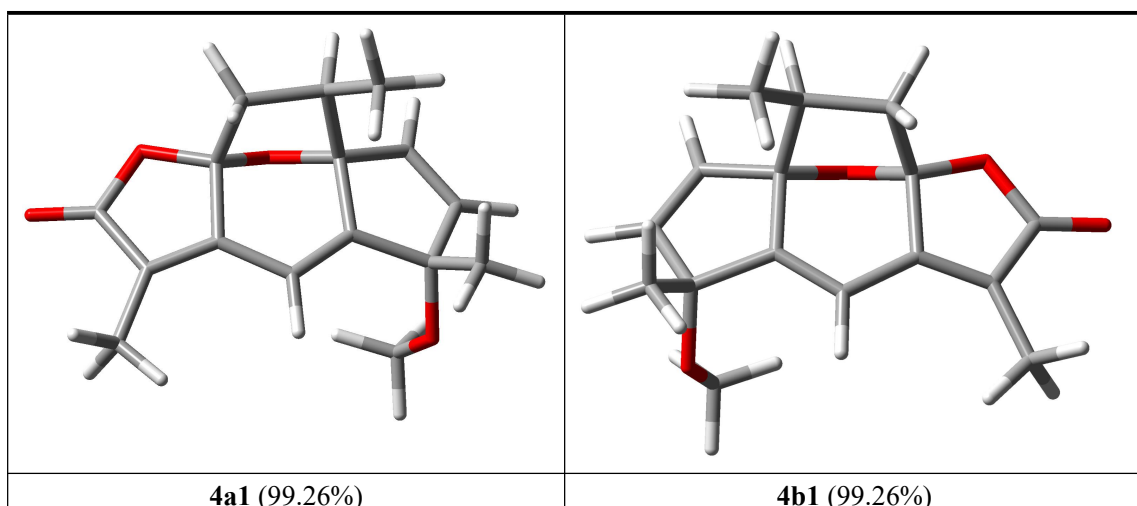

**Table S12.** Important thermodynamic parameters (a.u.) of the optimized compound **4** at B3LYP/6-31+G(d,p) level in the gas phase.

| NO.       | E+ZPE       | G           | NO.       | E+ZPE       | G           |
|-----------|-------------|-------------|-----------|-------------|-------------|
| <b>4a</b> | -921.103880 | -921.148568 | <b>4b</b> | -921.103880 | -921.148568 |

**Table S13.** Optimized Z-Matrixes of compound **4** with simplified structures in the Gas Phase (Å) at B3LYP/6-31+G(d,p) level.

| 4a1 |           |           |           | 4b1 |           |           |           |
|-----|-----------|-----------|-----------|-----|-----------|-----------|-----------|
| C   | 0.819684  | 0.977039  | -0.587258 | C   | -0.819684 | 0.977039  | -0.587258 |
| C   | 1.062314  | -0.233212 | 0.314844  | C   | -1.062314 | -0.233212 | 0.314844  |
| C   | 0.025681  | -0.910136 | 0.846250  | C   | -0.025681 | -0.910136 | 0.846250  |
| C   | -1.302082 | -0.456543 | 0.487804  | C   | 1.302082  | -0.456543 | 0.487804  |
| C   | -1.378394 | 0.823125  | -0.329264 | C   | 1.378394  | 0.823125  | -0.329264 |
| C   | -1.028036 | 2.103543  | 0.468169  | C   | 1.028036  | 2.103543  | 0.468169  |
| C   | 0.472778  | 2.309031  | 0.162586  | C   | -0.472778 | 2.309031  | 0.162586  |
| C   | -2.529012 | -1.010544 | 0.543485  | C   | 2.529012  | -1.010544 | 0.543485  |
| C   | -3.420143 | -0.191985 | -0.318242 | C   | 3.420143  | -0.191985 | -0.318242 |
| O   | -2.681181 | 0.853896  | -0.860591 | O   | 2.681181  | 0.853896  | -0.860591 |
| C   | 2.069894  | 1.006411  | -1.419472 | C   | -2.069894 | 1.006411  | -1.419472 |
| C   | 2.993405  | 0.152458  | -0.967477 | C   | -2.993405 | 0.152458  | -0.967477 |
| C   | 2.519183  | -0.684514 | 0.215892  | C   | -2.519183 | -0.684514 | 0.215892  |
| C   | 1.337175  | 2.671152  | 1.366535  | C   | -1.337175 | 2.671152  | 1.366535  |
| O   | -4.586953 | -0.347933 | -0.571480 | O   | 4.586953  | -0.347933 | -0.571480 |
| C   | -3.029597 | -2.249398 | 1.208849  | C   | 3.029597  | -2.249398 | 1.208849  |
| C   | 3.342664  | -0.439563 | 1.487065  | C   | -3.342664 | -0.439563 | 1.487065  |
| O   | -0.390111 | 0.765657  | -1.359734 | O   | 0.390111  | 0.765657  | -1.359734 |
| O   | 2.644235  | -2.095957 | -0.002120 | O   | -2.644235 | -2.095957 | -0.002120 |
| C   | 2.105075  | -2.605554 | -1.216646 | C   | -2.105075 | -2.605554 | -1.216646 |
| H   | 0.170853  | -1.849334 | 1.373307  | H   | -0.170853 | -1.849334 | 1.373307  |
| H   | -1.644962 | 2.924959  | 0.097991  | H   | 1.644962  | 2.924959  | 0.097991  |
| H   | -1.229875 | 1.977821  | 1.535636  | H   | 1.229875  | 1.977821  | 1.535636  |
| H   | 0.571388  | 3.097784  | -0.592385 | H   | -0.571388 | 3.097784  | -0.592385 |
| H   | 2.189977  | 1.701836  | -2.243911 | H   | -2.189977 | 1.701836  | -2.243911 |
| H   | 3.995395  | 0.035643  | -1.369274 | H   | -3.995395 | 0.035643  | -1.369274 |
| H   | 2.391903  | 2.762650  | 1.087400  | H   | -2.391903 | 2.762650  | 1.087400  |
| H   | 1.022976  | 3.632349  | 1.785470  | H   | -1.022976 | 3.632349  | 1.785470  |
| H   | 1.253431  | 1.920176  | 2.158524  | H   | -1.253431 | 1.920176  | 2.158524  |
| H   | -2.240054 | -2.755402 | 1.769276  | H   | 2.240054  | -2.755402 | 1.769276  |
| H   | -3.437080 | -2.946947 | 0.469096  | H   | 3.437080  | -2.946947 | 0.469096  |
| H   | -3.848199 | -2.012773 | 1.897529  | H   | 3.848199  | -2.012773 | 1.897529  |
| H   | 3.316505  | 0.609729  | 1.785697  | H   | -3.316505 | 0.609729  | 1.785697  |
| H   | 4.381359  | -0.733066 | 1.310058  | H   | -4.381359 | -0.733066 | 1.310058  |
| H   | 2.947833  | -1.052046 | 2.302373  | H   | -2.947833 | -1.052046 | 2.302373  |
| H   | 2.222133  | -3.690209 | -1.164941 | H   | -2.222133 | -3.690209 | -1.164941 |
| H   | 2.643597  | -2.231538 | -2.096336 | H   | -2.643597 | -2.231538 | -2.096336 |
| H   | 1.041352  | -2.364808 | -1.332822 | H   | -1.041352 | -2.364808 | -1.332822 |

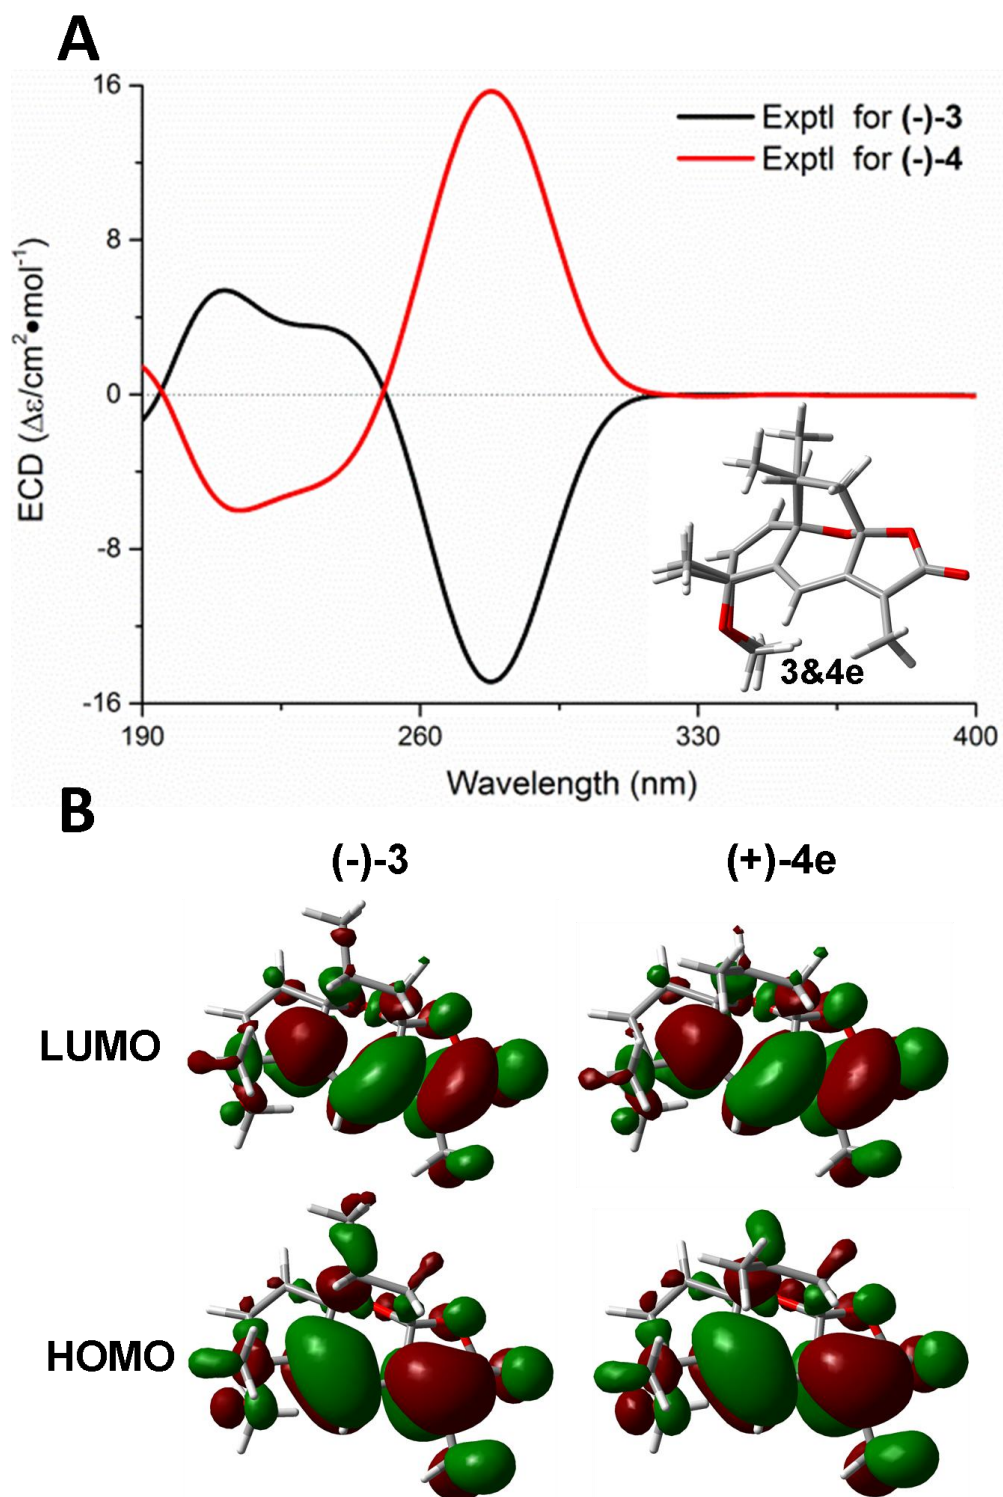

**Fig. S6** (A) Experimental ECD spectra of **3-4**; (B) optimal conformations and MOs of **3** and **4e** (the enantiomer of **4**).

20120827-C-5-4-2\_120823100307 #26-29 RT: 0.62-0.69 AV: 4 NL: 4.99E8

T: FTMS + p ESI Full ms [100.00-1000.00]

287.1756

 $C_{17}H_{23}O_2N_2 = 287.1754$ 

0.8528 ppm

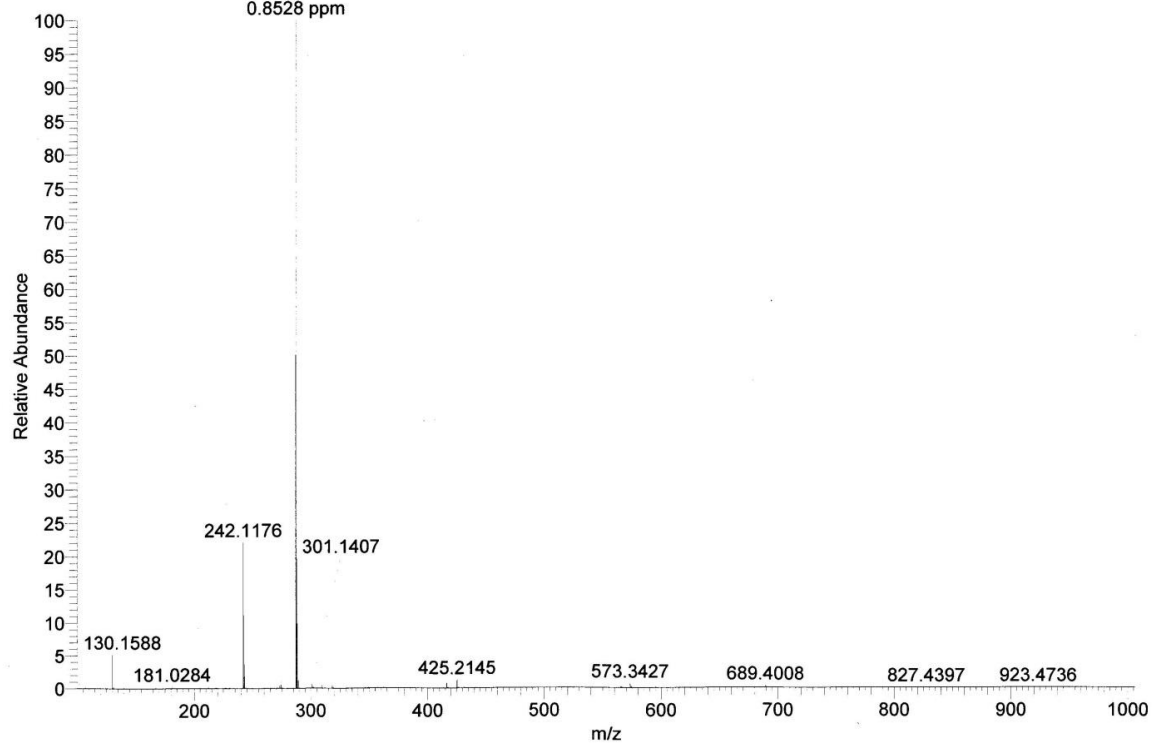

Fig. S7. HRESIMS spectrum of compound 1.

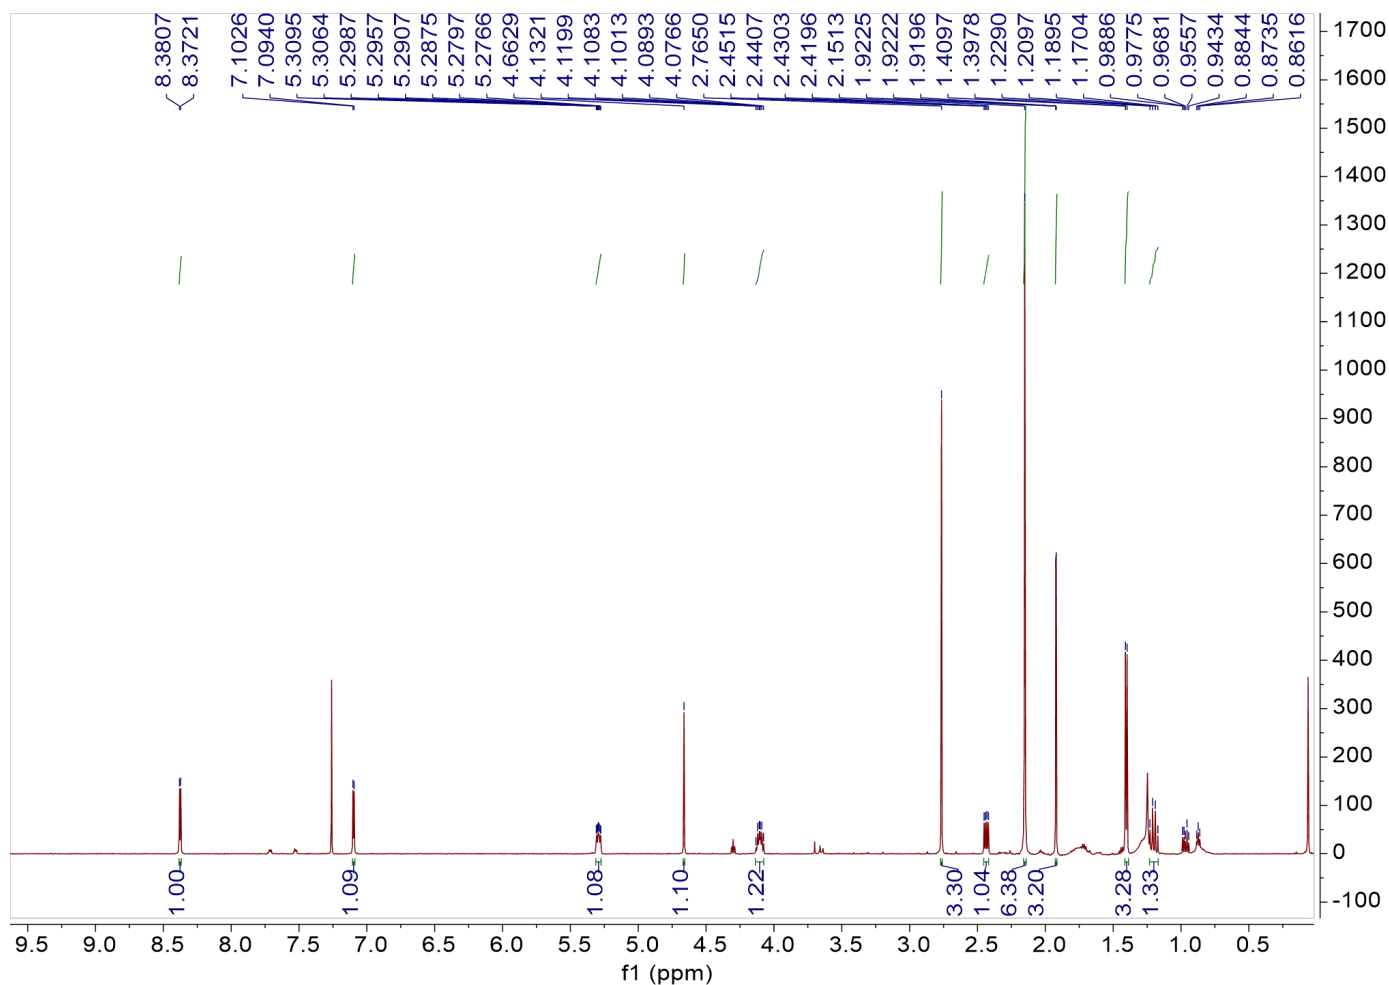Fig. S8.  $^1H$  NMR spectrum of compound 1 in  $CDCl_3$ .



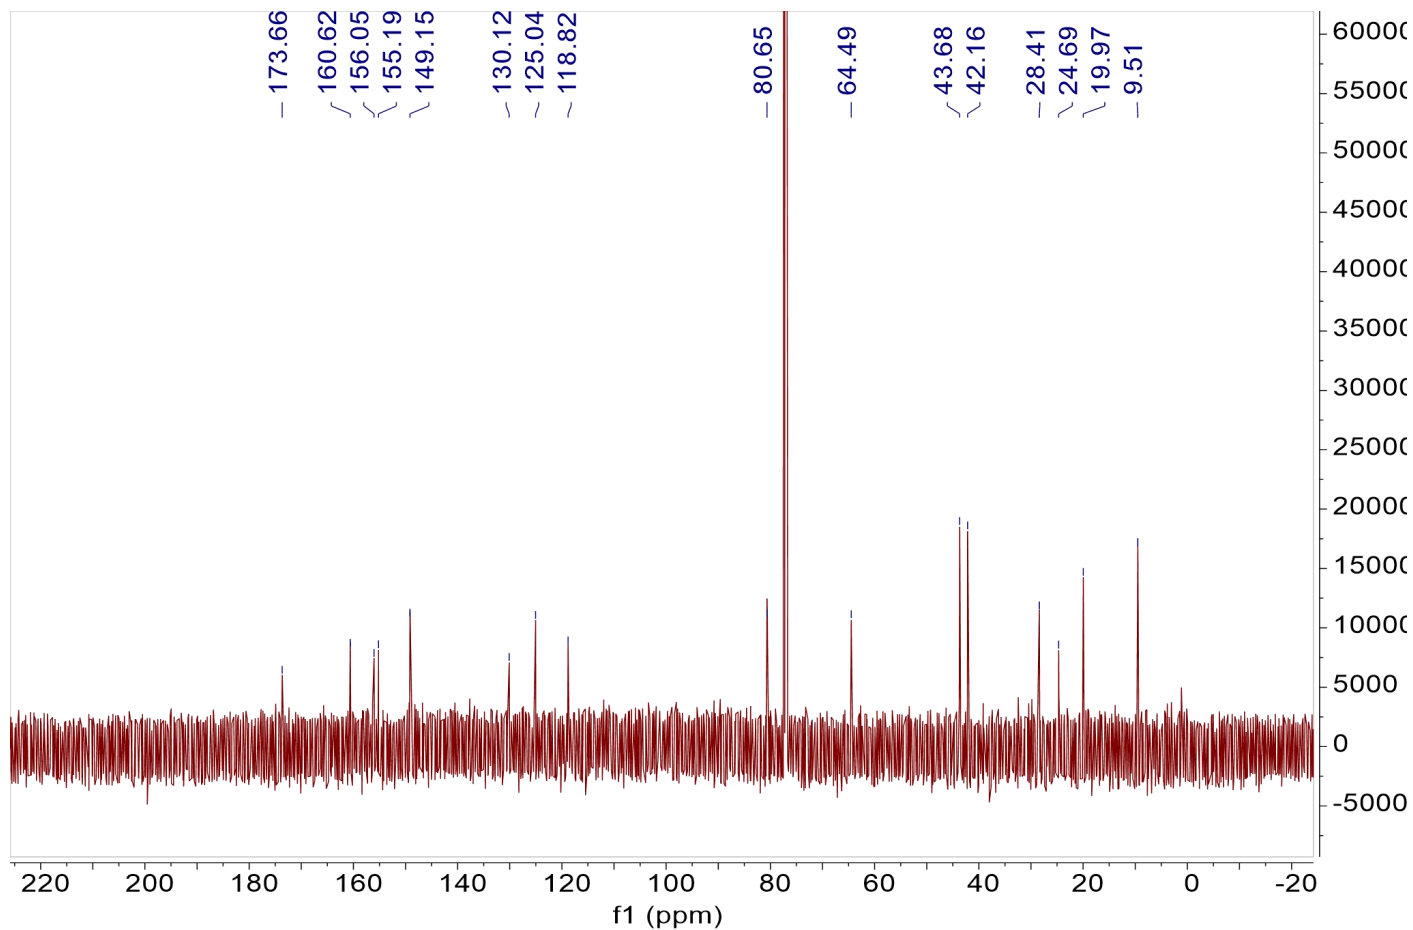

Fig. S9.  $^{13}\text{C}$  NMR spectrum of compound **1** in  $\text{CDCl}_3$ .

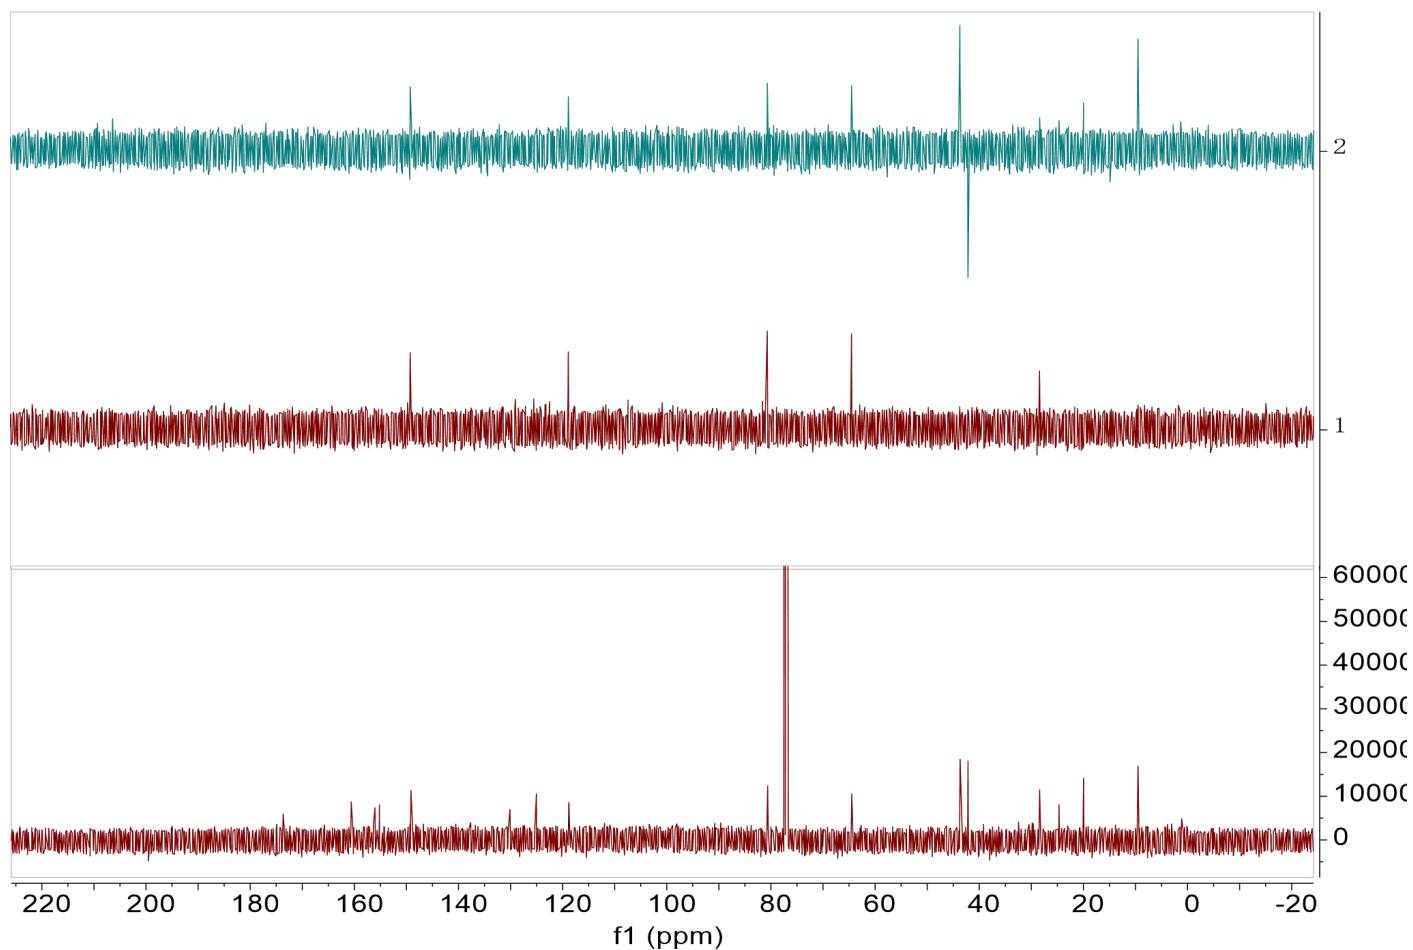

Fig. S10.  $^{13}\text{C}$  and DEPT spectrum of compound **1** in  $\text{CDCl}_3$ .

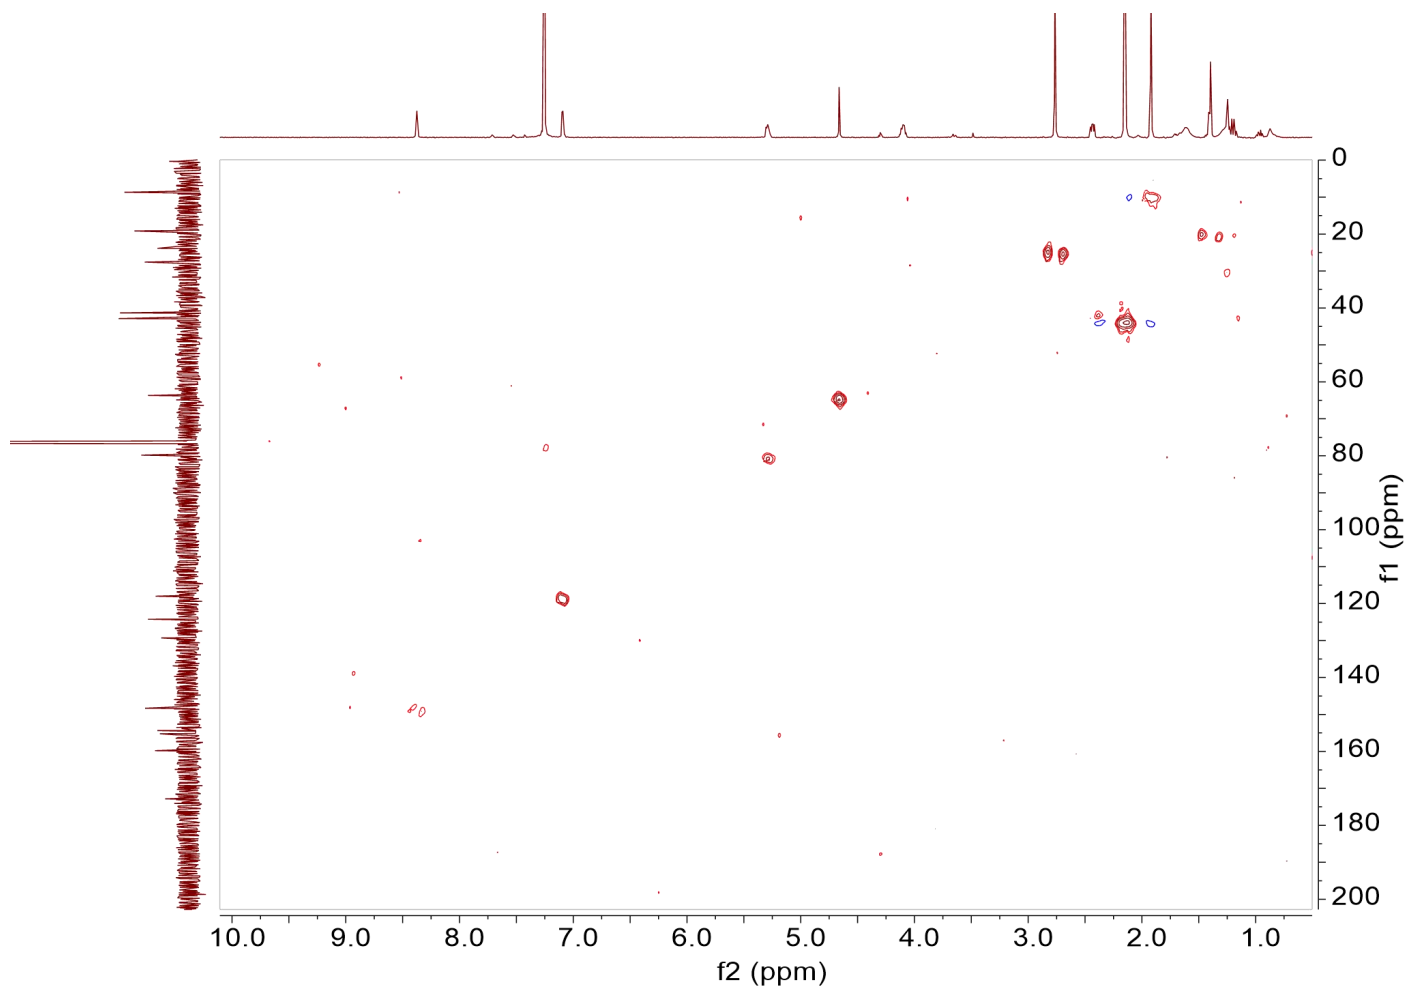

Fig. S11. HSQC spectrum of compound **1** in CDCl<sub>3</sub>.

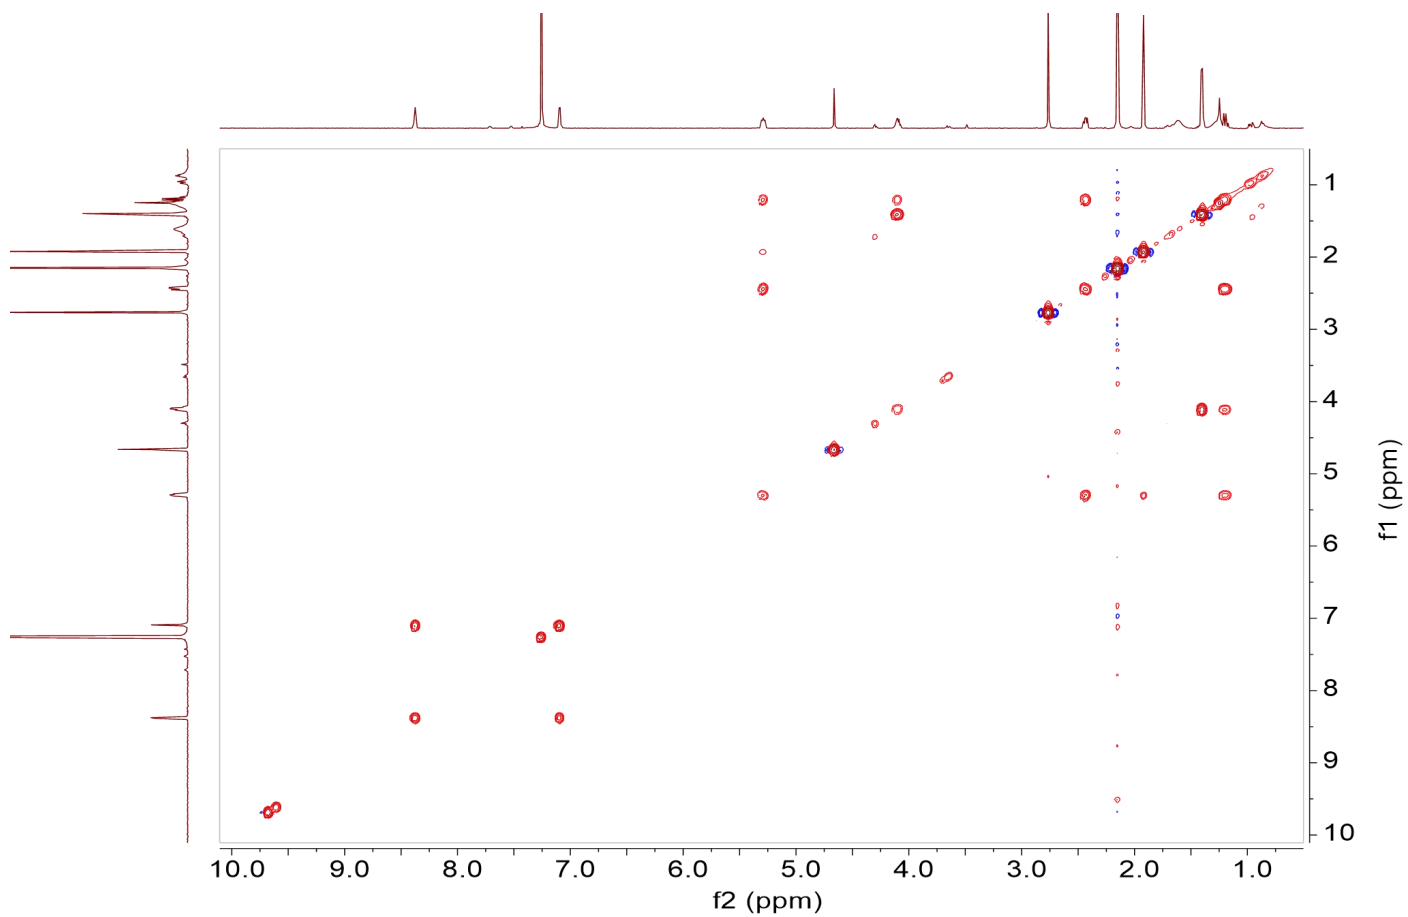

Fig. S12. <sup>1</sup>H-<sup>1</sup>H-COSY spectrum of compound **1** in CDCl<sub>3</sub>.

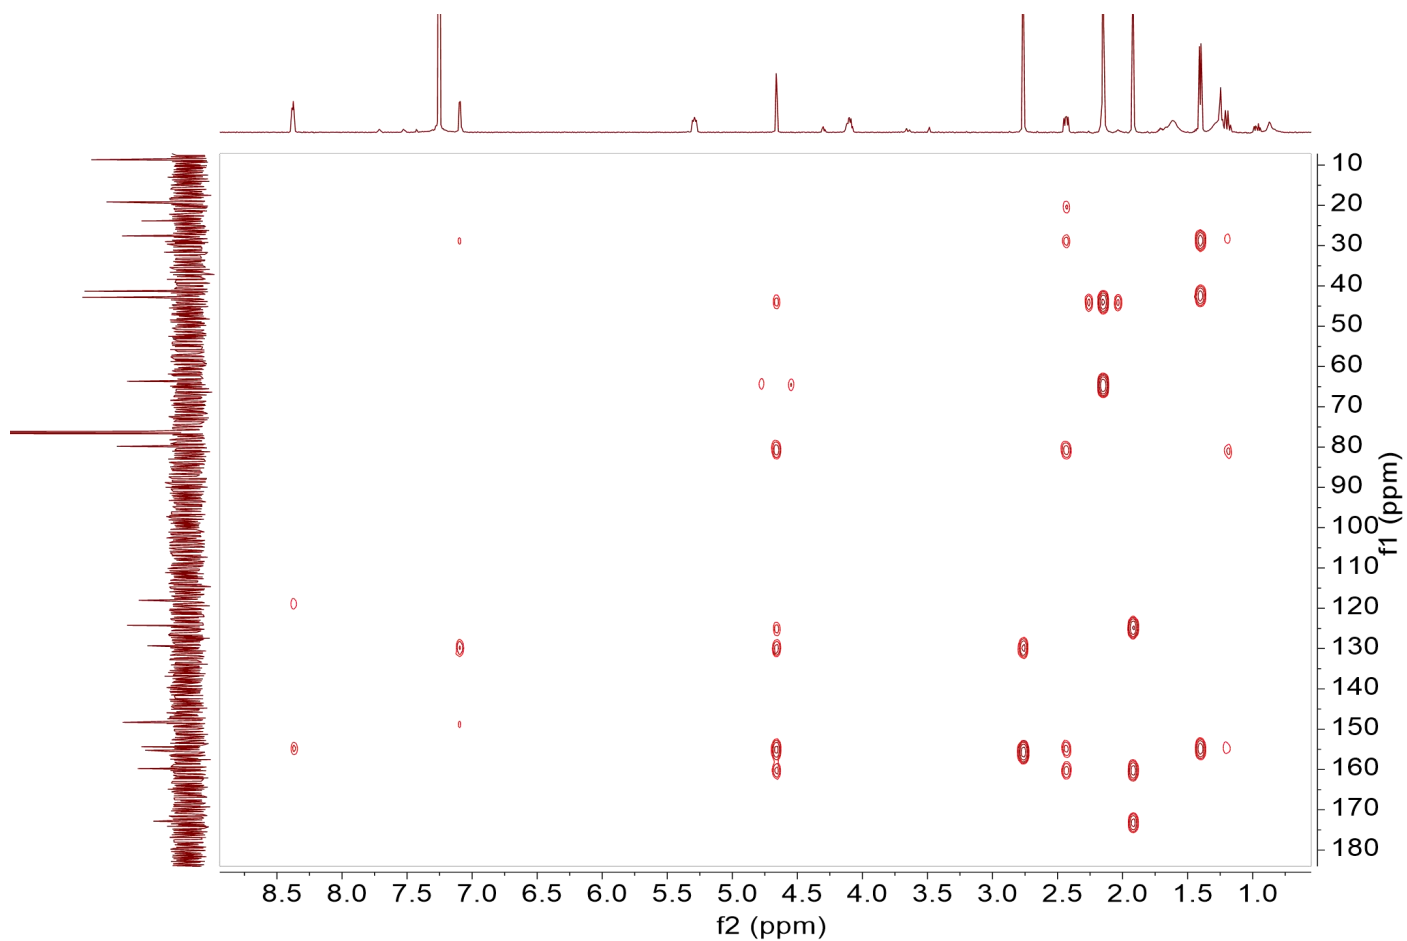

Fig. S13. HMBC spectrum of compound **1** in CDCl<sub>3</sub>.

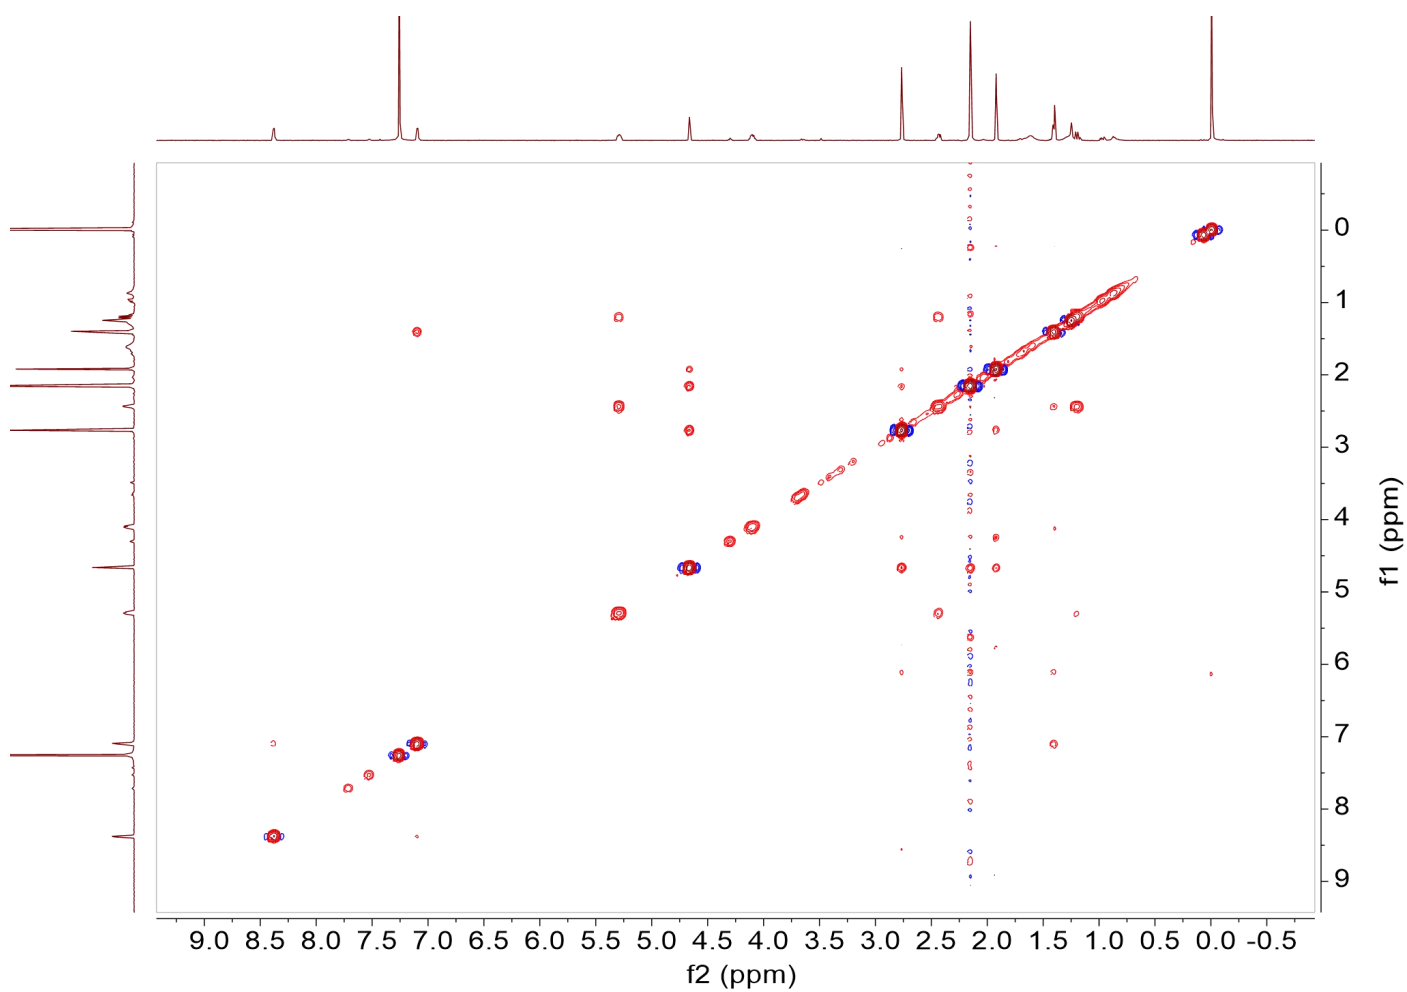

Fig. S14. NOESY spectrum of compound **1** in CDCl<sub>3</sub>.

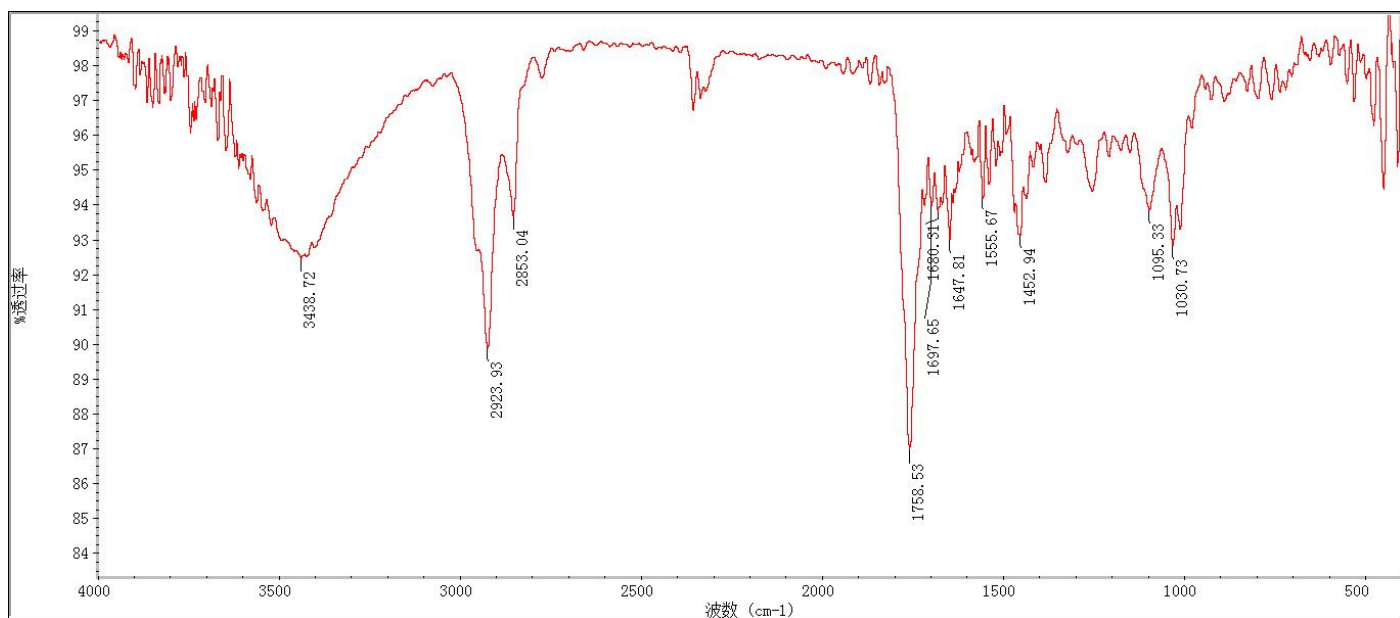

Fig. S15. IR spectrum of compound 1.

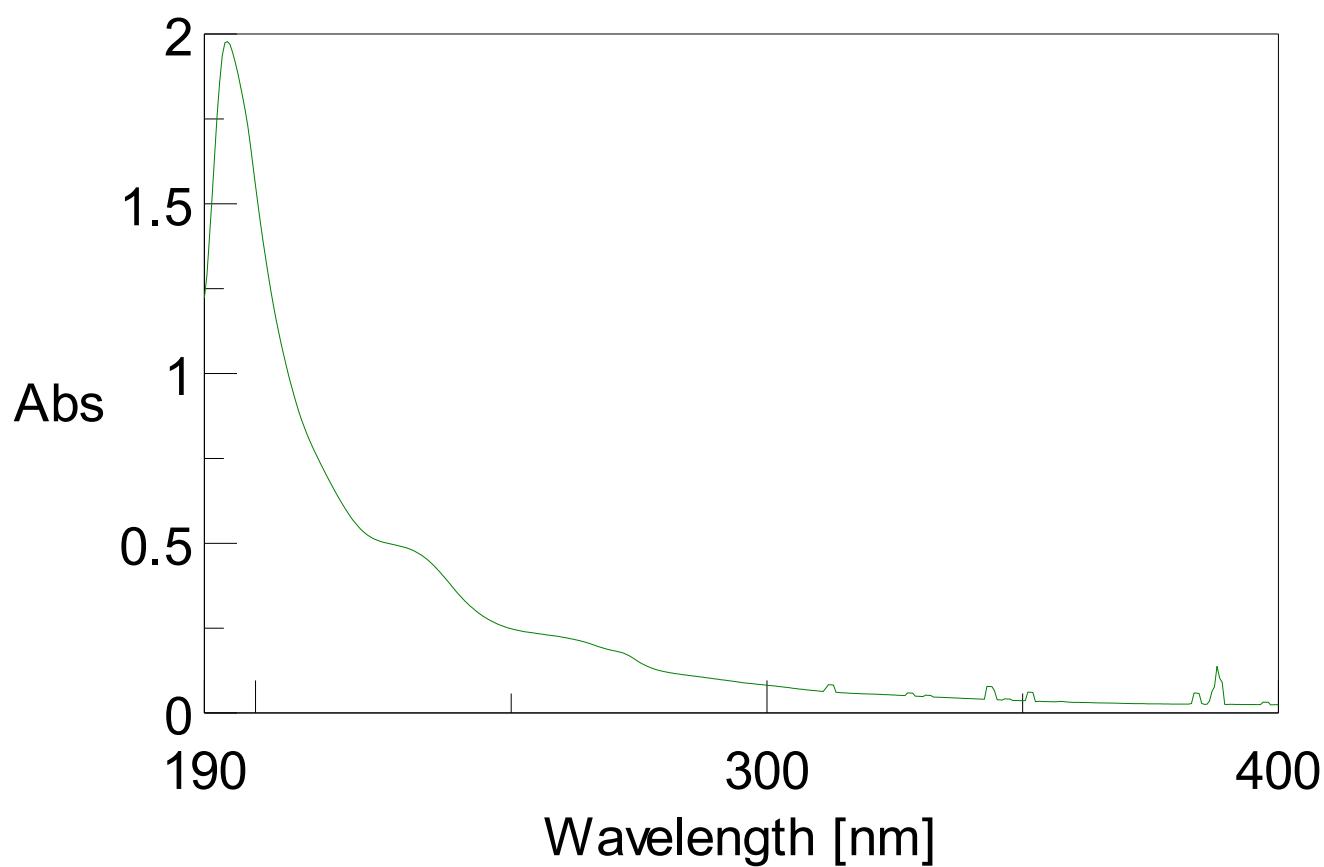

Fig. S16. UV spectrum of compound 1.

20130115-B5-1-2\_130115152249 #54-60 RT: 1.40-1.55 AV: 7 NL: 7.64E6  
T: FTMS + c ESI Full ms [100.00-1000.00]

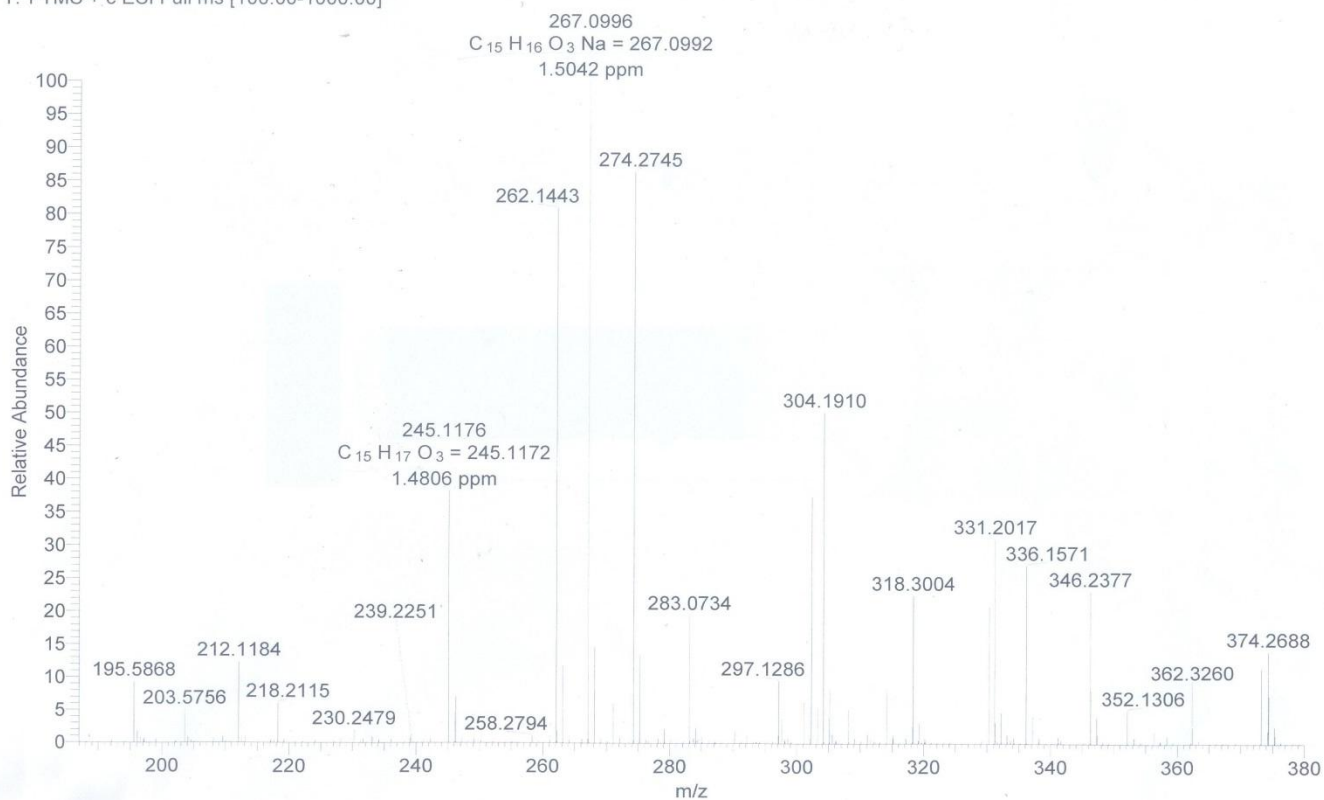

Fig. S17. HRESIMS spectrum of compound 2.

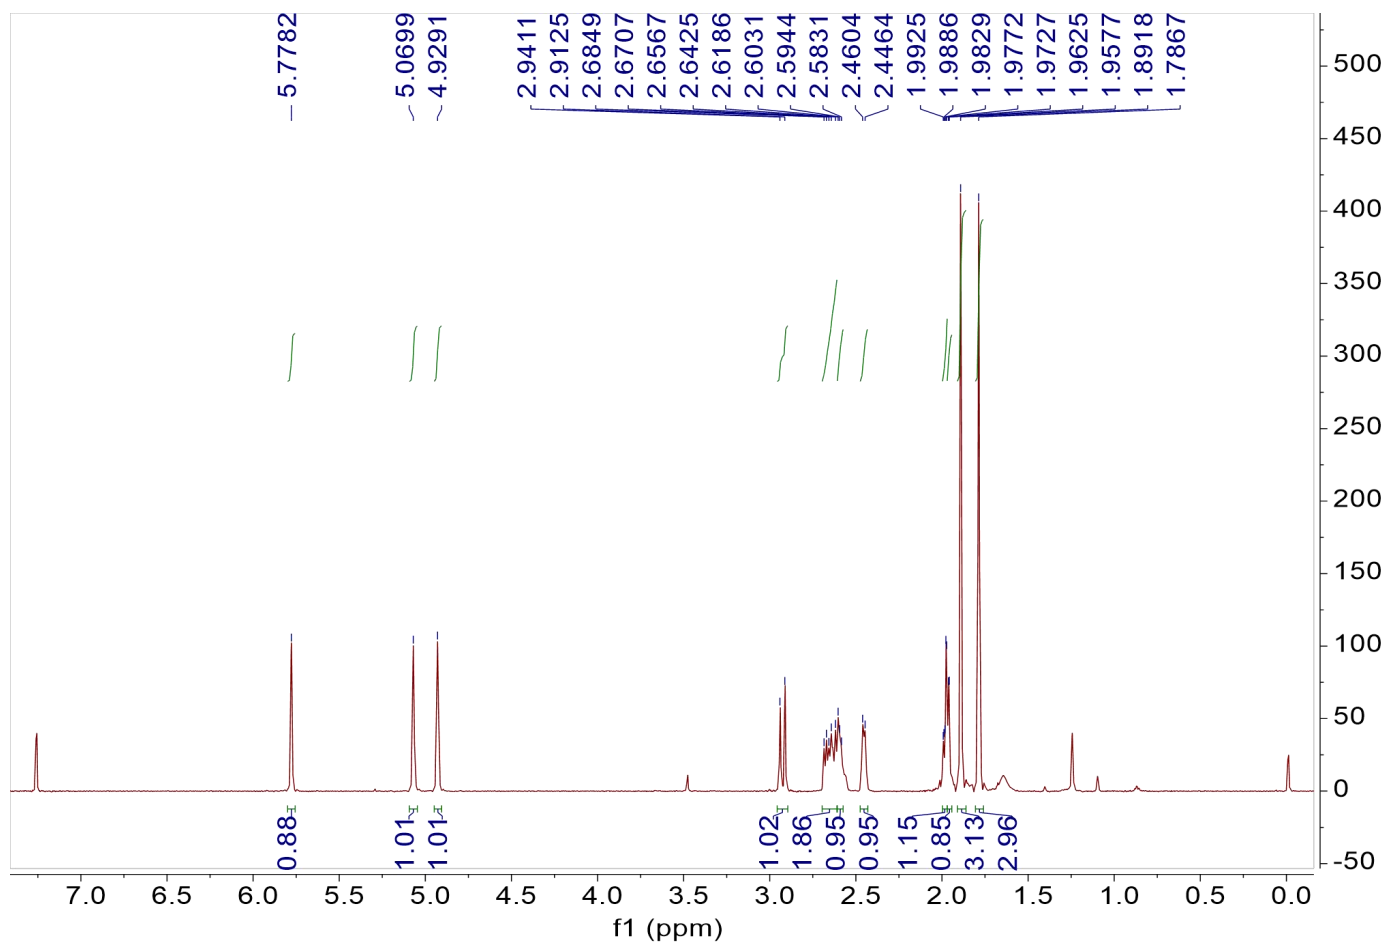

Fig. S18.  $^1H$  NMR spectrum of compound 2 in  $CDCl_3$ .

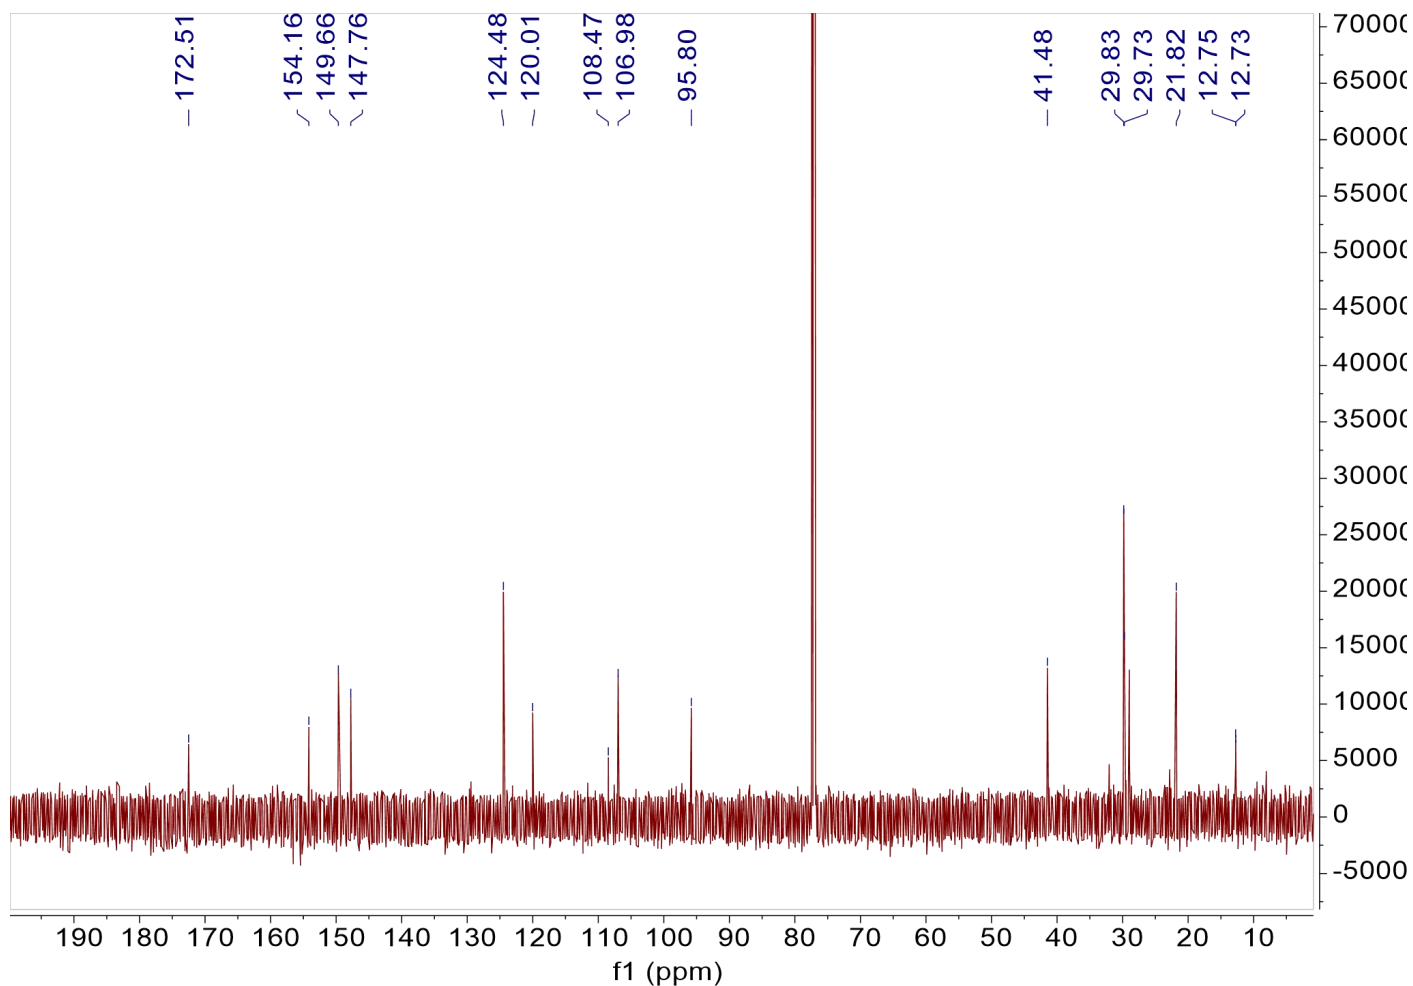

Fig. S19.  $^{13}\text{C}$  NMR spectrum of compound **2** in  $\text{CDCl}_3$ .

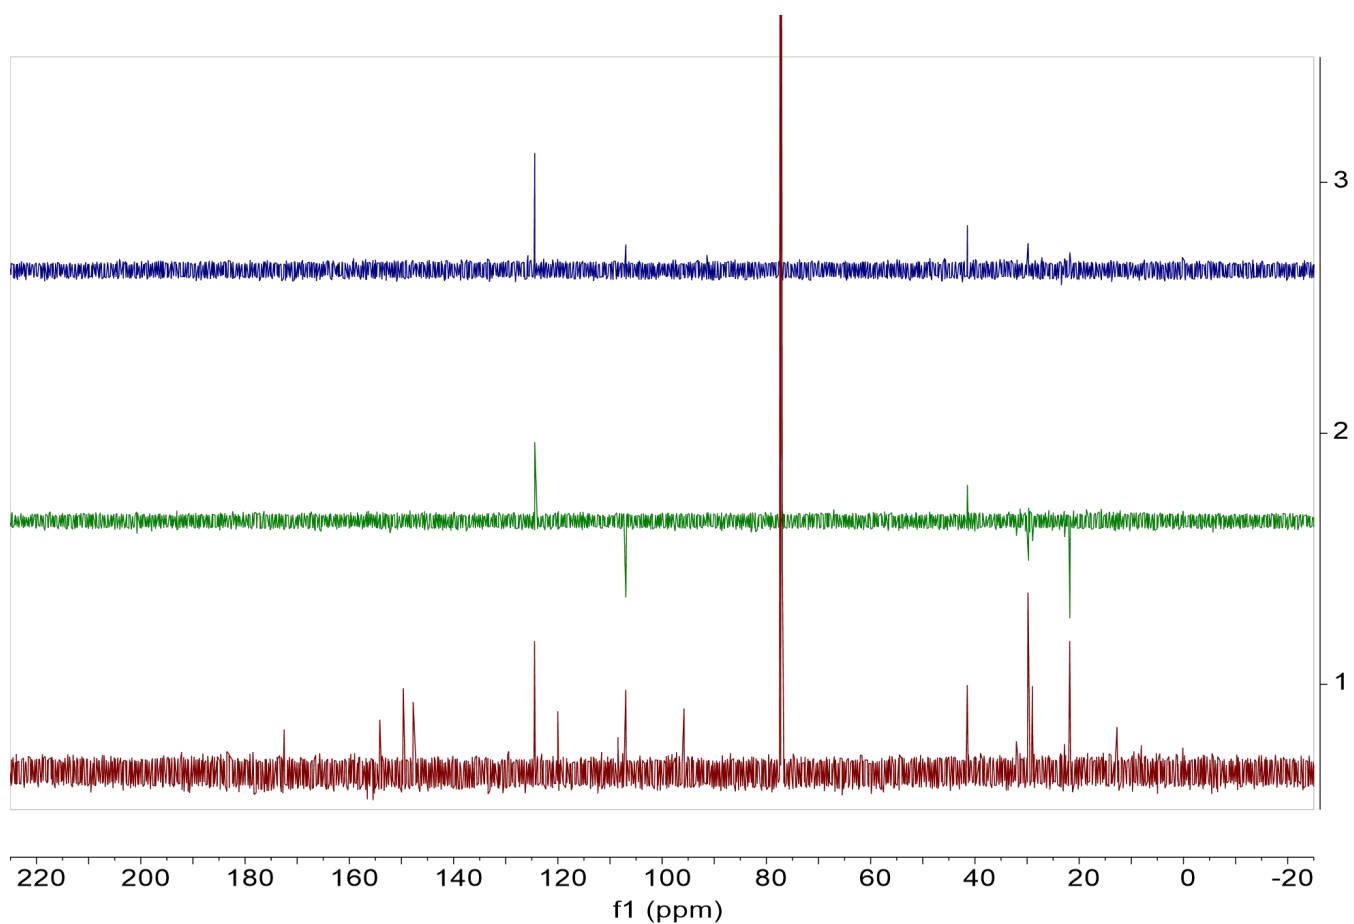

Fig. S20.  $^{13}\text{C}$  and DEPT spectrum of compound **2** in  $\text{CDCl}_3$ .

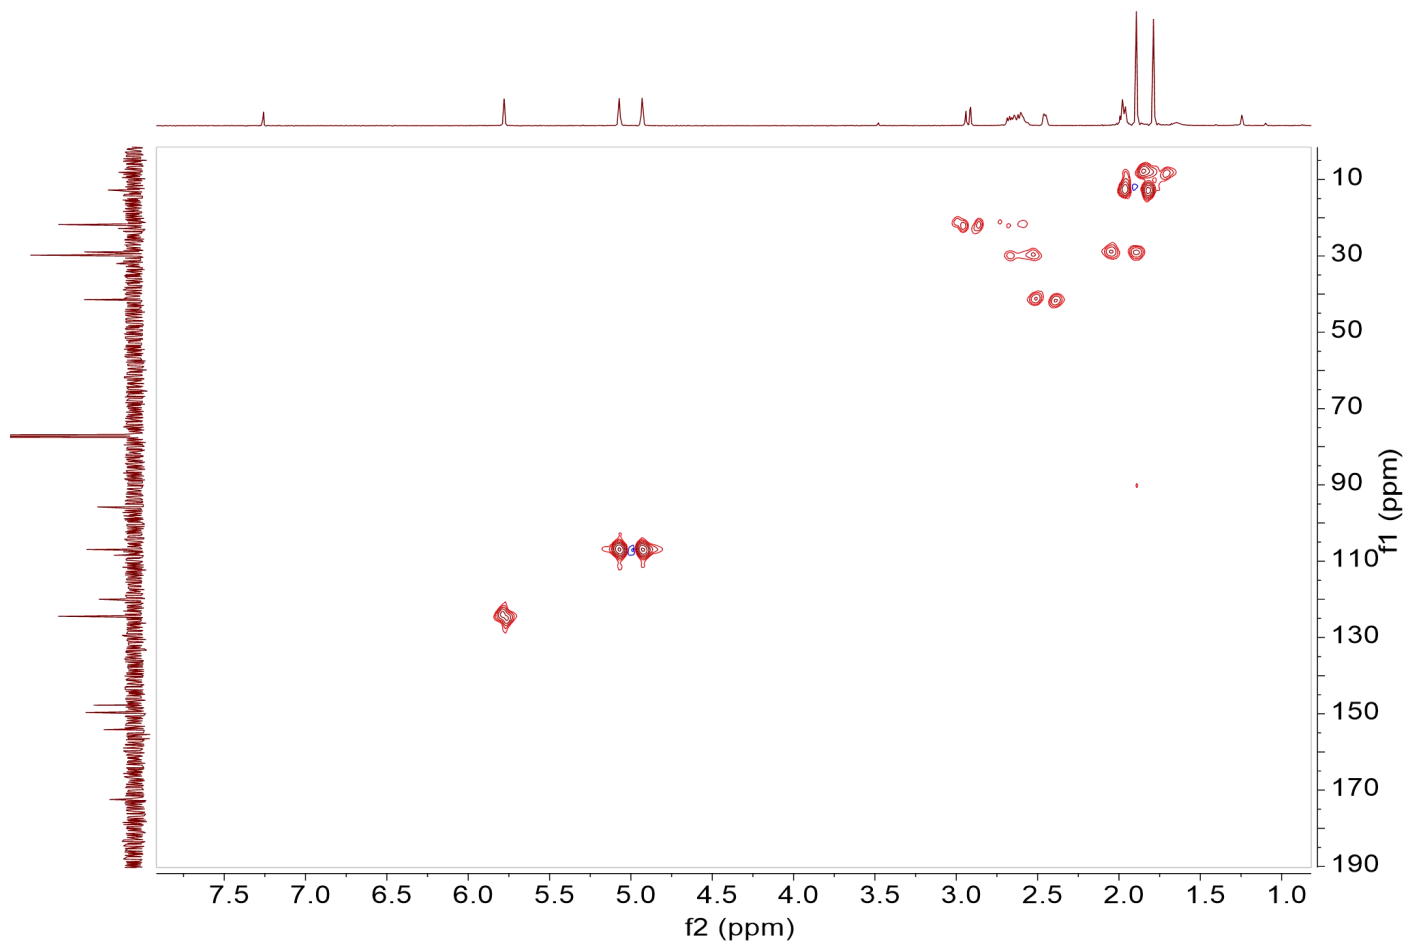

Fig. S21. HSQC spectrum of compound **2** in  $\text{CDCl}_3$ .

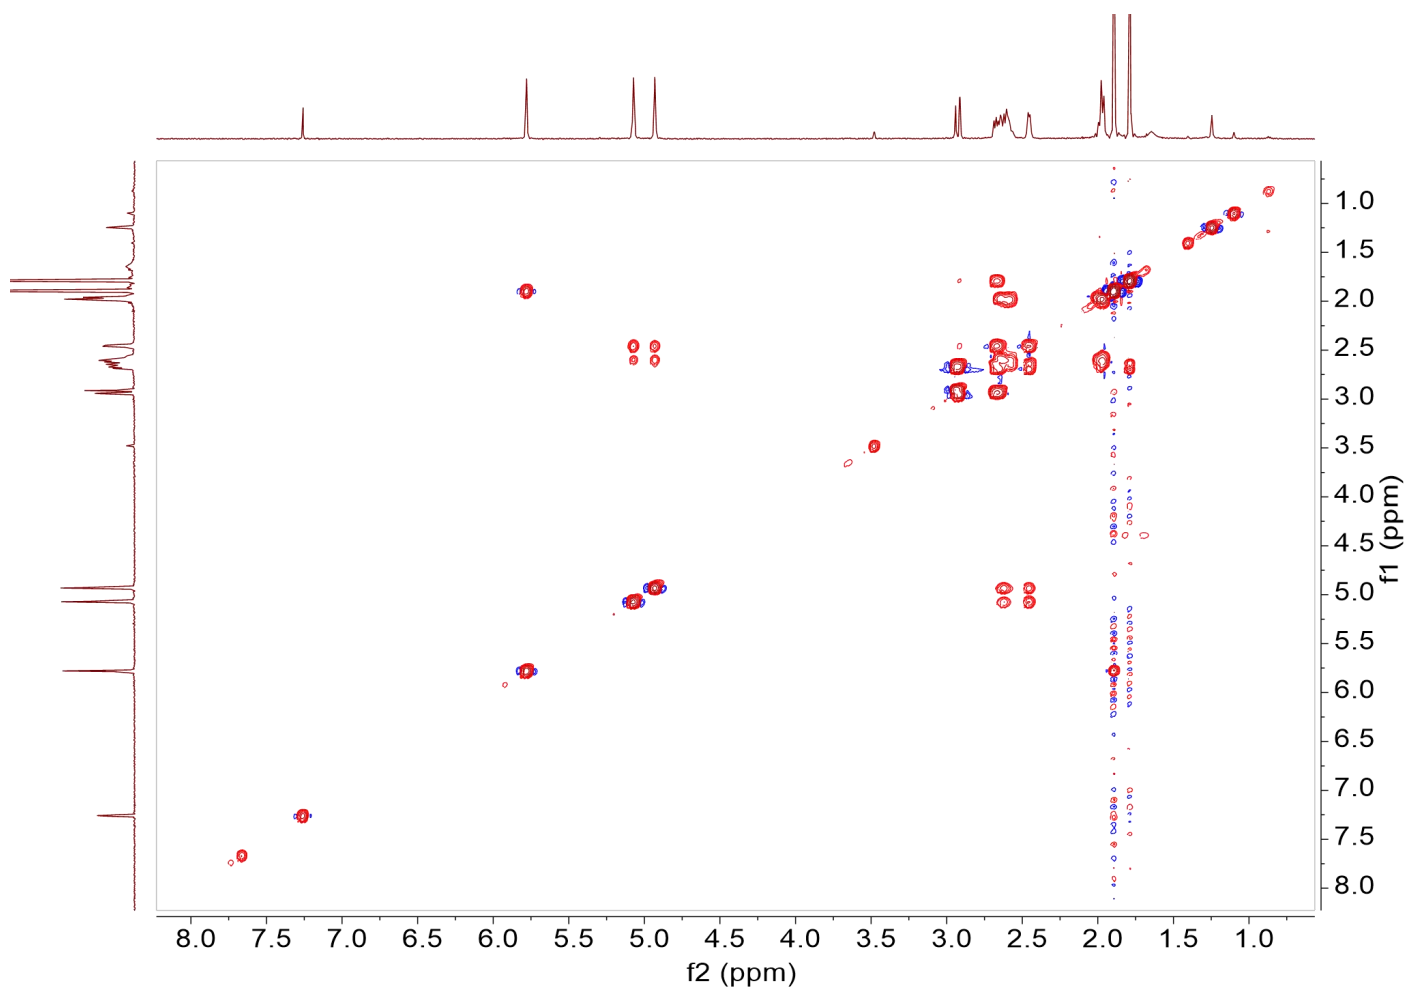

Fig. S22.  $^1\text{H}$ - $^1\text{H}$ -COSY spectrum of compound **2** in  $\text{CDCl}_3$ .

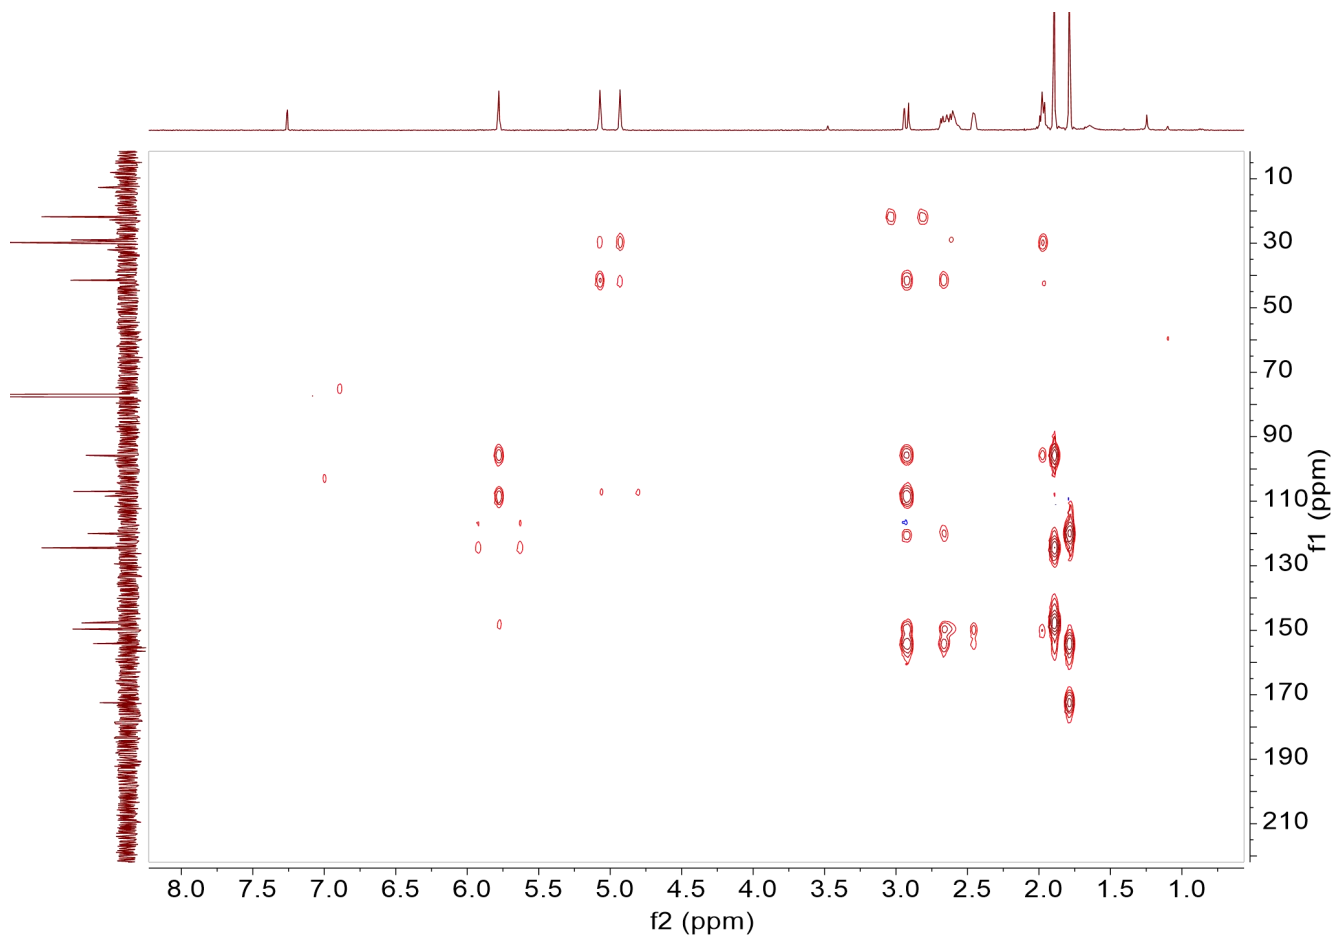

**Fig. S23.** NOESY spectrum of compound **2** in CDCl<sub>3</sub>.

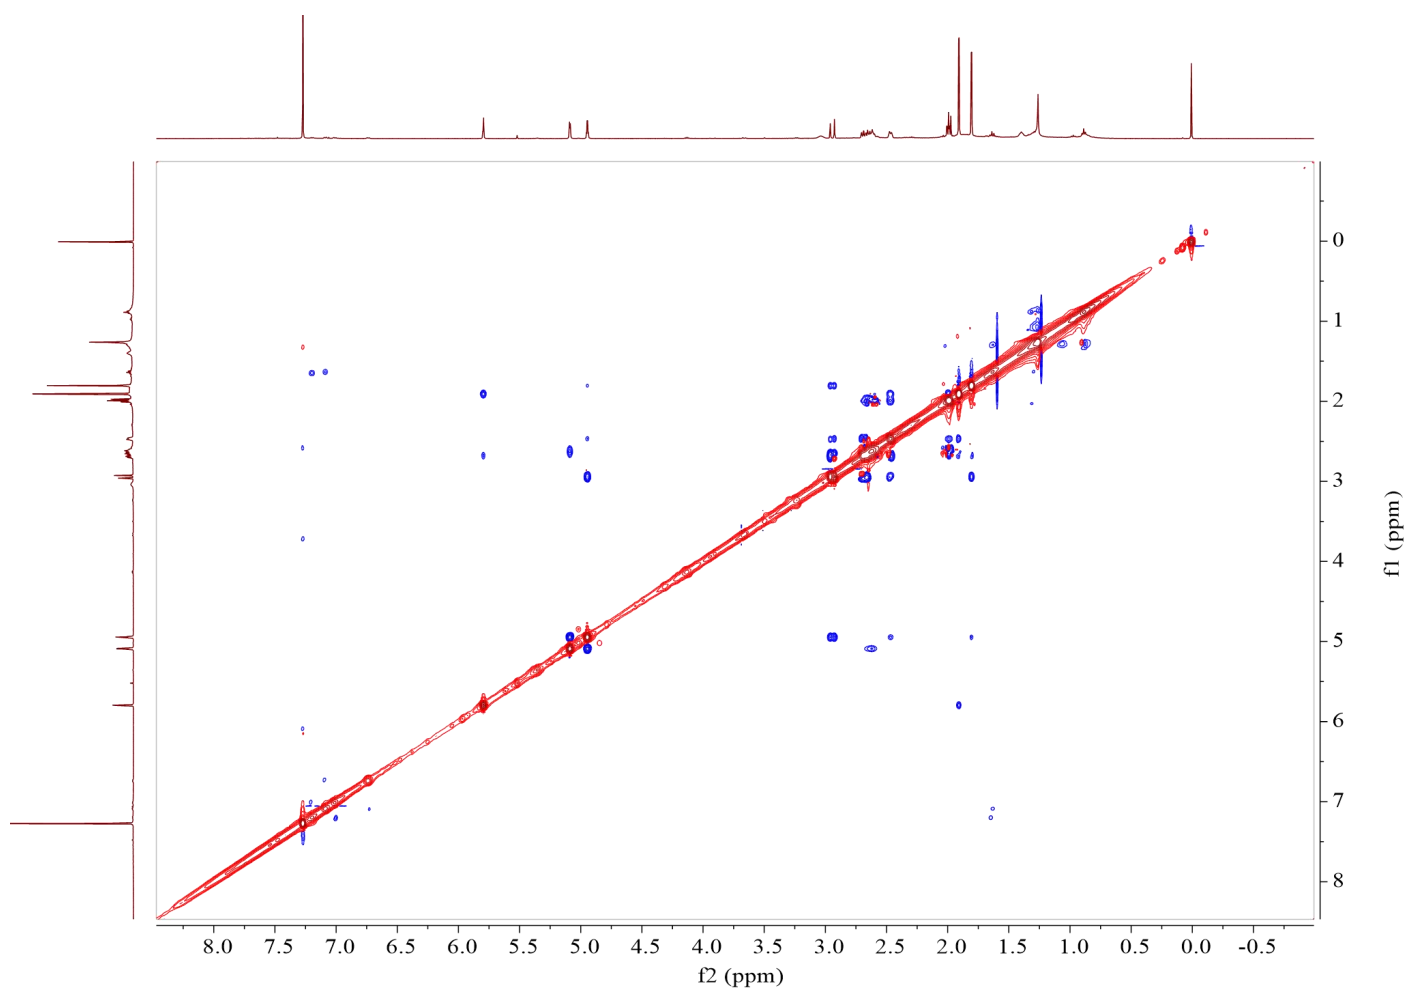

**Fig. S24.** HMBC spectrum of compound **2** in CDCl<sub>3</sub>.



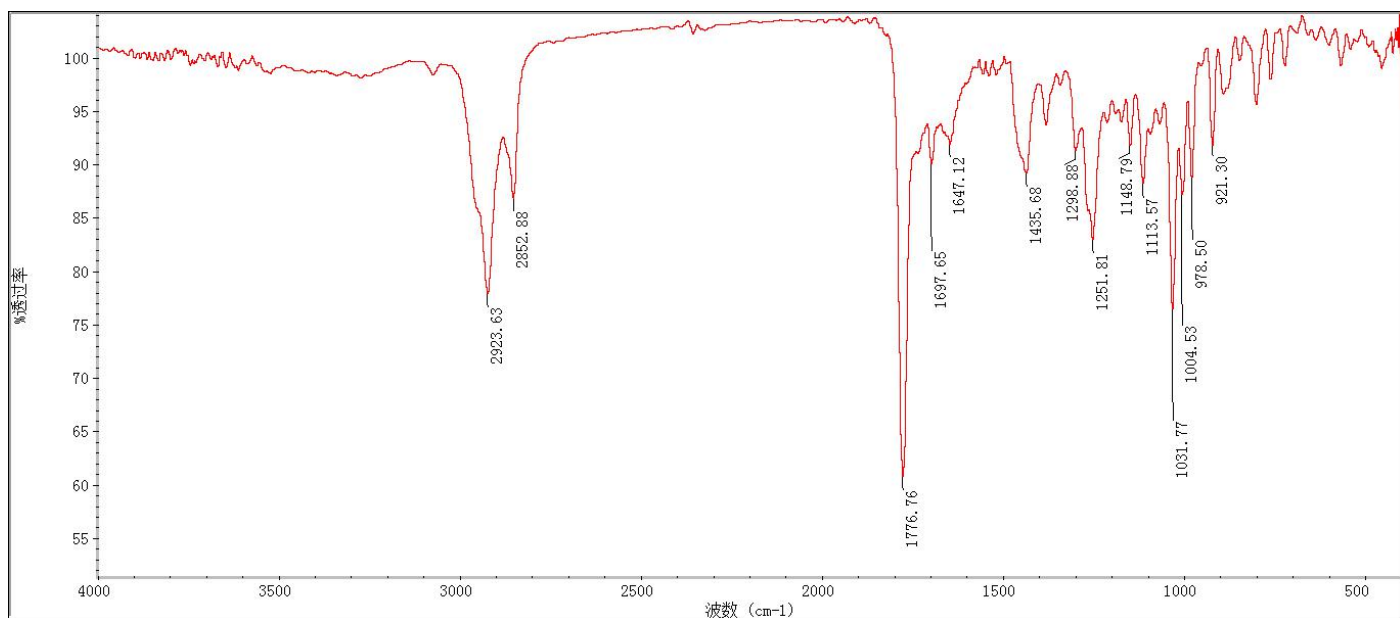

Fig. S25. IR spectrum of compound 2.

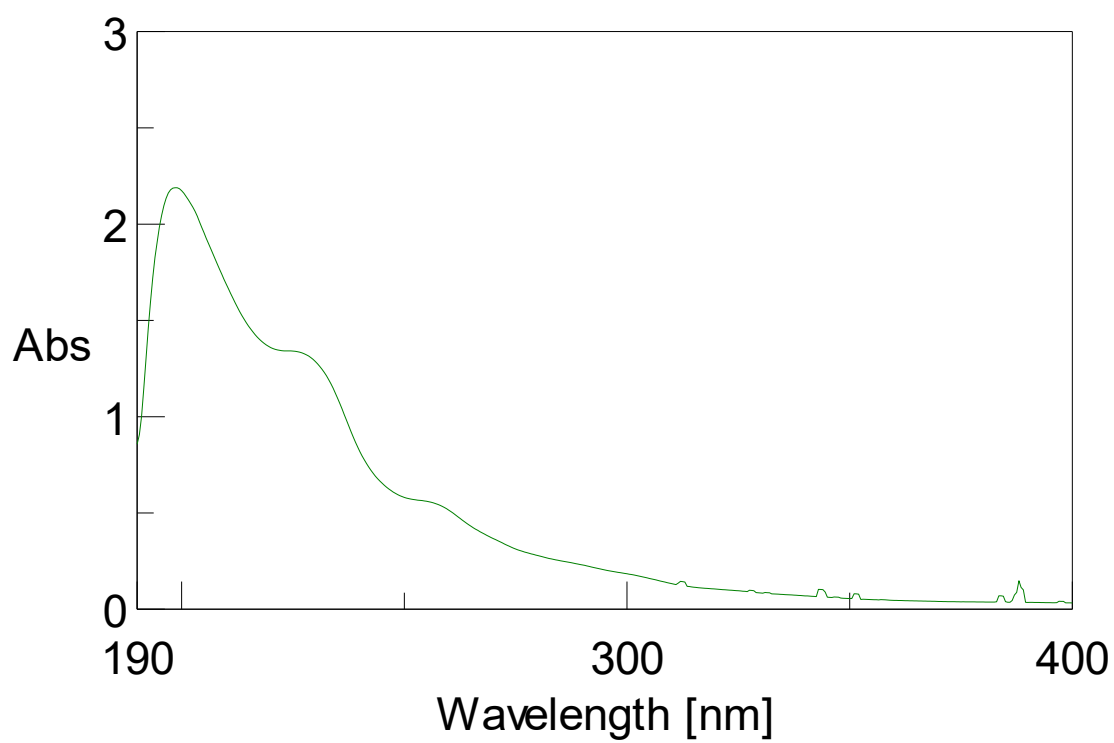

Fig. S26. UV spectrum of compound 2.

20121016-B5-1-3\_121016154026 #57-60 RT: 1.34-1.41 AV: 4 NL: 8.17E6  
T: FTMS + p ESI sid=40.00 Full ms [100.00-1000.00]

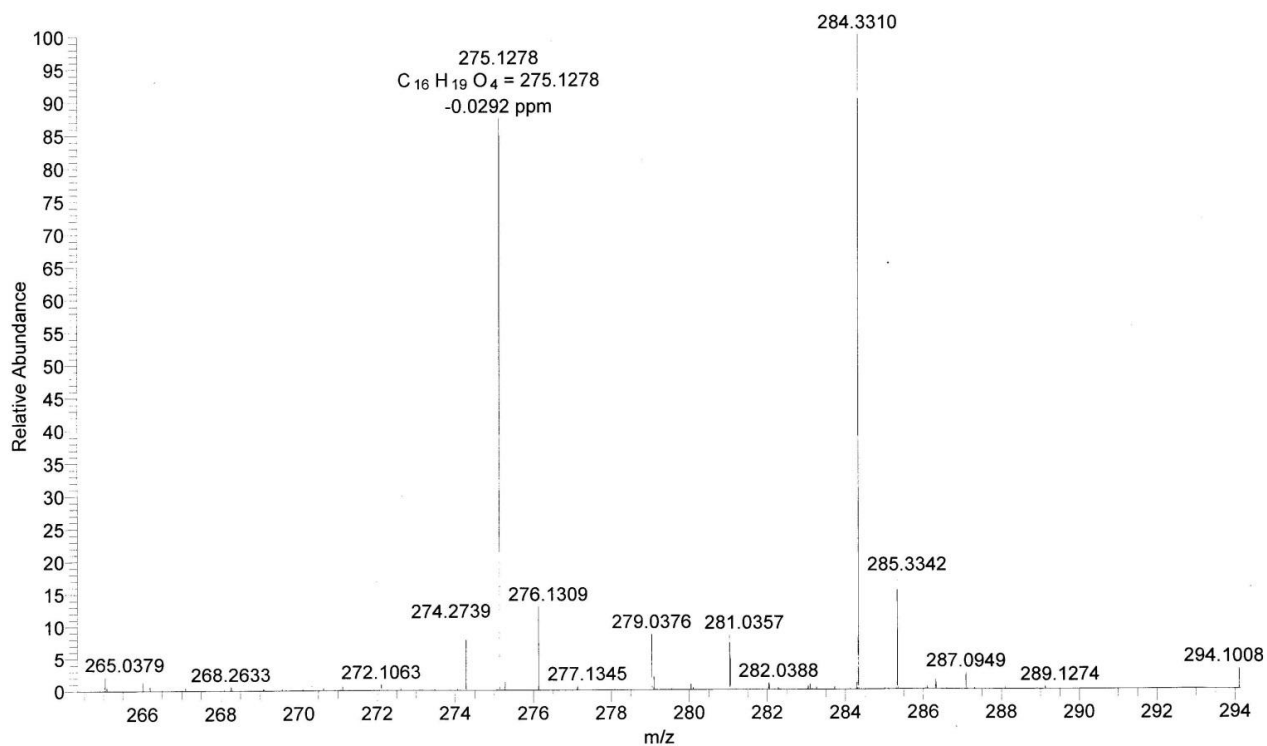

Fig. S27. HRESIMS spectrum of compound 3.

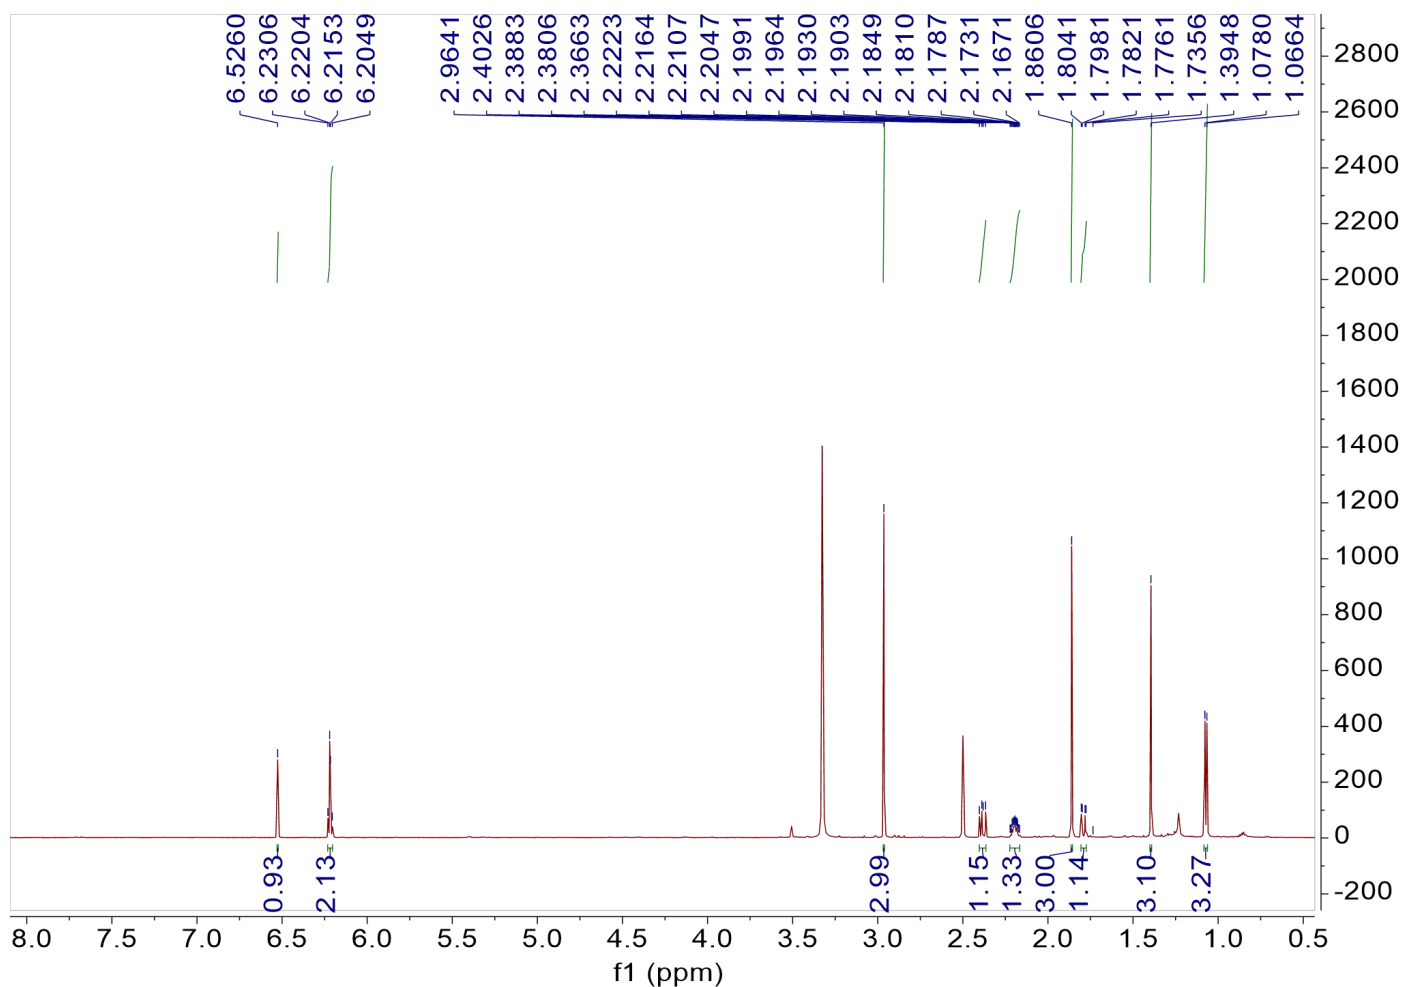

Fig. S28.  $^1\text{H}$  NMR spectrum of compound 3 in DMSO.

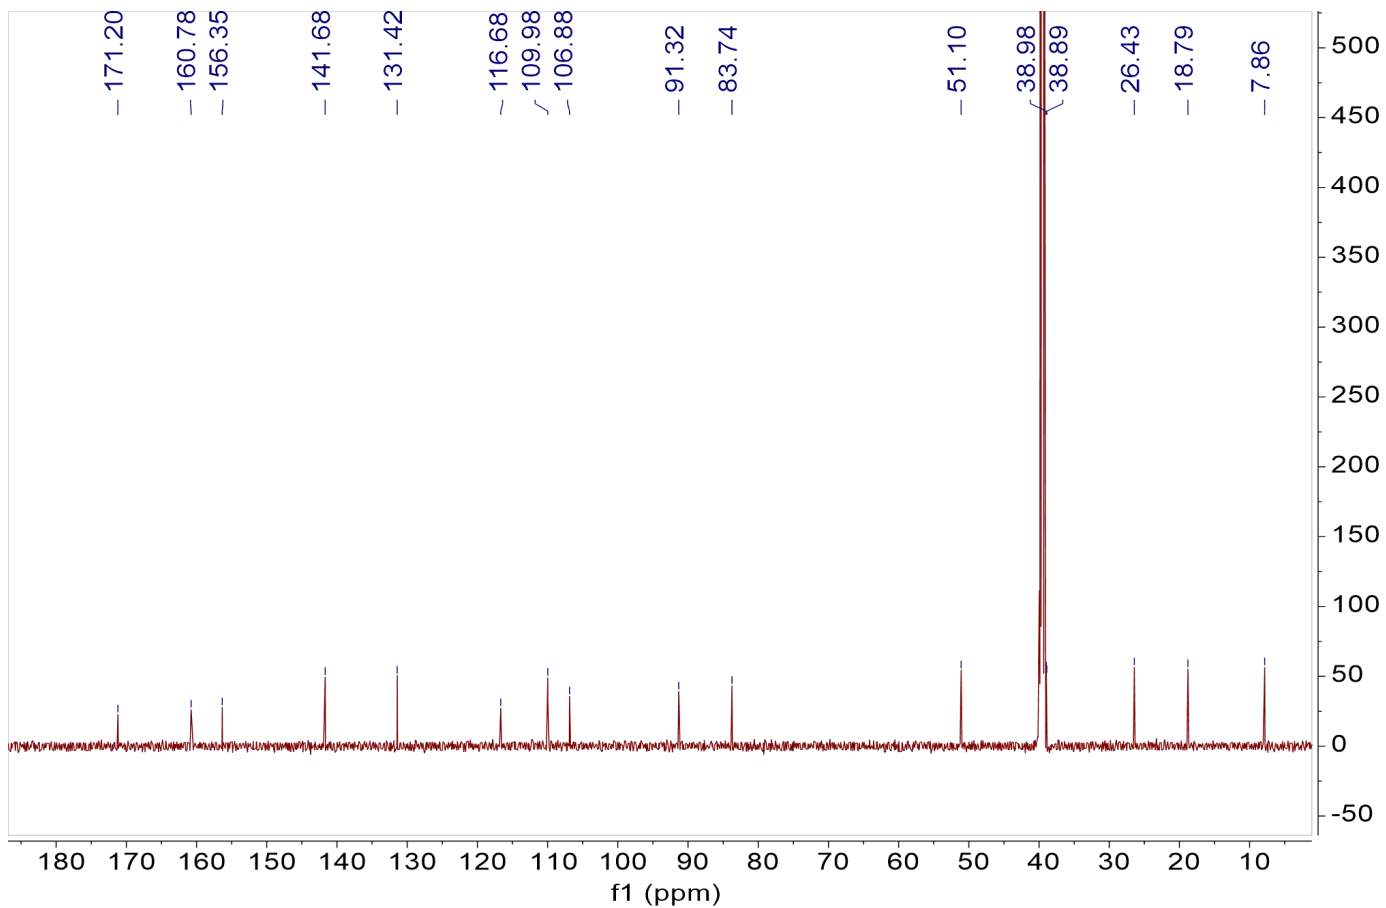

Fig. S29.  $^{13}\text{C}$  NMR spectrum of compound **3** in DMSO.

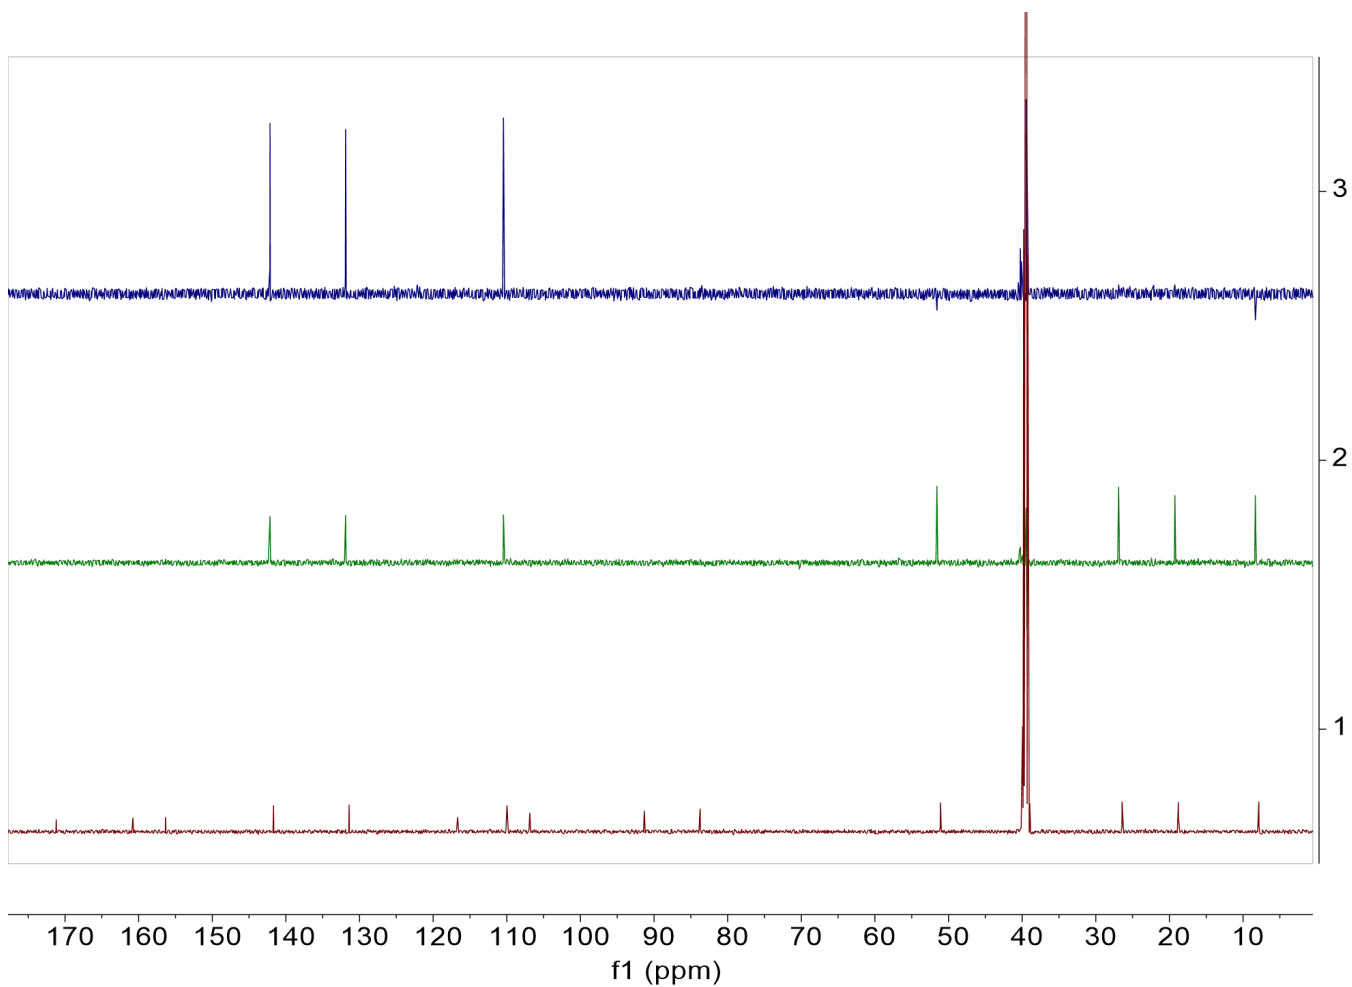

Fig. S30.  $^{13}\text{C}$  and DEPT spectrum of compound **3** in DMSO.

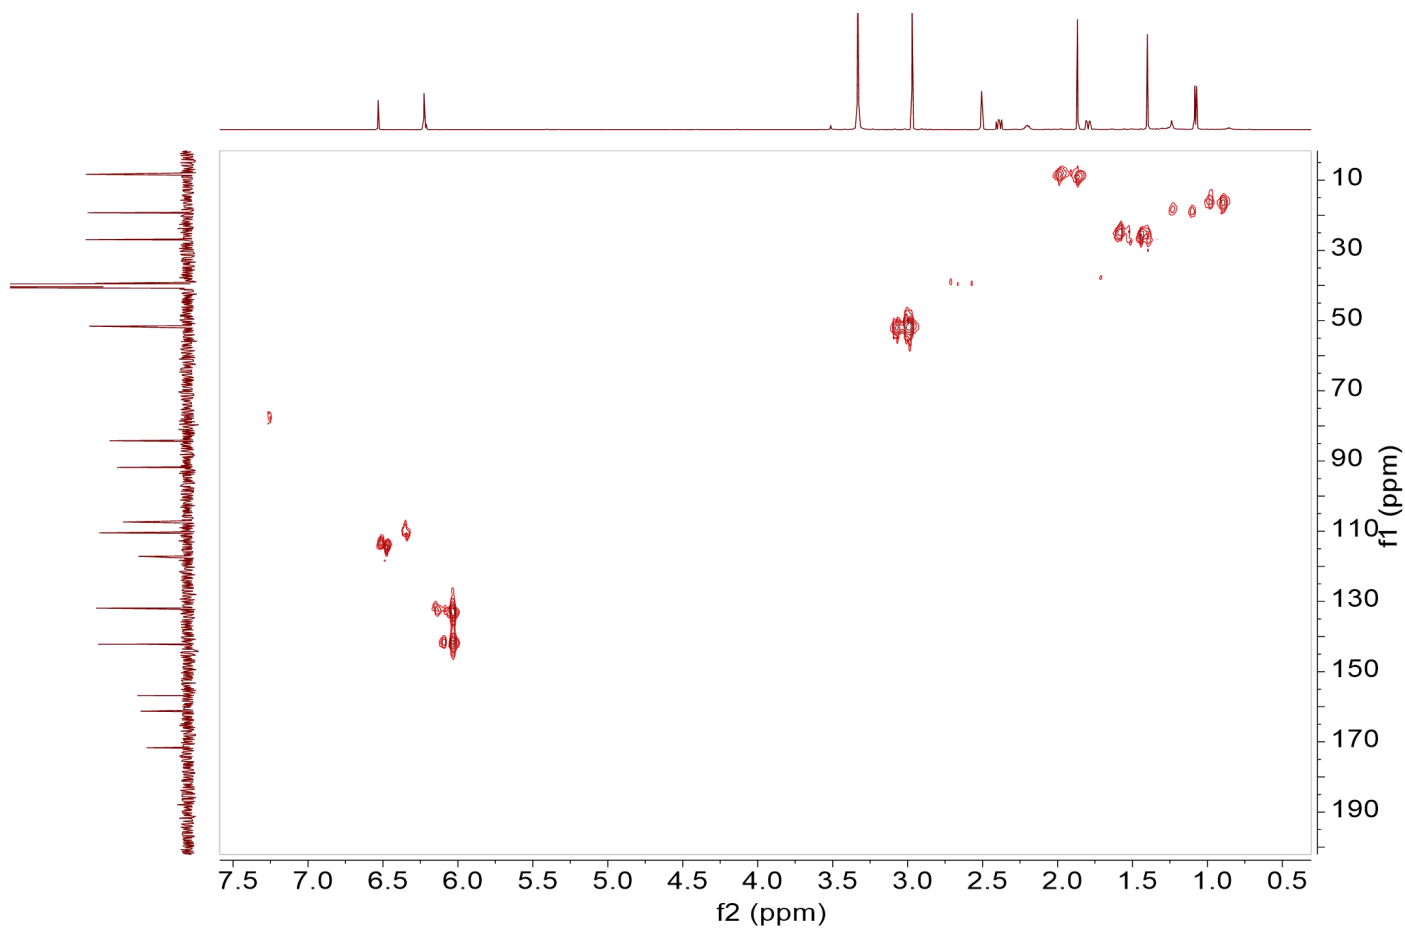

Fig. S31. HSQC spectrum of compound **3** in DMSO.

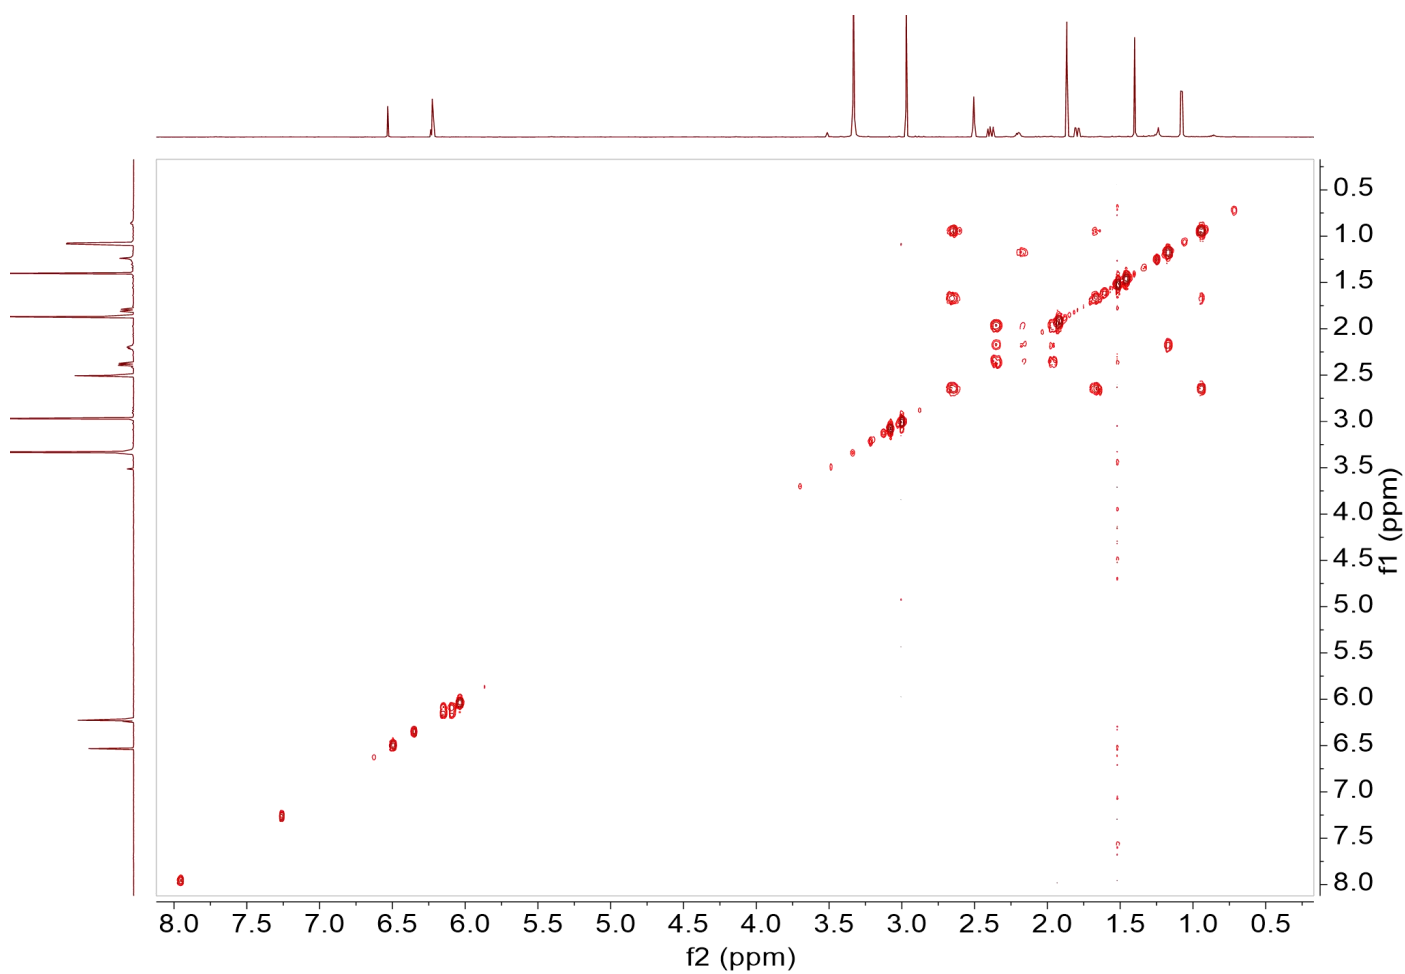

Fig. S32.  $^1\text{H}$ - $^1\text{H}$ -COSY spectrum of compound **3** in DMSO.

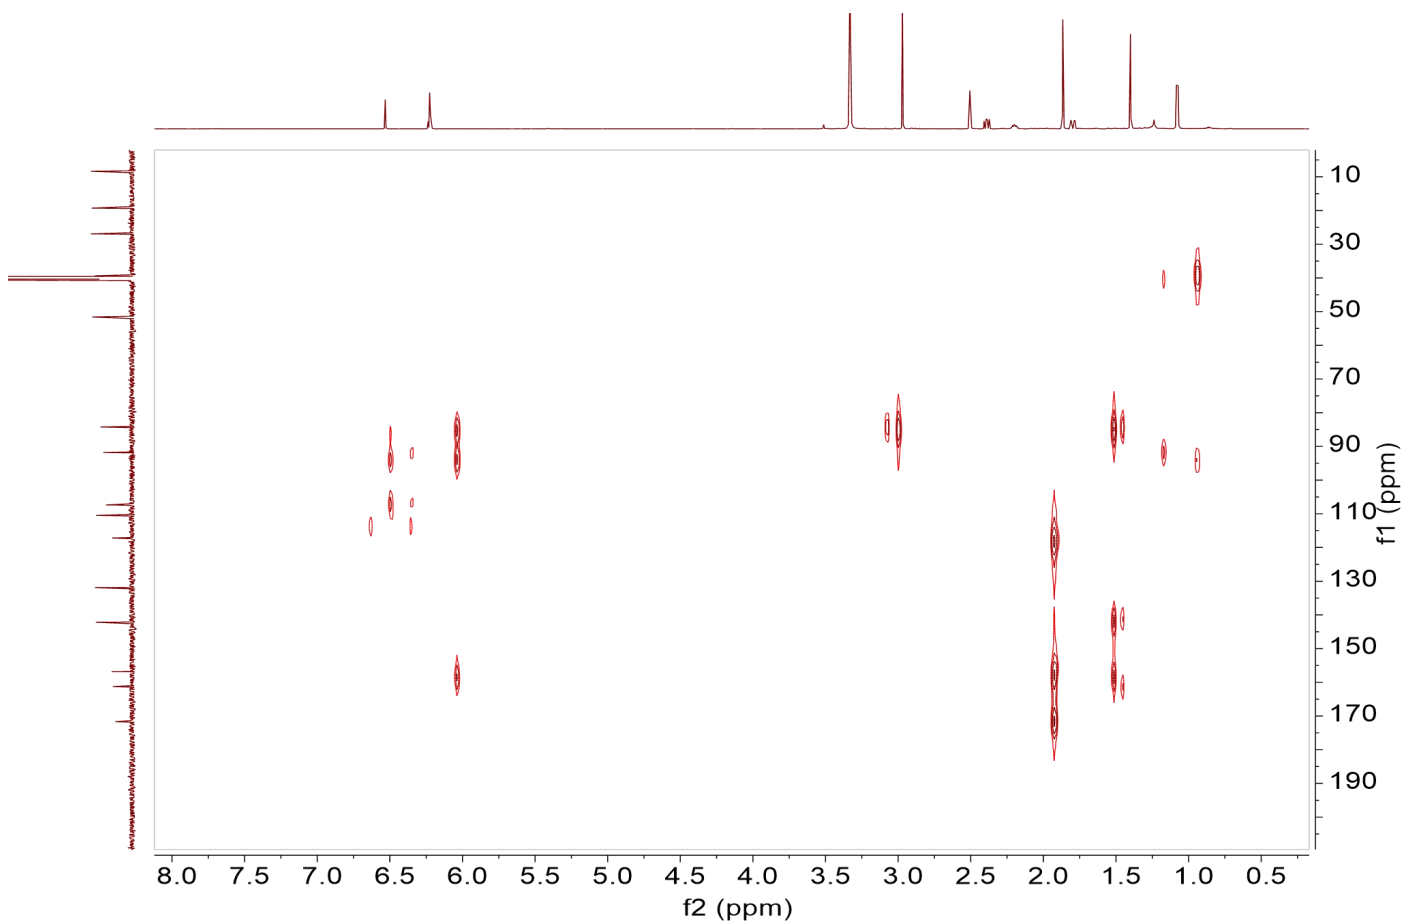

Fig. S33. HMBC spectrum of compound **3** in DMSO.

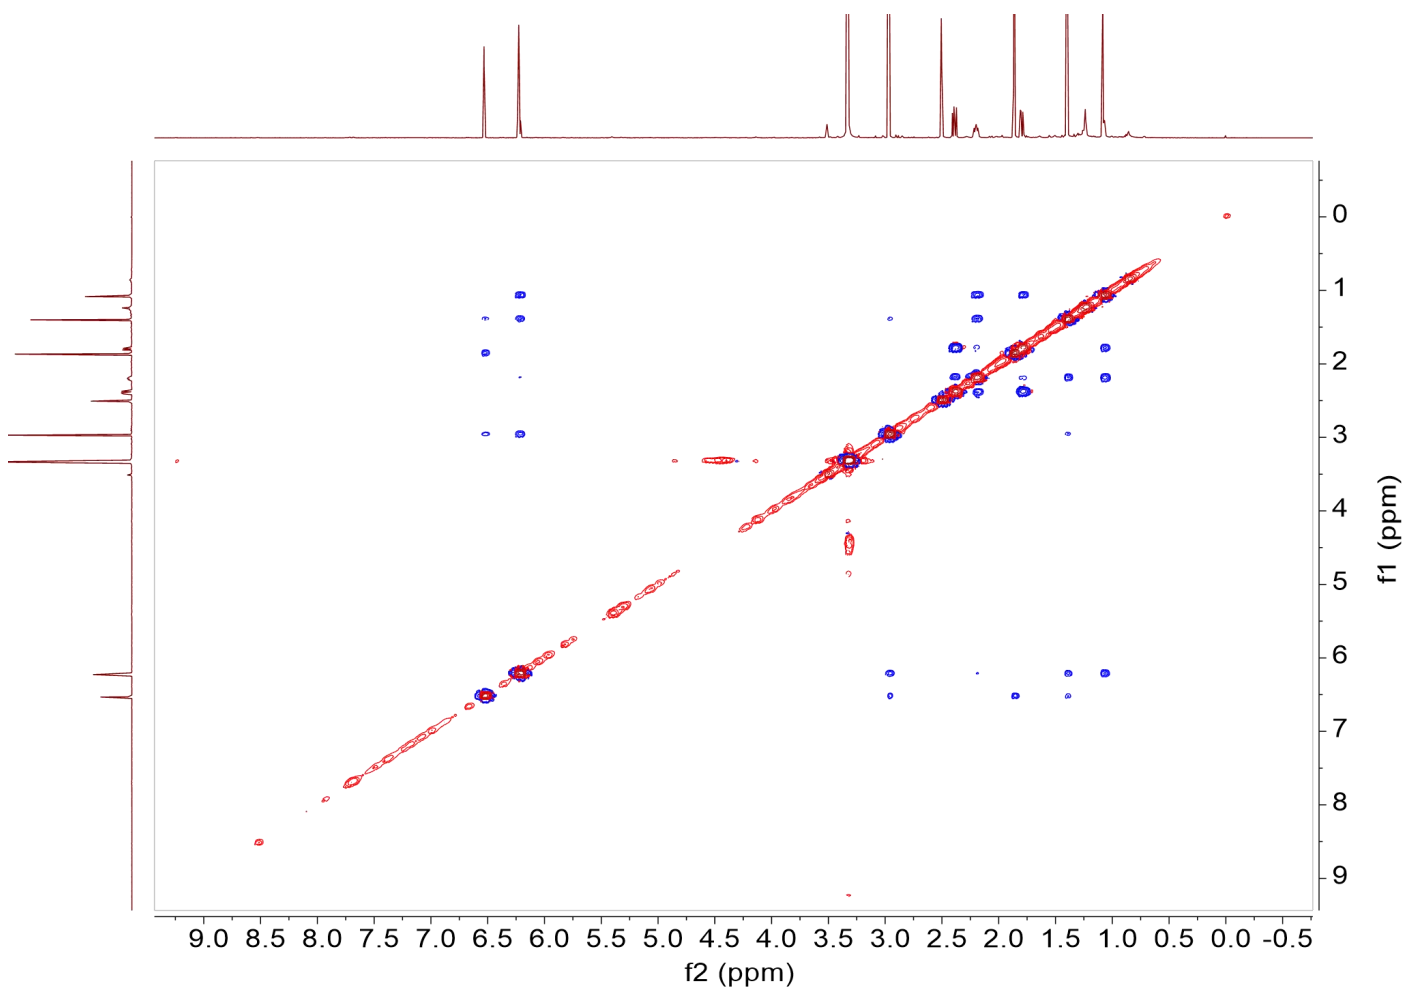

Fig. S34. NOESY spectrum of compound **3** in DMSO.

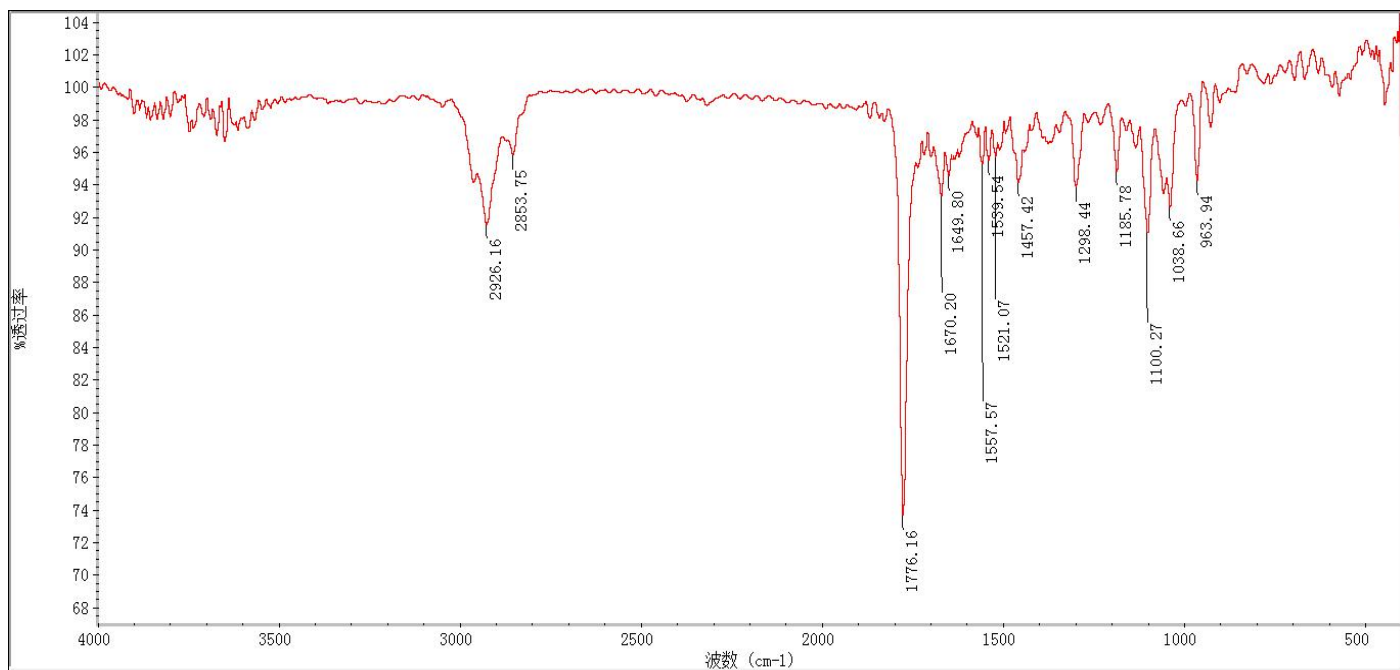

Fig. S35. IR spectrum of compound 3.

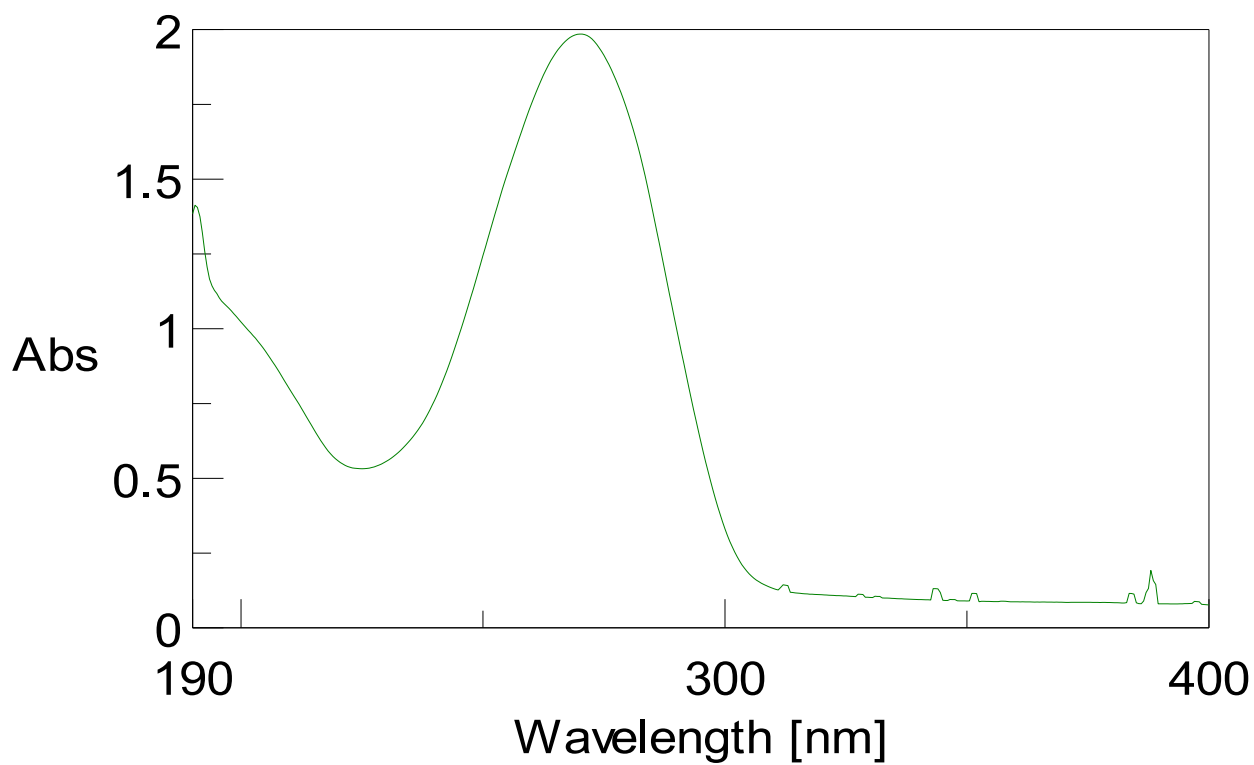

Fig. S36. UV spectrum of compound 3.

20121016-B5-1-3\_121016154026 #57-60 RT: 1.34-1.41 AV: 4 NL: 8.17E6  
T: FTMS + p ESI sid=40.00 Full ms [100.00-1000.00]

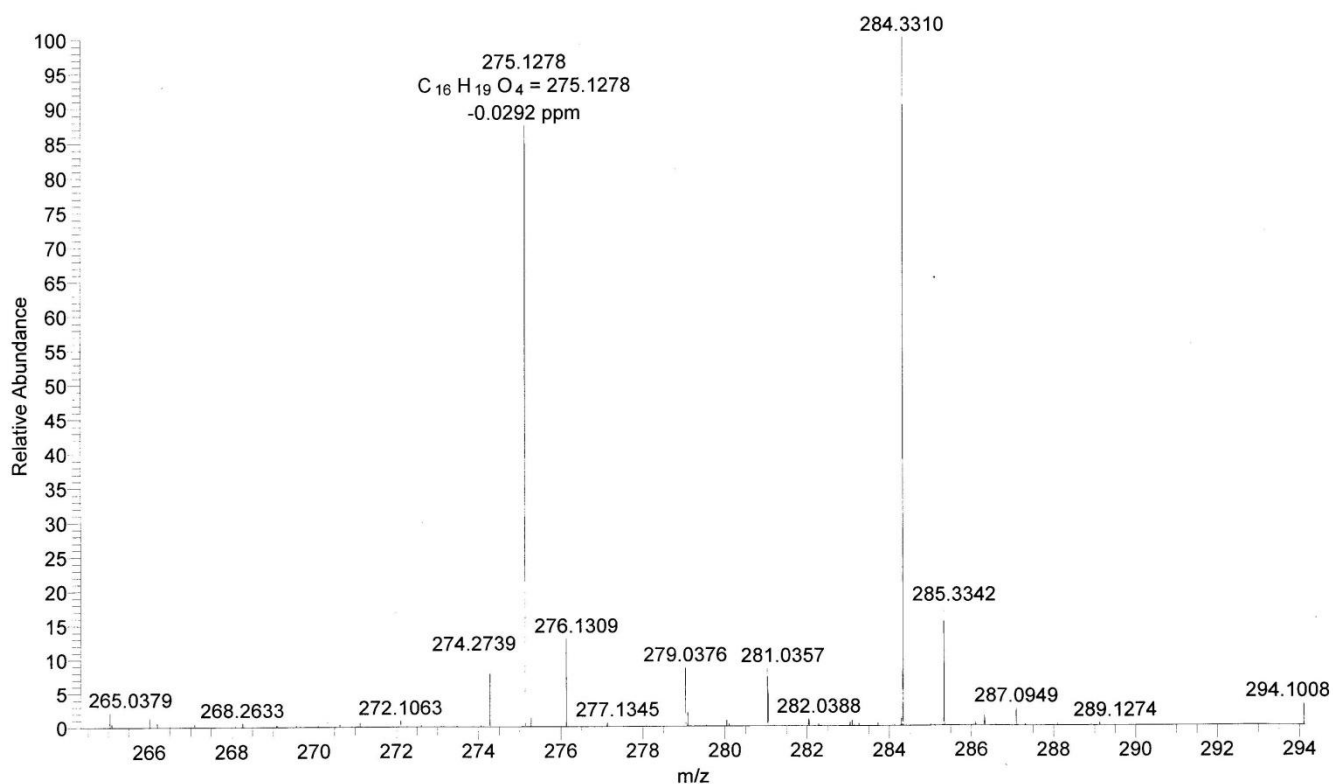

Fig. S37. HRESIMS spectrum of compound 4.

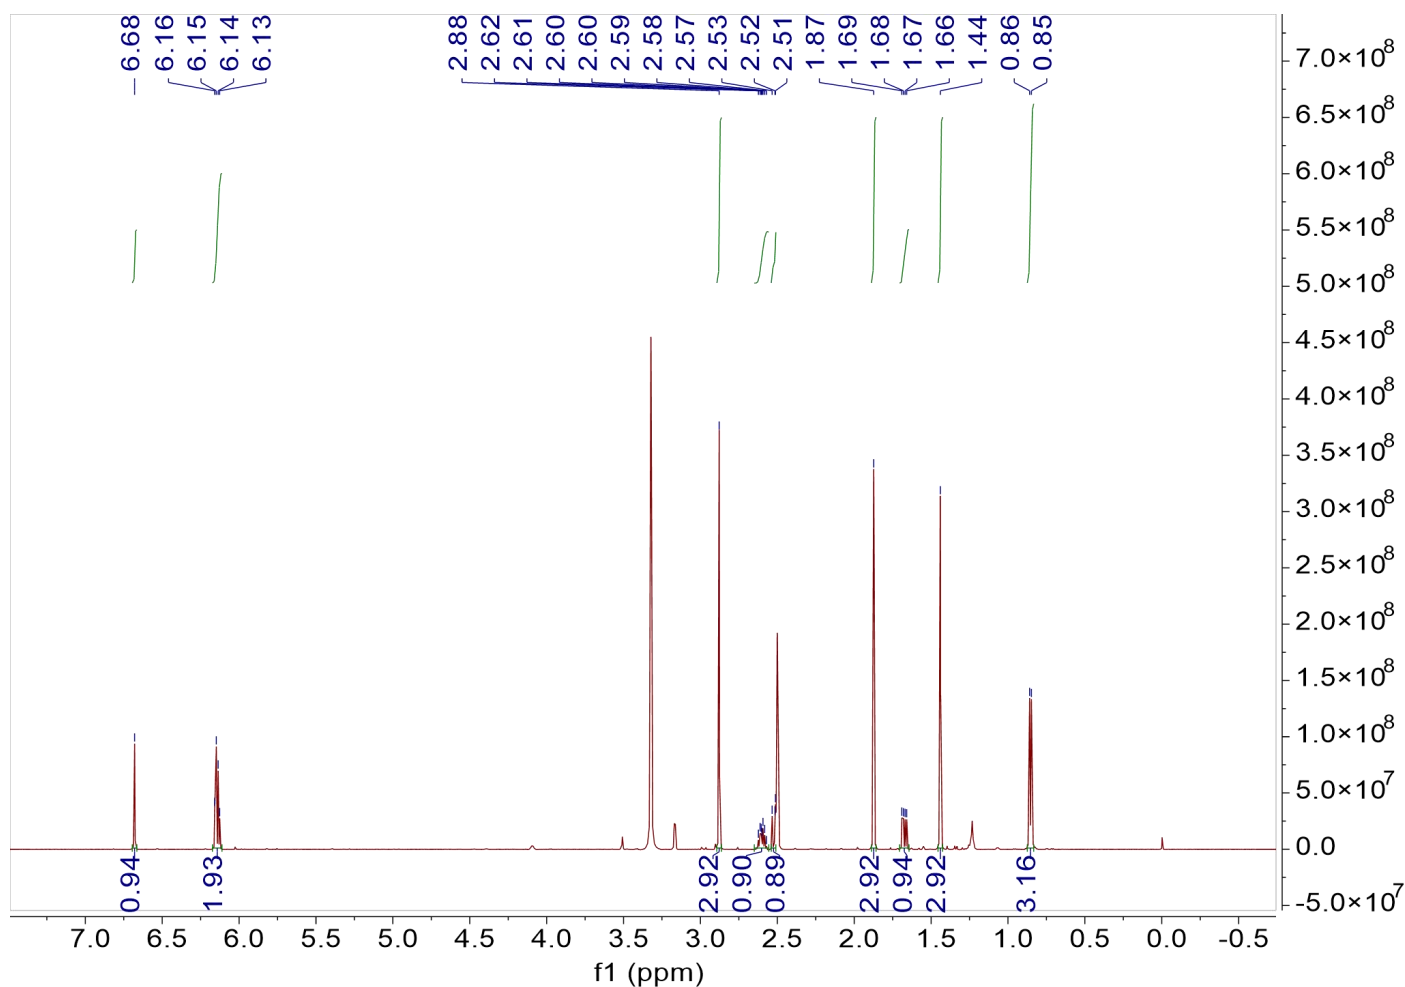

Fig. S38.  $^1H$  NMR spectrum of compound 4 in DMSO.

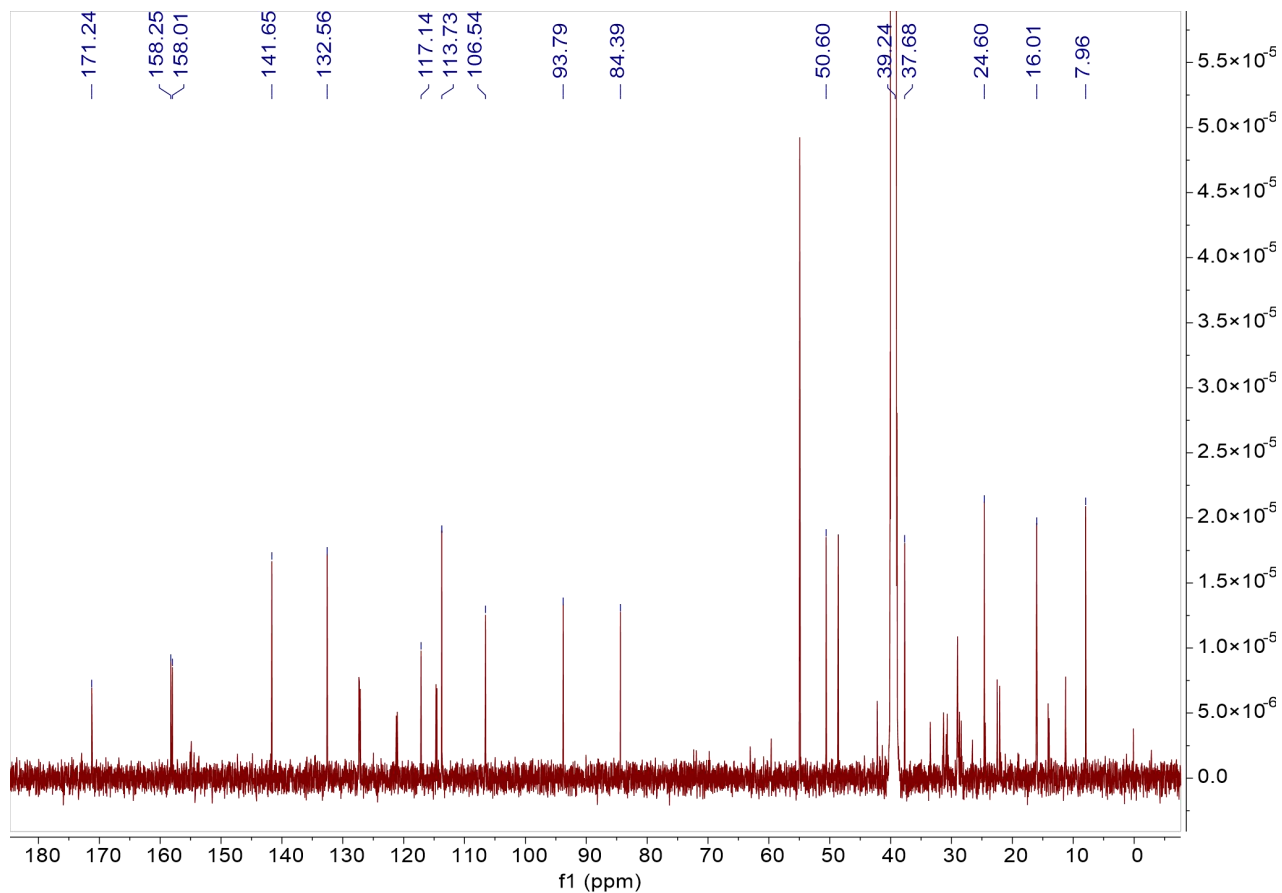

**Fig. S39.**  $^{13}\text{C}$  NMR spectrum of compound **4** in DMSO.

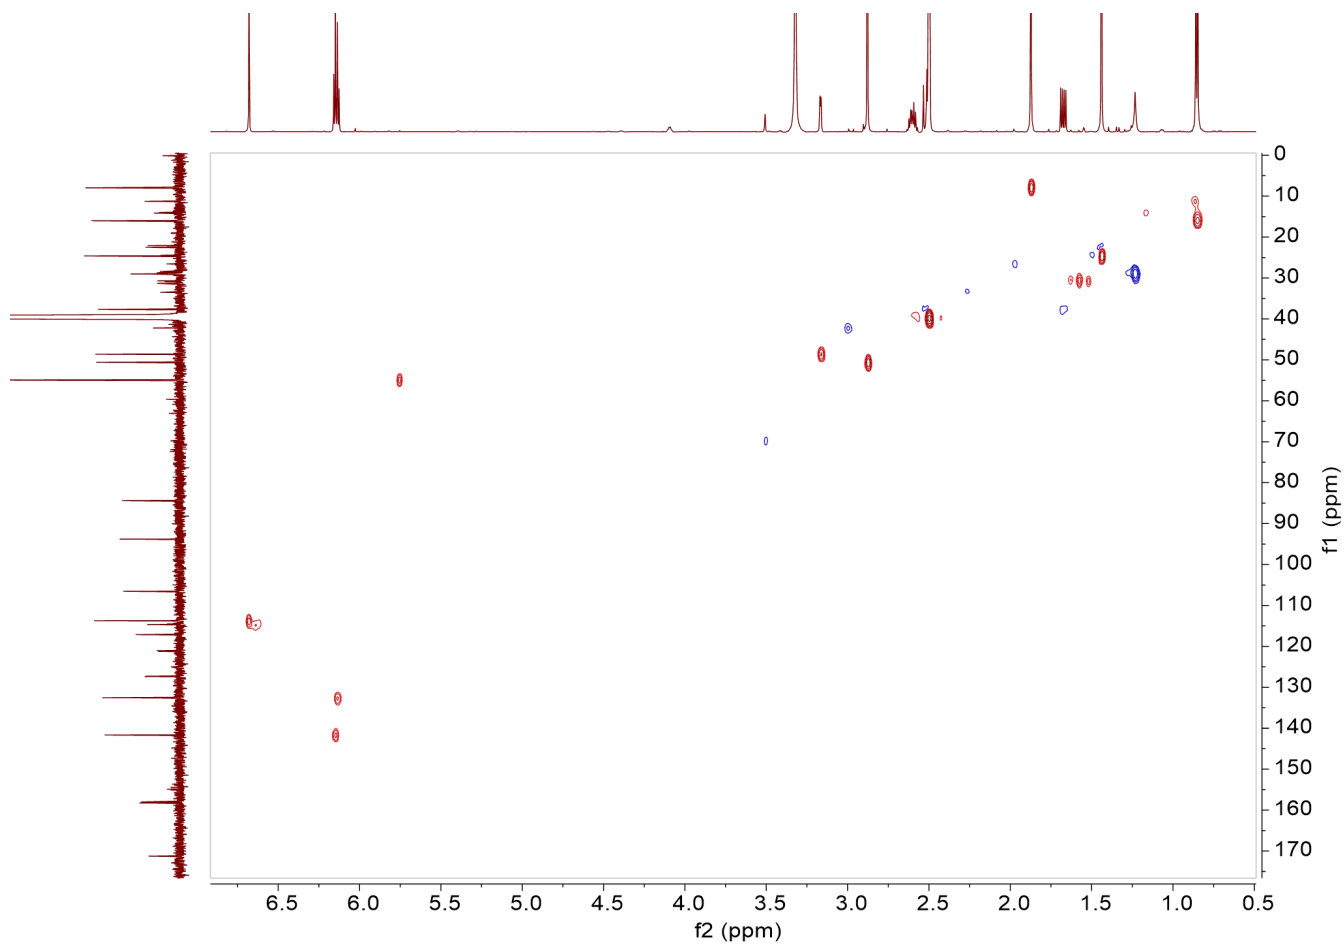

**Fig. S40.** HSQC spectrum of compound **4** in DMSO.



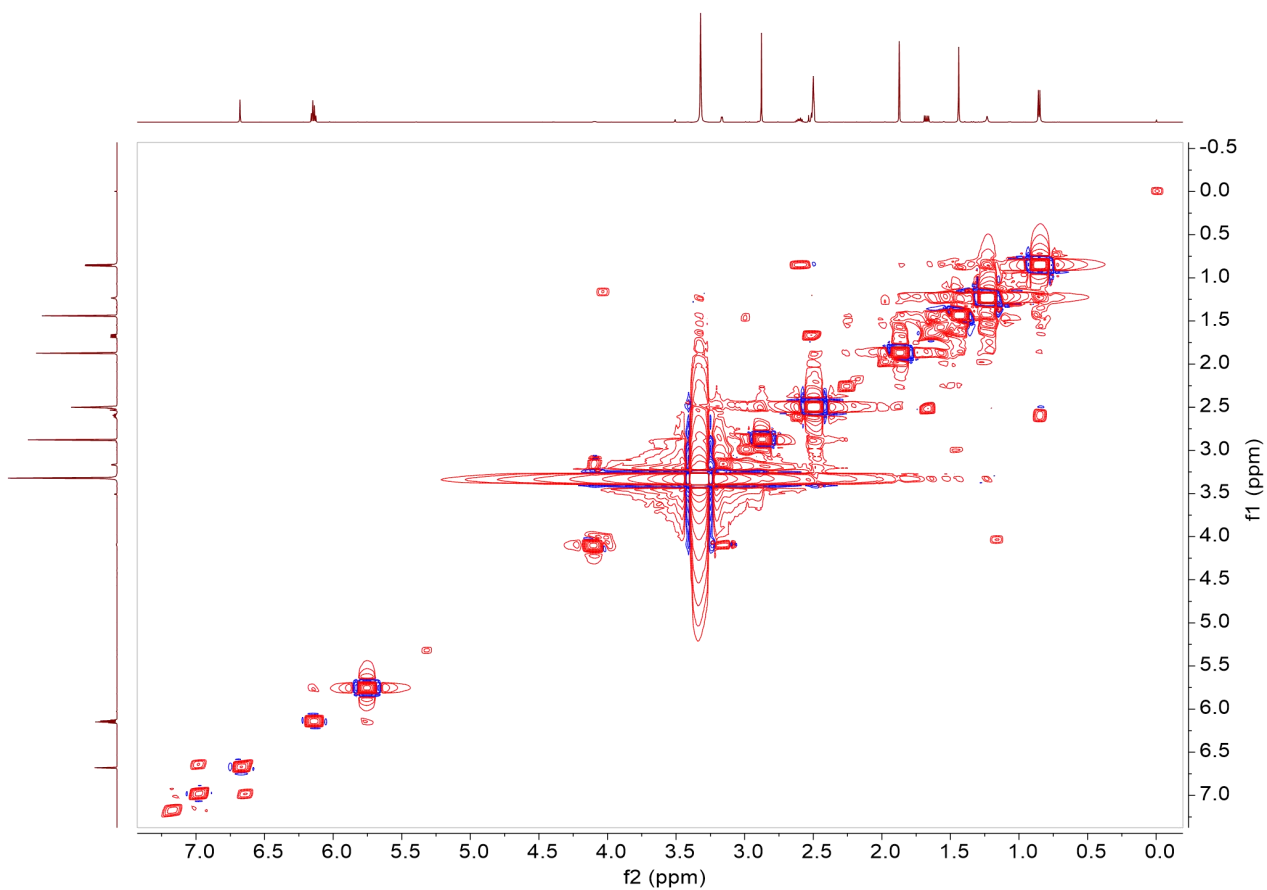

Fig. S41.  $^1\text{H}$ - $^1\text{H}$ -COSY NMR spectrum of compound 4 in DMSO.

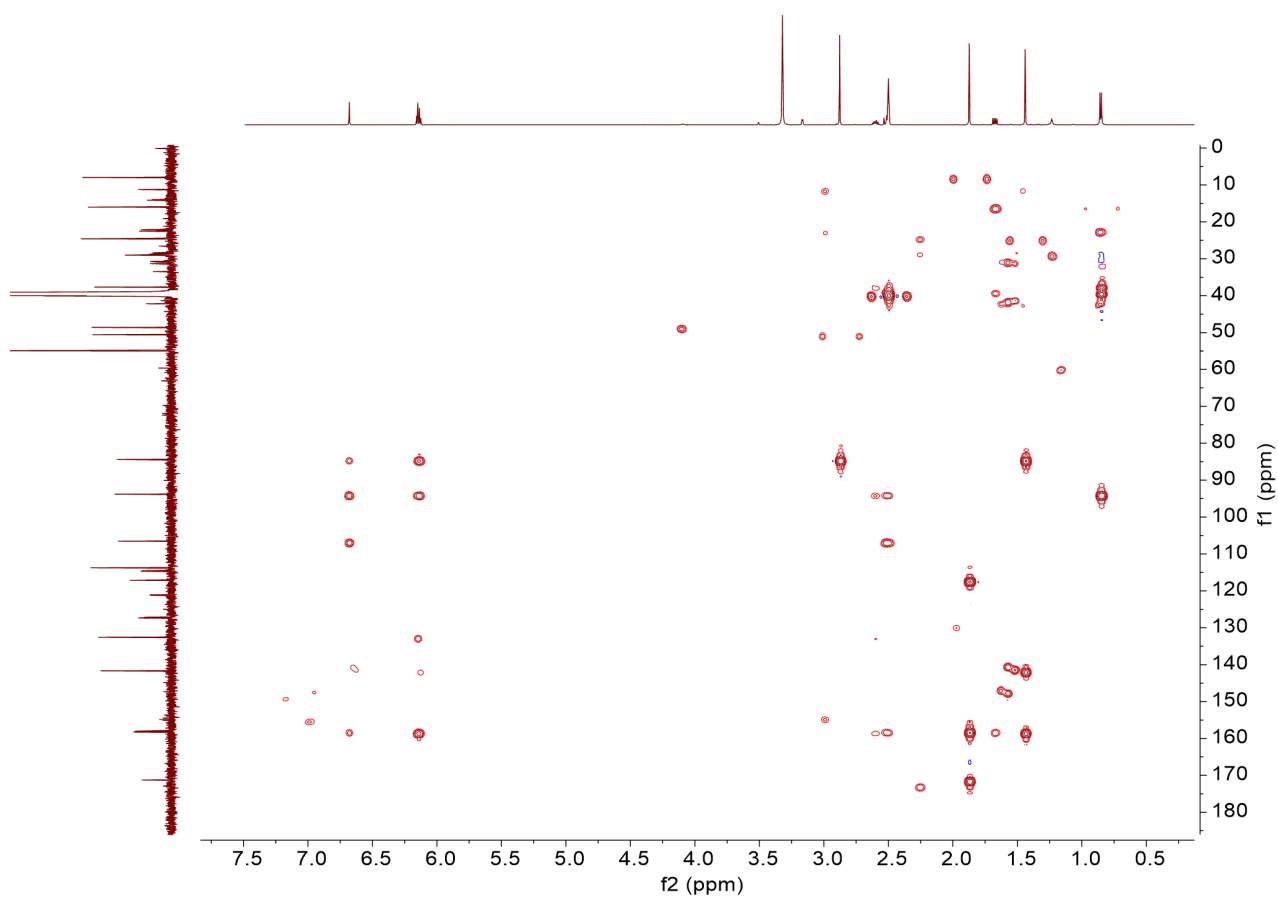

Fig. S42. HMBC NMR spectrum of compound 4 in DMSO.

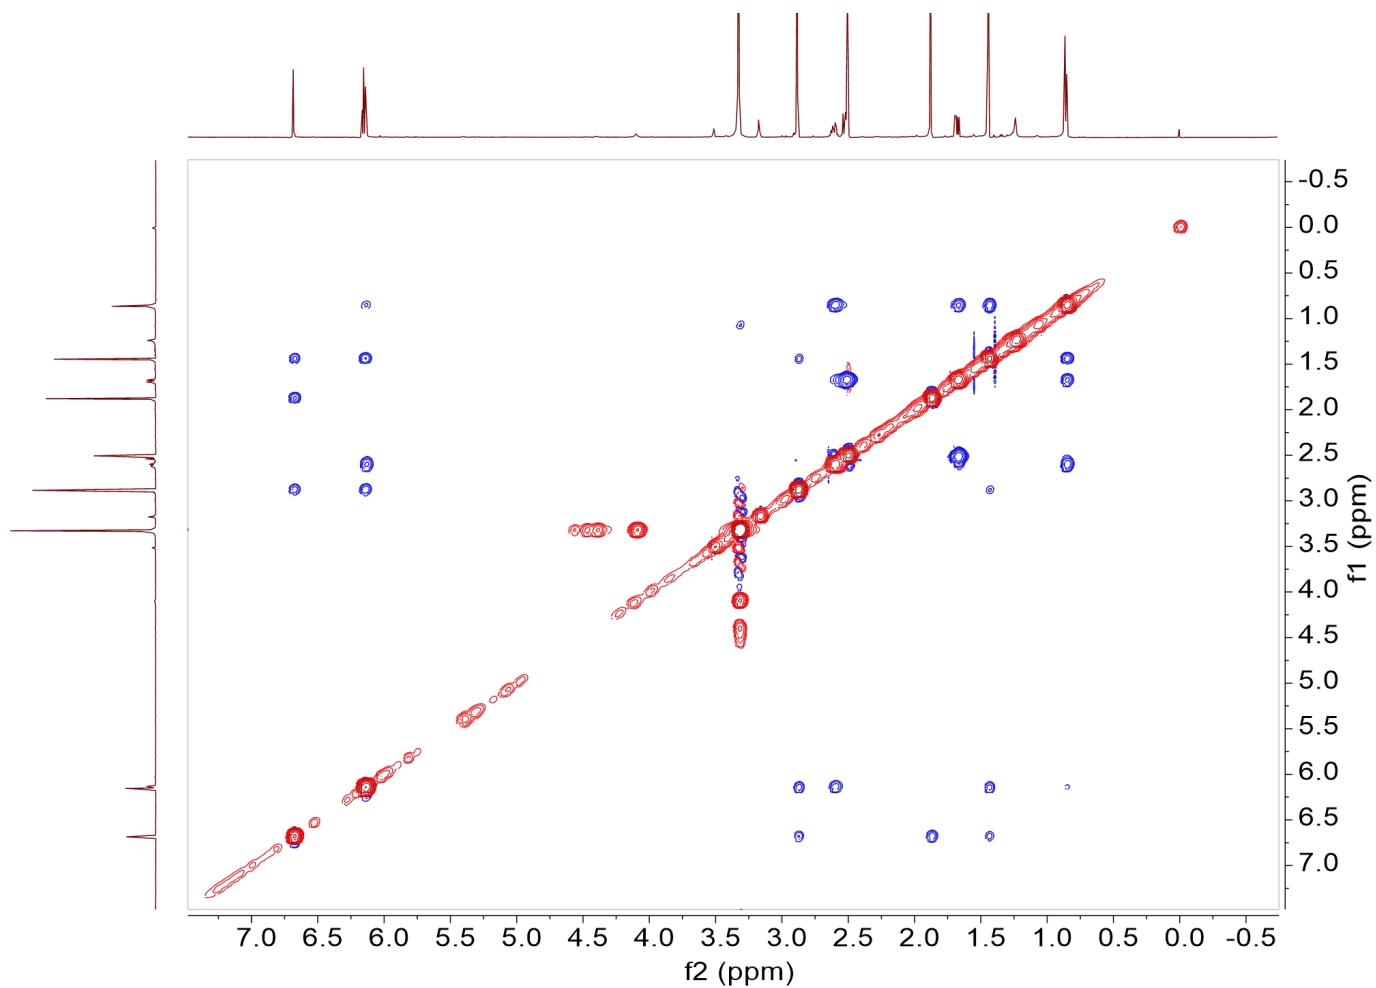

Fig. S43 NOESY spectrum of compound 4 in CDCl<sub>3</sub>.

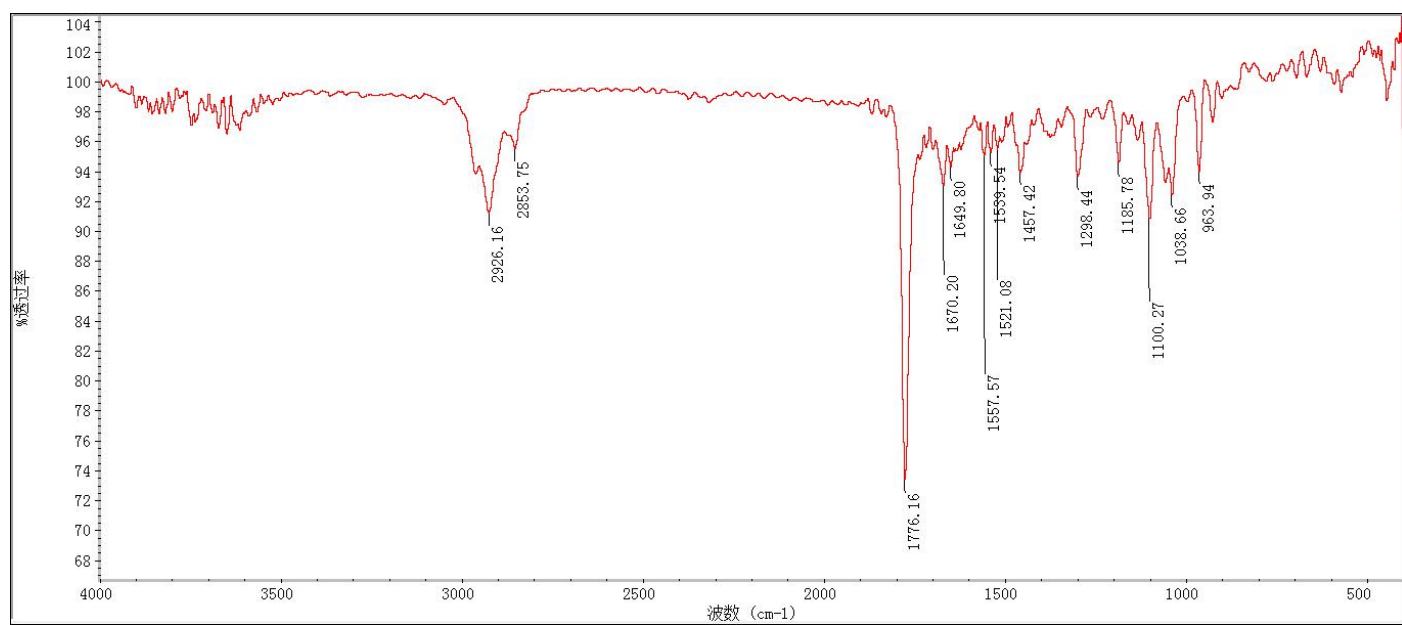

Fig. S44. IR spectrum of compound 4.

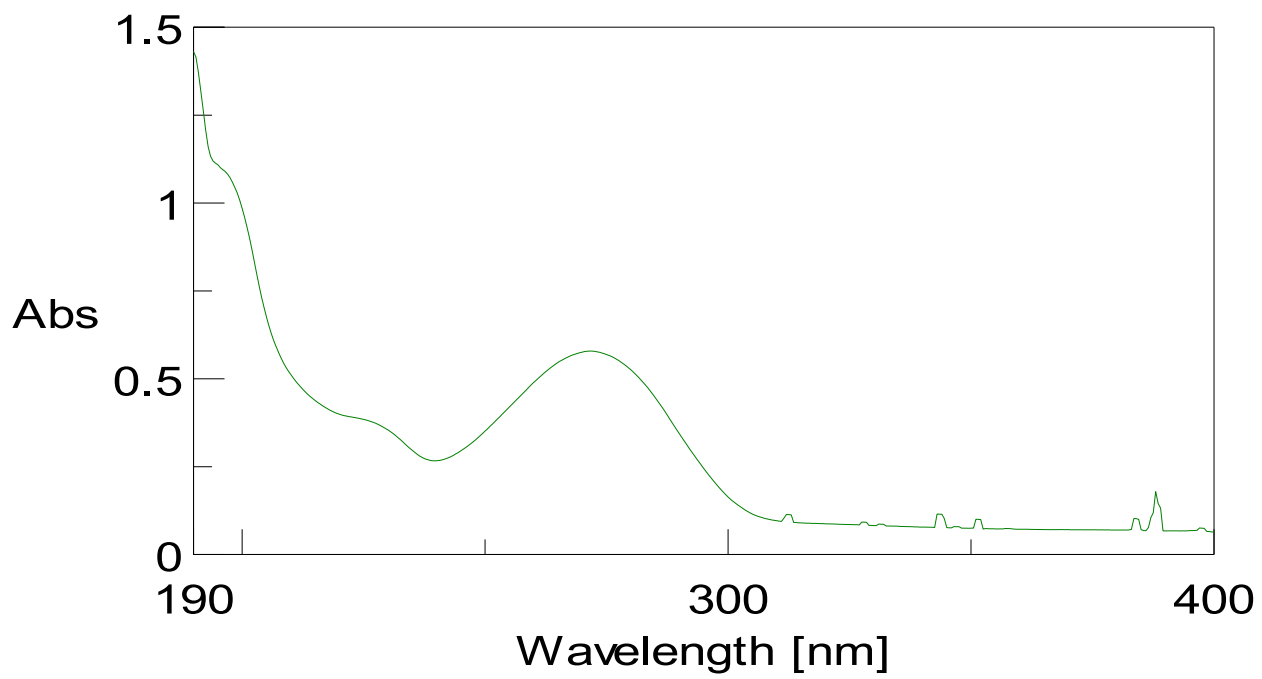

Fig. S45. UV spectrum of compound 4.
